# Supplementary material for: Reduction of CS2 to an ethanetetrathiolate by a hydride-bridged uranium–iridium heterobimetallic complex
Source: Royal Society of Chemistry journal article supplement (doi:10.1039/d4cc02482f), 2024-01-01
Supplement: d4cc02482f1.pdf [file d4cc02482f1.pdf]

## Reduction of CS<sub>2</sub> to an Ethanetetrathiolate by a Hydride-Bridged Uranium–Iridium Heterobimetallic Complex

Christopher Z. Ye,<sup>a,b</sup> Iker Del Rosal,<sup>c</sup> Erik T. Ouellette,<sup>a,b</sup> Stephan Hohloch,<sup>d</sup> Laurent Maron,<sup>c</sup> Clément Camp\*<sup>e</sup>, and John Arnold\*<sup>a,b</sup>

<sup>a</sup>Department of Chemistry, University of California, Berkeley, California 94720, USA.

<sup>b</sup>Chemical Sciences Division, Lawrence Berkeley National Laboratory, Berkeley, California 94720, USA

<sup>c</sup>Université de Toulouse, CNRS, INSA, UPS, UMR 5215, LPCNO, 135 Avenue de Rangueil, F-31077 Toulouse, France.

<sup>d</sup>University of Paderborn, Warburger Straße 100, 33098 Paderborn, Germany.

<sup>e</sup>Laboratory of Catalysis, Polymerization, Processes and Materials (CP2M UMR 5128) CNRS, Université Claude Bernard Lyon 1, CPE-Lyon, Institut de Chimie de Lyon, 43 Bvd du 11 Novembre 1918, 69616 Villeurbanne, France.

## **Supporting Information**

|                         |         |
|-------------------------|---------|
| Experimental Procedures | S3-S4   |
| UV/Vis/NIR Spectroscopy | S5      |
| IR Spectroscopy         | S6      |
| NMR Spectroscopy        | S7-S10  |
| X-ray Crystallography   | S11-S12 |
| Computational Section   | S13-S96 |
| References              | S97     |

## Experimental Procedures

*General considerations:* Unless otherwise noted, all reactions were performed using standard Schlenk line techniques under an atmosphere of nitrogen, or in an MBraun inert atmosphere glove box under an atmosphere of nitrogen. Glassware and Celite® were stored in an oven at ca. 150 °C for at least 3 h prior to use. Molecular sieves (4 Å) were activated by heating to 200 °C overnight under vacuum prior to storage in a glovebox. NMR spectra were recorded on Bruker AV-600 and AVB-400 spectrometers. <sup>1</sup>H and <sup>13</sup>C chemical shifts are given relative to residual solvent peaks and are recorded in units of parts per million (ppm). FT-IR samples were prepared as Nujol mulls pressed between KBr plates, with data collected with a Nicolet iS10 FT-IR spectrometer. Melting points were determined using sealed capillaries prepared under nitrogen on an OptiMelt automated melting point system. Elemental analyses were determined at the Microanalytical Facility at the College of Chemistry, University of California, Berkeley.

*Materials:* Tetrahydrofuran (THF) and *n*-hexane were purified by passage through columns of activated alumina and degassed by sparging with nitrogen. Deuterated solvents were degassed with three freeze-pump-thaw cycles and stored over molecular sieves. Hexamethyldisiloxane (HMDSO) was stirred over CaH<sub>2</sub>, distilled, and sparged with nitrogen. Benzylpotassium,<sup>1</sup> Cp\*IrH<sub>4</sub>,<sup>2</sup> and (Cp<sup>iPr4</sup>)<sub>2</sub>UI<sup>3</sup> were synthesized according to literature procedures. CO<sub>2</sub> was sourced from Linde, research grade (4.8 RS, 99.998% purity). All other chemicals were purchased from commercial sources and used as received.

### Synthesis of (Cp<sup>iPr4</sup>)<sub>2</sub>U(μ-H)<sub>3</sub>IrCp\* (1):

Cp\*IrH<sub>4</sub> (67.8 mg, 0.205 mmol, 1.05 equiv.) and benzyl potassium (27.1 mg, 0.208 mmol, 1.07 equiv.) were added to a 20 mL scintillation vial with THF (4 mL) to generate a solution of K[Cp\*IrH<sub>3</sub>]. (Cp<sup>iPr4</sup>)<sub>2</sub>UI (162.4 mg, 0.195 mmol, 1.00 equiv) was dissolved in THF (4 mL) and added to the K[Cp\*IrH<sub>3</sub>] solution, forming a dark green slurry as KI salt crashed out of solution. After stirring at room temperature for 2 h, the solvent was removed *in vacuo*. The crude solid was then triturated with *n*-hexane (1 mL) and the product was extracted with HMDSO, filtered through Celite, and concentrated (1 mL). This solution was cooled to -40 °C, affording dark green crystals (110.9 mg, 51% yield). Mp ca. 197 °C; <sup>1</sup>H NMR (600 MHz, C<sub>6</sub>D<sub>6</sub>): δ 6.32 (s, 12H, broad), 4.41 (s, 15H, Cp\*), 0.12 (s, 9 H, co-crystallized HMDSO), -6.55 (s, 12 H, broad), -31.04 (s, 1 H, broad); <sup>13</sup>C NMR (600 MHz, C<sub>6</sub>D<sub>6</sub>): δ 112.3, 39.1, 5.21, 1.69; IR (Nujol mull on KBr): 2033 (m), 1959 (s), 1253 (s), 1180 (m), 1146 (w), 1102 (w), 1058 (m), 1033 (w), 982 (w), 845 (s), 770 (m), 760 (m), 667 (w); Anal. Calcd (%) for UIrC<sub>44</sub>H<sub>76</sub>•0.5C<sub>6</sub>H<sub>18</sub>OSi<sub>2</sub>: C, 50.56; H, 7.67. Found: C, 50.21; H, 7.62.

### Synthesis of 2 from CS<sub>2</sub> and 1:

Compound **1** (29.7 mg, 0.027 mmol, 1.00 equiv.) was dissolved in 2 mL *n*-hexane in a 4 mL shell vial. From an *n*-hexane stock solution containing 20 μL CS<sub>2</sub>/1 mL, CS<sub>2</sub> (1.61 μL, 0.027 mmol, 1.00 equiv.) was added to the shell vial containing the solution of **1**, which was sealed in a 20 mL

scintillation vial. The dark green solution immediately became red. This solution was cooled to  $-40\text{ }^{\circ}\text{C}$ , affording X-ray quality, highly insoluble red crystals over several crops (10.4 mg, 34% yield). Mp  $179\text{-}182\text{ }^{\circ}\text{C}$ ;  $^1\text{H}$  NMR (700 MHz,  $d_8$ -THF):  $\delta$  30.3, 27.7, 25.3, 22.8, 20.7, 18.9, 16.7, 13.7, 6.17, 5.17,  $-7.33$ ,  $-11.3$ ,  $-12.1$ ,  $-14.0$ ,  $-21.2$ ,  $-30.7$ ,  $-37.3$ ; No  $^{13}\text{C}$  NMR spectrum was collected due to compound paramagnetism and insolubility; IR (Nujol mull on KBr): 2040 (s), 1958 (s), 1916 (s), 1309 (w), 1178 (m), 1145 (m), 1102 (m), 1074 (w), 1061 (w), 1030 (m), 979 (w), 924 (w), 775 (m), 700 (w), 662 (m), 535 (w), 508 (w). Anal. Calcd (%) for  $\text{U}_2\text{Ir}_2\text{C}_96\text{H}_{166}\text{S}$ : C, 49.93; H, 7.42; S, 5.55. Found: C, 50.28; H, 7.42; S, 5.43.

## UV/Vis/NIR Spectra

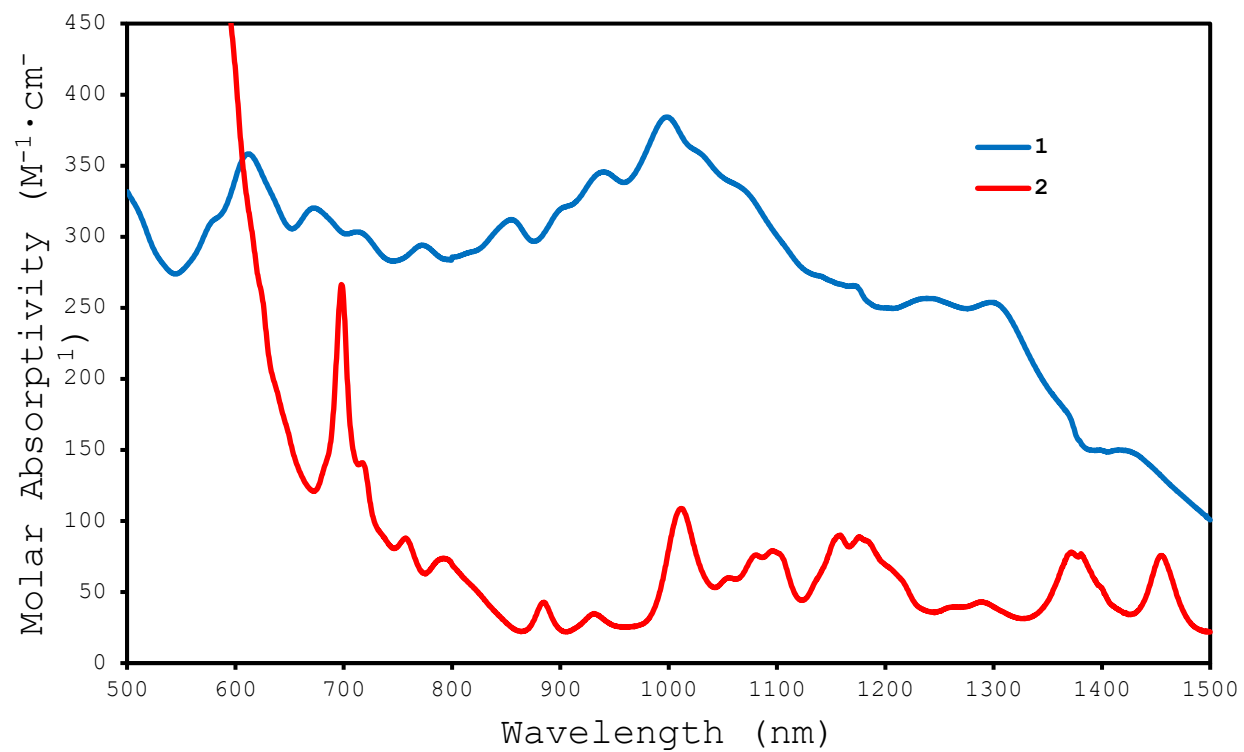

**Figure S1.** UV/Vis/NIR spectra of **1** and **2** in THF.

## IR Spectra

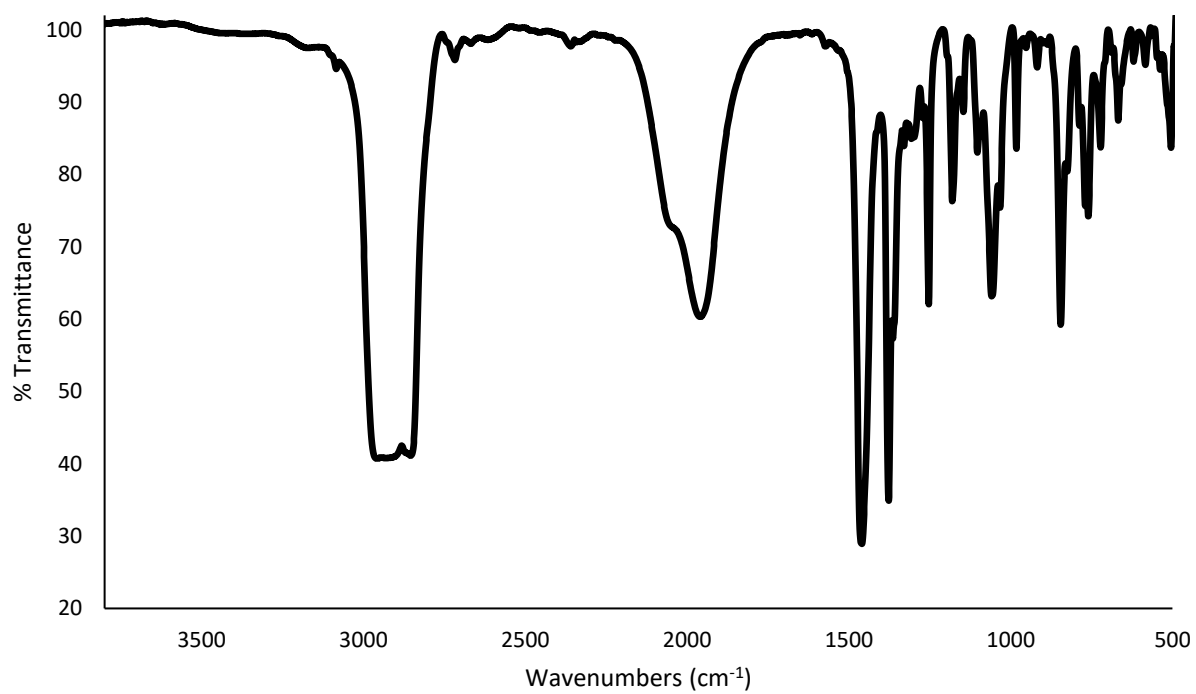

**Figure S2.** IR spectrum of **1** (Nujol mull).

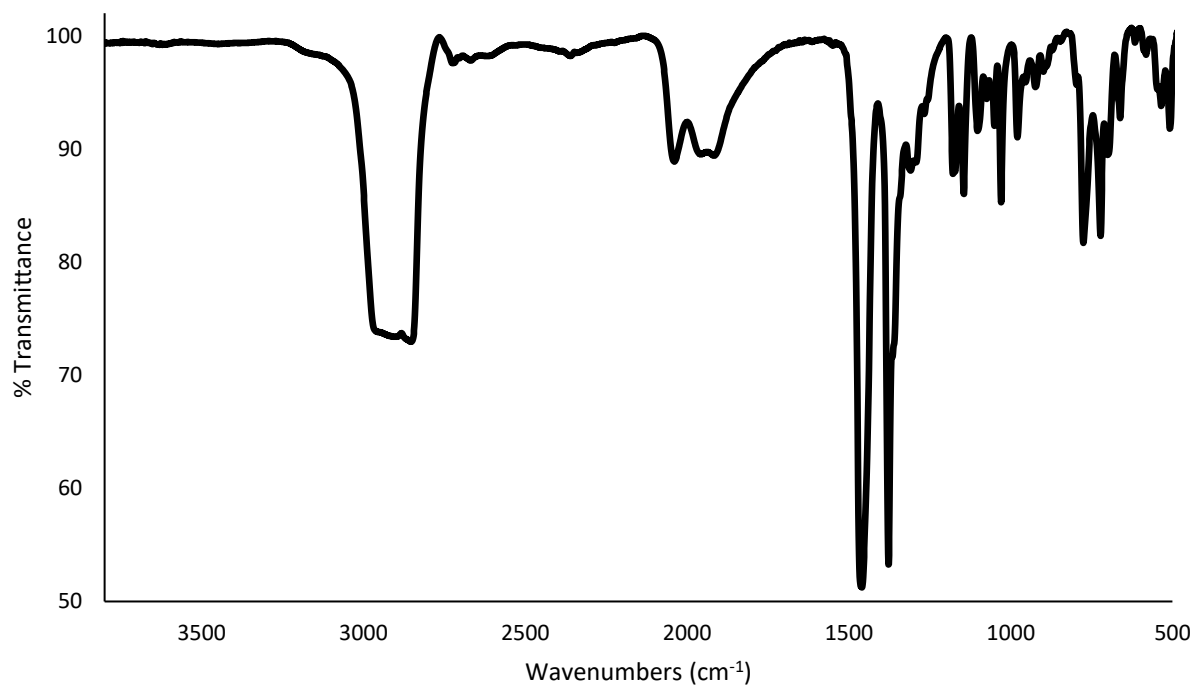

**Figure S3.** IR spectrum of **2** (Nujol mull).

# NMR Spectra

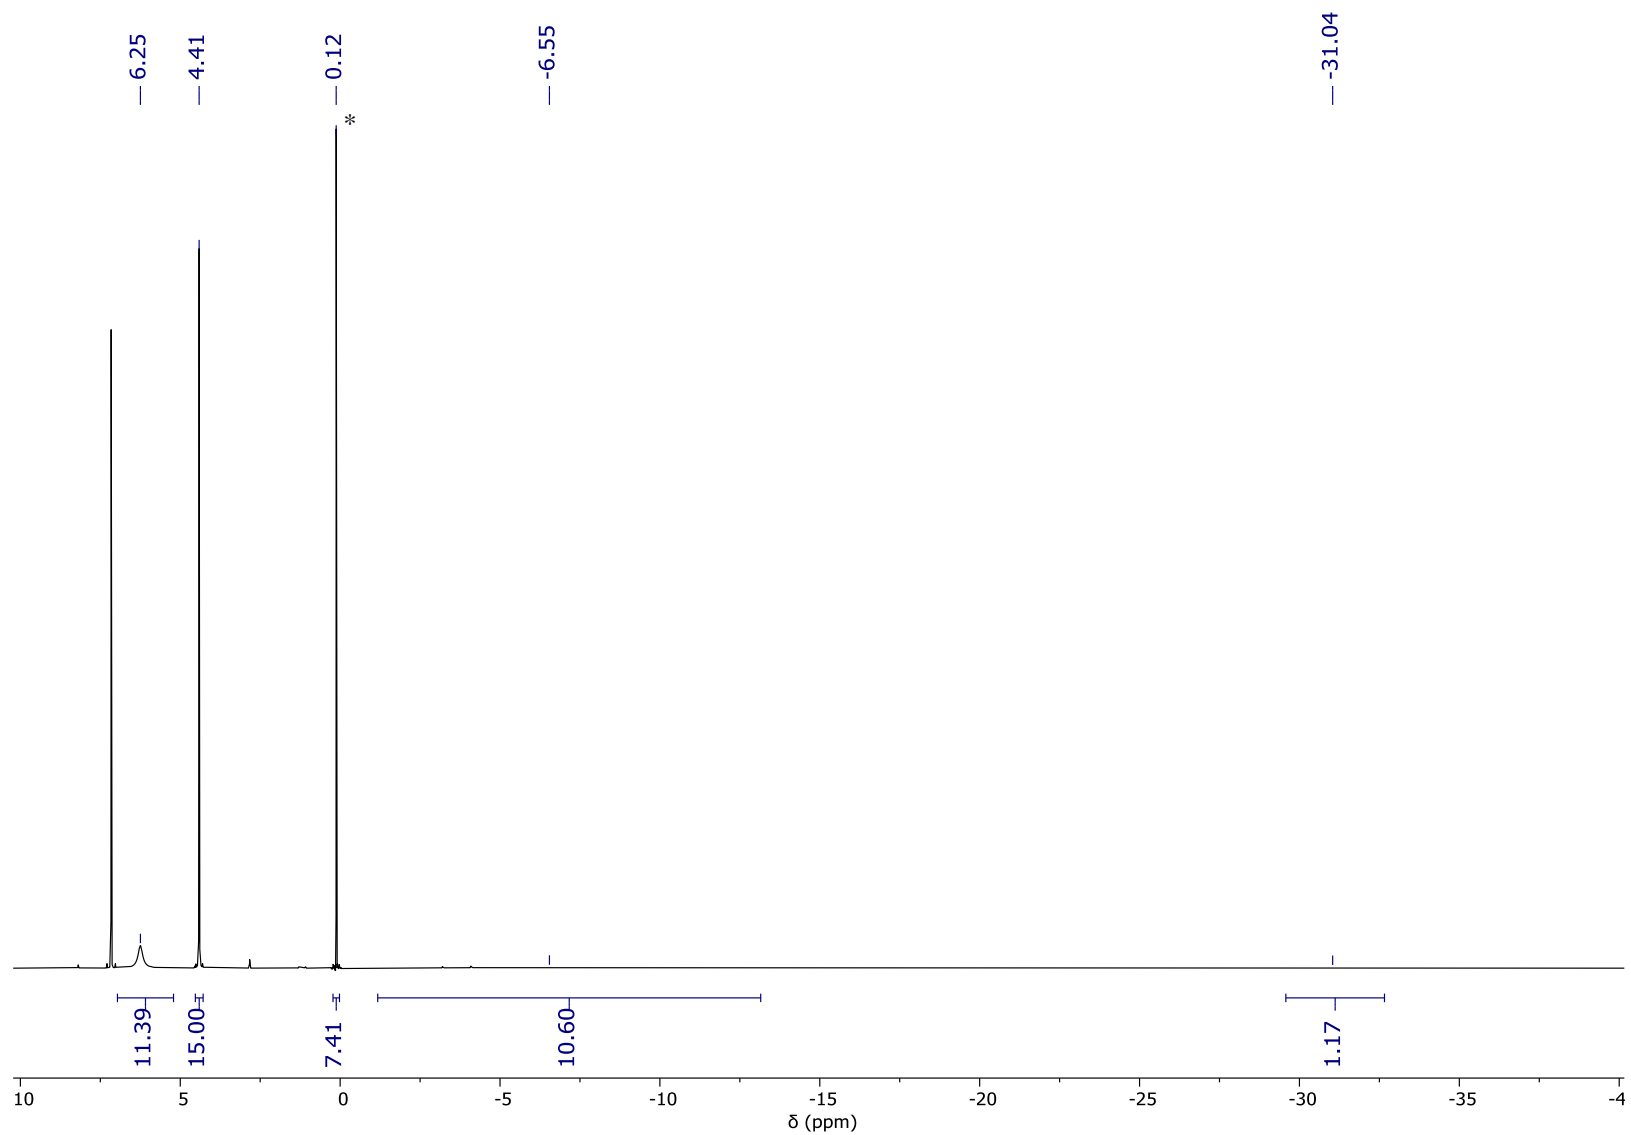

**Figure S4.**  $^1\text{H}$  NMR spectrum of **1** at 298 K in  $\text{C}_6\text{D}_6$ . \* = 0.5 equivalents of co-crystallized HMDSO.

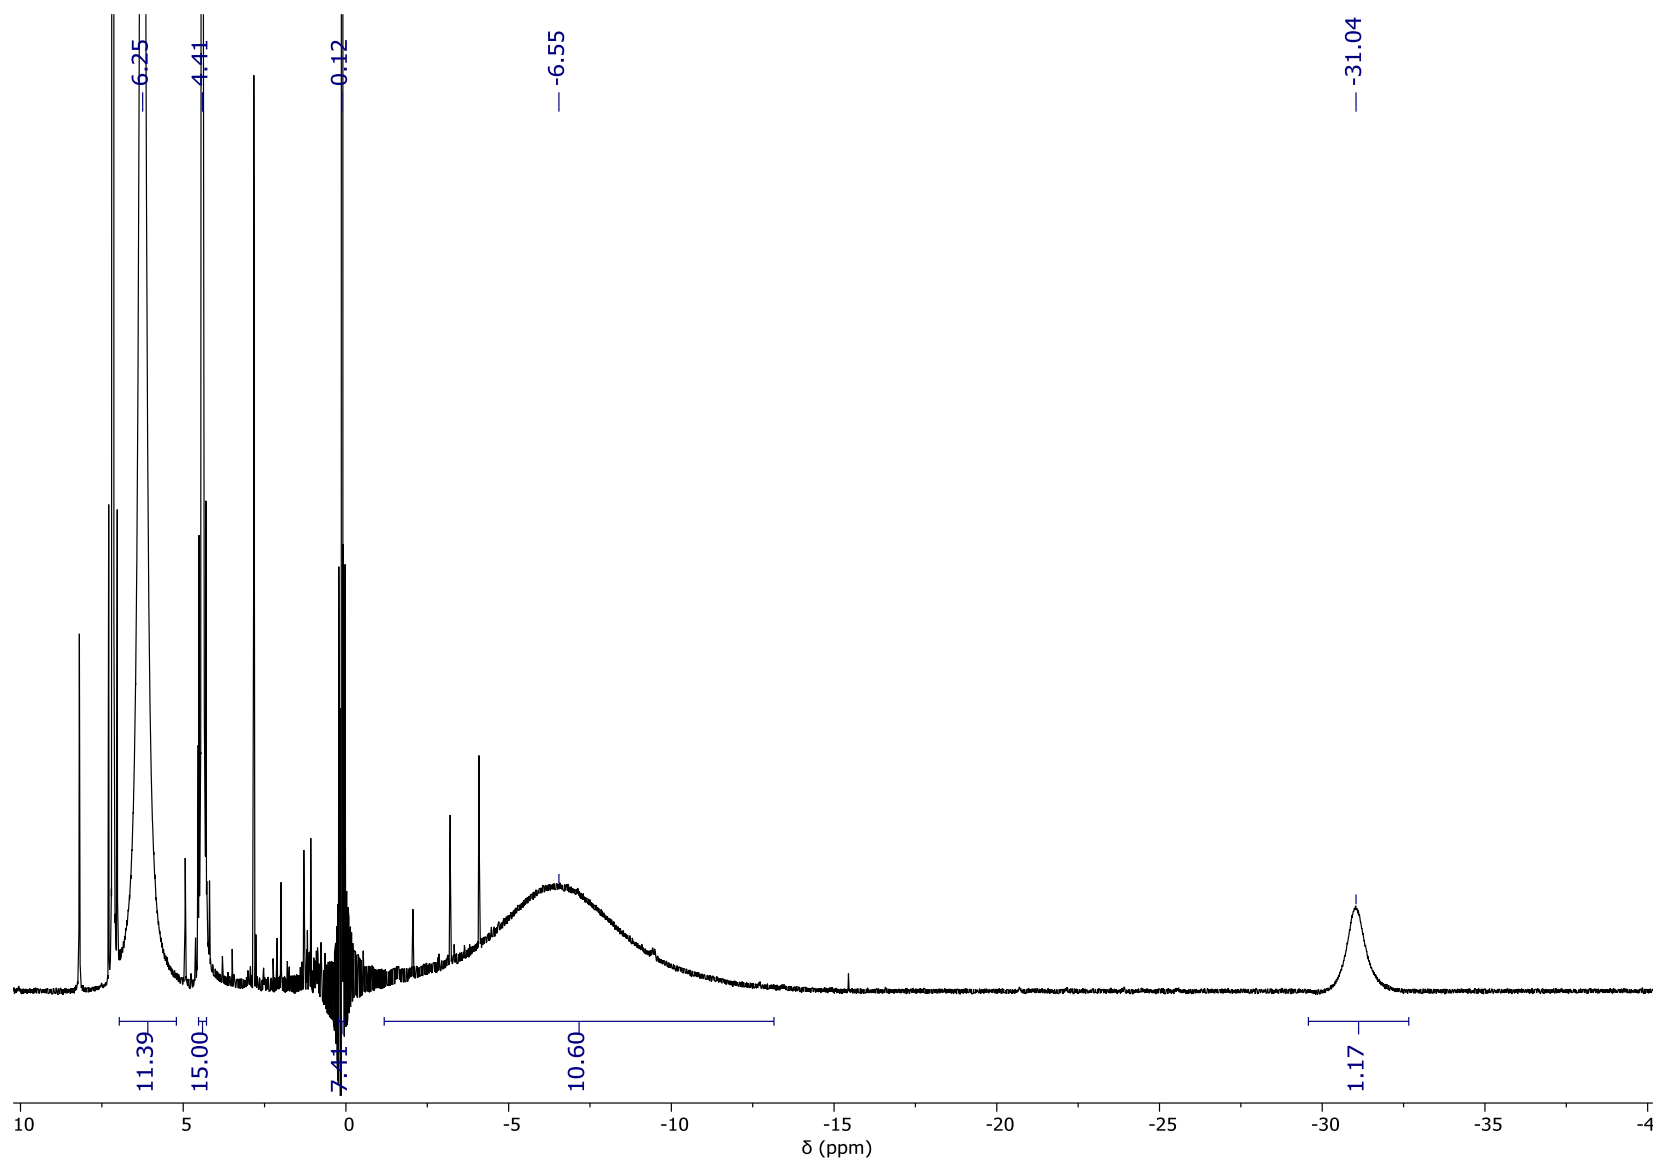

**Figure S5.**  $^1\text{H}$  NMR spectrum of **1** at 298 K in  $\text{C}_6\text{D}_6$ , zoomed in to show broad peaks. Minor impurities appear as much sharper peaks and are thus visible despite low concentrations relative to **1**. \* = 0.5 equivalents of co-crystallized HMDSO.



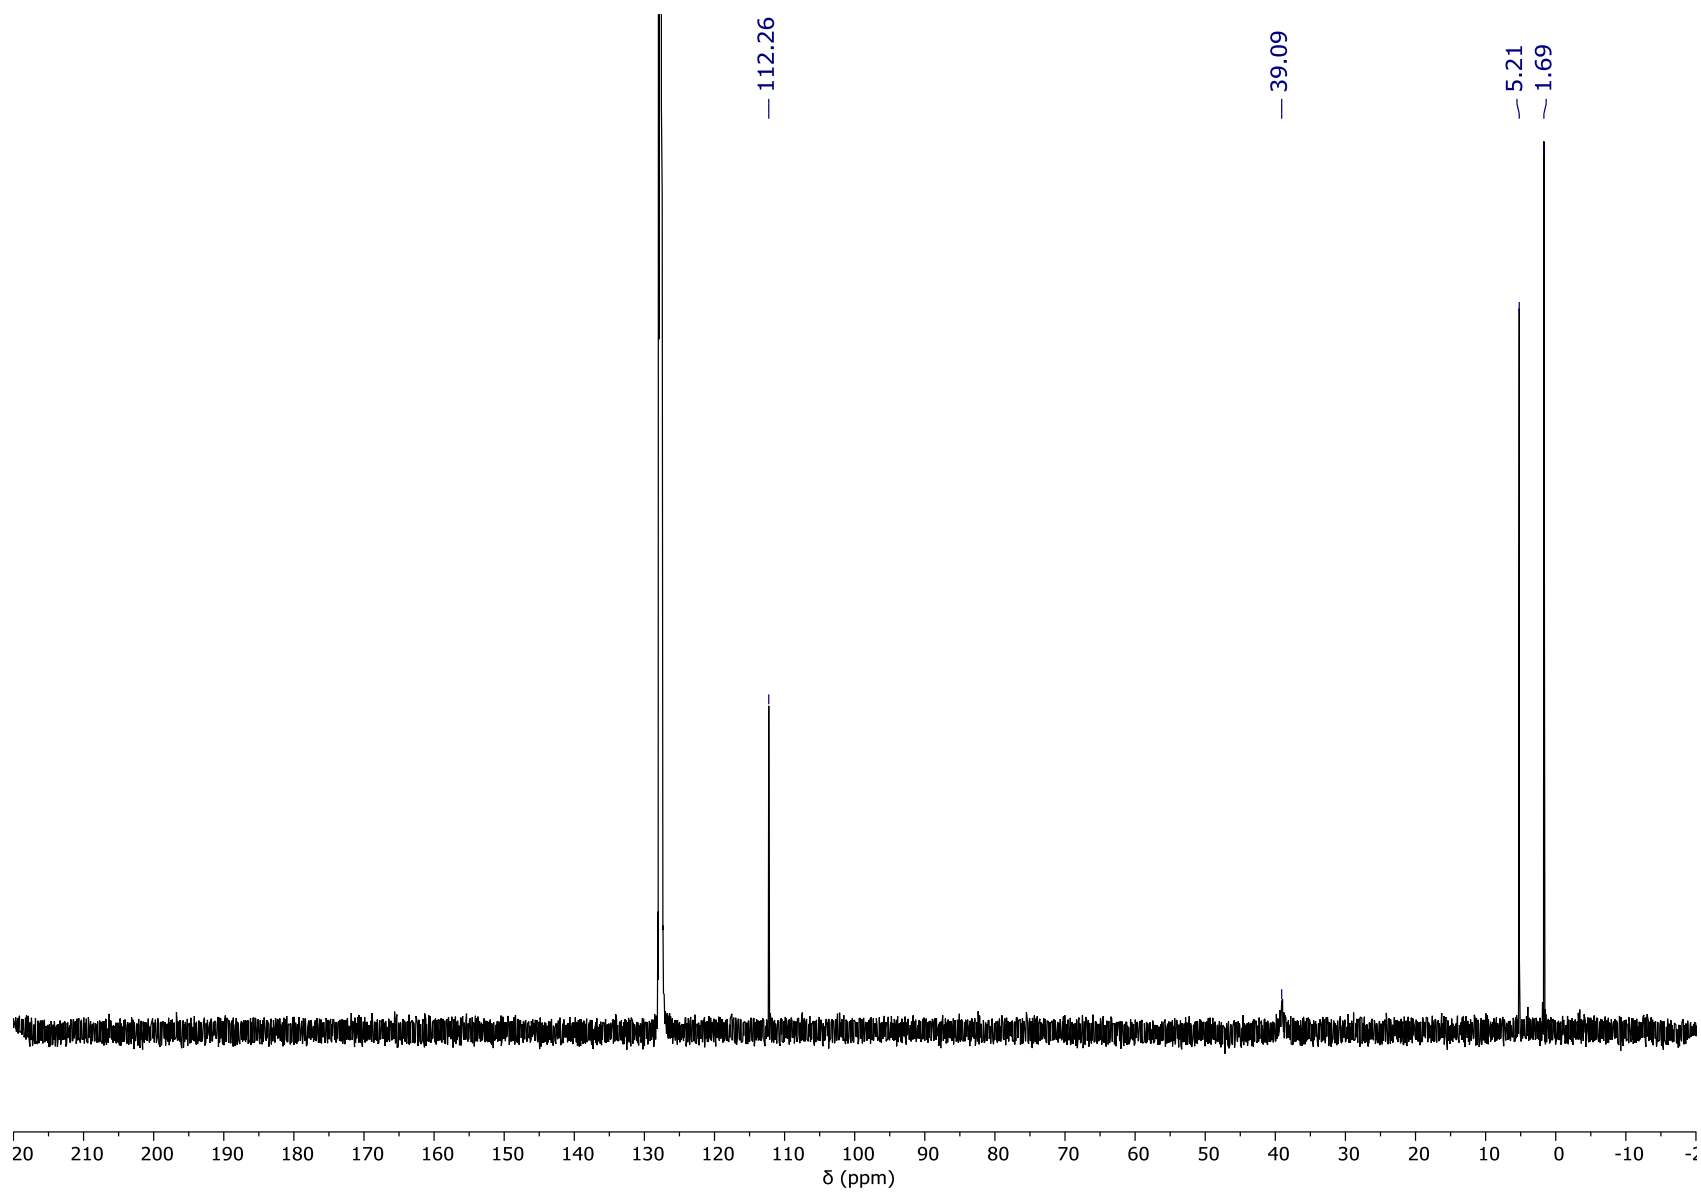

**Figure S6.**  $^{13}\text{C}\{^1\text{H}\}$  NMR spectrum of **1** at 298 K in  $\text{C}_6\text{D}_6$ .

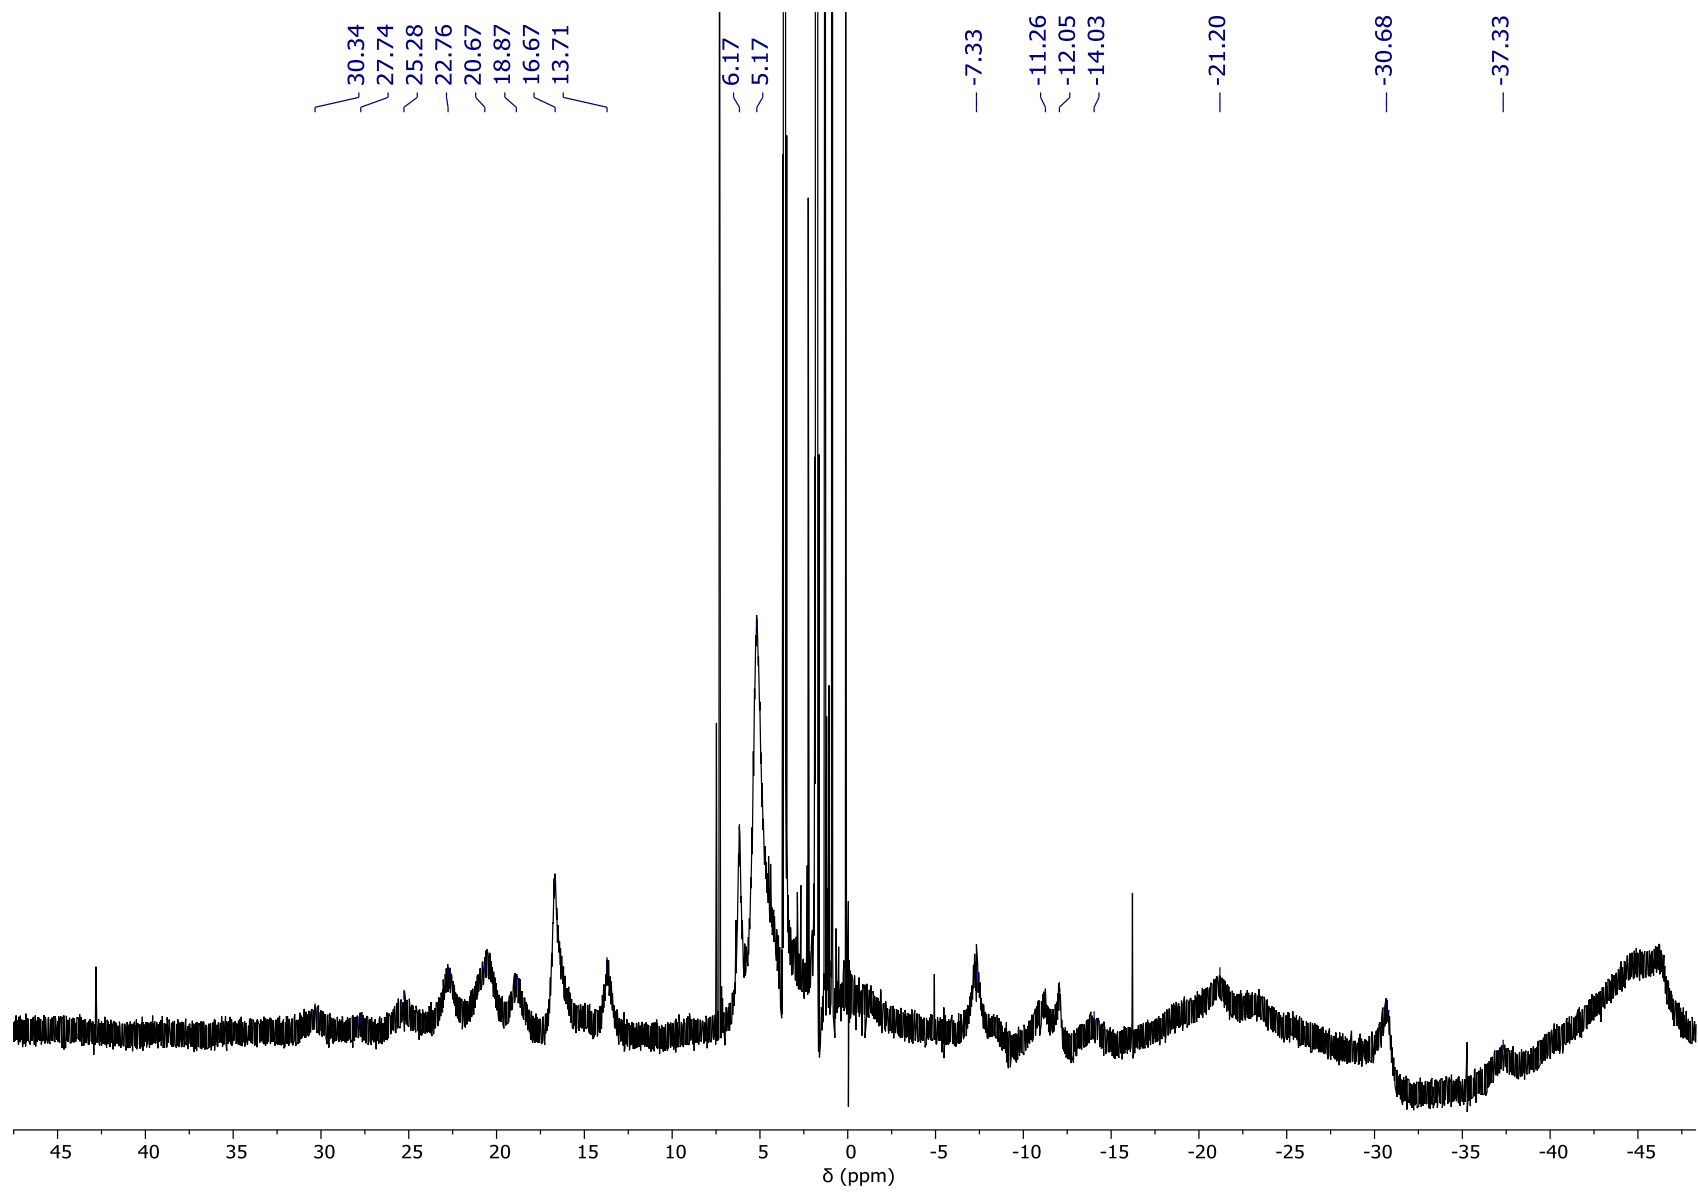

**Figure S7.**  $^1\text{H}$  NMR spectrum of **2** at 298 K in  $d_8$ -THF.

## X-ray crystallography data

In a dry nitrogen glovebox, samples of single crystals were coated in Paratone-N oil for transport to the Advanced Light Source (ALS). Crystals were mounted on a MiTeGen 10  $\mu\text{m}$  aperture Dual-Thickness MicroMount loop. X-ray diffraction data for **1** and **2** were collected at the ALS, Lawrence Berkeley National Lab, Berkeley, CA, station 12.2.1 using a silicon monochromated beam of 17 keV ( $\lambda = 0.7288 \text{ \AA}$ ) synchrotron radiation. Data was collected at 100 K, with the crystals cooled by a stream of dry nitrogen. Bruker APEX3 software was used for the data collections, Bruker SAINT v8.37A or V8.38A software was used to conduct the cell refinement and data reduction procedures,<sup>4</sup> and absorption corrections were carried out by a multi-scan method utilizing the SADABS program.<sup>4</sup> CrysAlis Pro was used for the data collections and data processing, including a multi-scan absorption correction applied using the SCALE3 ABSPACK scaling algorithm within CrysAlis Pro. Initial structure solutions were found using direct methods (SHELXT),<sup>5</sup> and refinements were carried out using SHELXL-2014,<sup>6</sup> as implemented by Olex2.<sup>7</sup> Thermal parameters for all non-hydrogen atoms were refined anisotropically. Hydrogen atoms were placed in calculated positions and refined isotropically. Thermal ellipsoid plots were made using Mercury.<sup>8</sup> The structures have been deposited to the Cambridge Crystallographic Data Centre (CCDC) with deposition numbers 2349727 (**1**) and 2349728 (**2**).

| Compound                                    | <b>1</b>                                                          | <b>2</b>                                                                       |
|---------------------------------------------|-------------------------------------------------------------------|--------------------------------------------------------------------------------|
| Empirical formula                           | C <sub>47</sub> H <sub>85</sub> IrO <sub>0.5</sub> SiU            | C <sub>96</sub> H <sub>166</sub> Ir <sub>2</sub> S <sub>4</sub> U <sub>2</sub> |
| Formula weight                              | 1116.46                                                           | 2308.98                                                                        |
| Temperature/K                               | 100.0                                                             | 100.0                                                                          |
| Crystal system                              | triclinic                                                         | monoclinic                                                                     |
| Space group                                 | P-1                                                               | C2/c                                                                           |
| a/Å                                         | 12.0803(12)                                                       | 29.472(3)                                                                      |
| b/Å                                         | 12.3459(12)                                                       | 18.083(2)                                                                      |
| c/Å                                         | 16.9963(17)                                                       | 17.948(2)                                                                      |
| α/°                                         | 105.679(4)                                                        | 90                                                                             |
| β/°                                         | 96.253(4)                                                         | 99.352(4)                                                                      |
| γ/°                                         | 96.290(4)                                                         | 90                                                                             |
| Volume/Å <sup>3</sup>                       | 2400.3(4)                                                         | 9437.7(18)                                                                     |
| Z                                           | 2                                                                 | 4                                                                              |
| ρ <sub>calc</sub> /g/cm <sup>3</sup>        | 1.545                                                             | 1.625                                                                          |
| μ/mm <sup>-1</sup>                          | 4.541                                                             | 4.687                                                                          |
| F(000)                                      | 1108.0                                                            | 4576.0                                                                         |
| Crystal size/mm <sup>3</sup>                | 0.12 × 0.04 × 0.04                                                | 0.2 × 0.1 × 0.1                                                                |
| Radiation                                   | synchrotron (λ = 0.7288)                                          | synchrotron (λ = 0.7288)                                                       |
| 2θ range for data collection/°              | 4.62 to 61.044                                                    | 4.62 to 54.194                                                                 |
| Index ranges                                | -16 ≤ h ≤ 16, -17 ≤ k ≤ 17,<br>-23 ≤ l ≤ 23                       | -36 ≤ h ≤ 36, -22 ≤ k ≤ 22,<br>-22 ≤ l ≤ 22                                    |
| Reflections collected                       | 42447                                                             | 61141                                                                          |
| Independent reflections                     | 13551 [R <sub>int</sub> = 0.0666,<br>R <sub>sigma</sub> = 0.0693] | 9655 [R <sub>int</sub> = 0.0560, R <sub>sigma</sub> =<br>0.0372]               |
| Data/restraints/parameters                  | 13551/15/535                                                      | 9655/15/524                                                                    |
| Goodness-of-fit on F <sup>2</sup>           | 1.012                                                             | 1.032                                                                          |
| Final R indexes [I >= 2σ (I)]               | R <sub>1</sub> = 0.0364, wR <sub>2</sub> = 0.0824                 | R <sub>1</sub> = 0.0336, wR <sub>2</sub> = 0.0800                              |
| Final R indexes [all data]                  | R <sub>1</sub> = 0.0461, wR <sub>2</sub> = 0.0878                 | R <sub>1</sub> = 0.0389, wR <sub>2</sub> = 0.0831                              |
| Largest diff. peak/hole / e Å <sup>-3</sup> | 0.95/-1.19                                                        | 2.26/-1.32                                                                     |
| CSD entry                                   | 2349727                                                           | 2349728                                                                        |

**Table S1.** Crystal data for complexes **1** and **2**.

## Computational details.

All DFT calculations were carried out with the Gaussian 09 suite of programs.<sup>9</sup> Geometries were fully optimized in gas phase without symmetry constraints, employing the B3PW91 functional.<sup>10,11</sup> The nature of the extrema was verified by analytical frequency calculations. The calculation of electronic energies and enthalpies of the extrema of the potential energy surface (minima and transition states) were performed at the same level of theory as the geometry optimizations. IRC calculations were performed to confirm the connections of the optimized transition states. Uranium atoms were treated with a small core effective core potential (60 MWB), associated with its adapted basis set.<sup>12,13</sup> Iridium atoms were treated with a small-core effective core potential (60 MWB), associated with its adapted basis set<sup>14</sup> augmented with a polarization function ( $\zeta_f = 0.938$ ).<sup>15</sup> For the other elements (S, H and C), Pople's triple- $\zeta$  basis set 6-311G(d,p) was used.<sup>16-18</sup> The electronic charges (at the DFT level) were computed using the natural population analysis (NPA) technique.<sup>19</sup> Dispersion corrections using the GD3-BJ approach as well as solvent effect within the SMD method were accounted for in the optimization process.

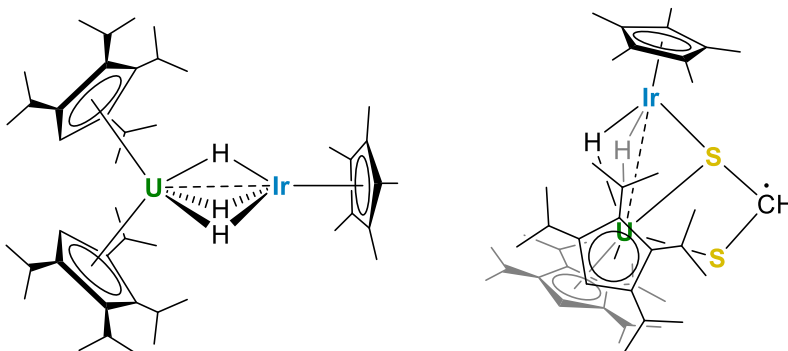

|         | <b>1</b>    | Thioformate intermediate |
|---------|-------------|--------------------------|
| Doublet | 16.0 (16.2) | 2.5 (3.1)                |
| Quartet | 0.0 (0.0)   | 0.0 (0.0)                |
| Sextet  | 61.4 (59.1) | 14.8 (0.9)               |

**Table S2.** Calculated energies ( $\Delta_rH$ ,  $\Delta_rG$  in parentheses) for electronic ground states of **1** and the calculated thioformate intermediate. Energies are given in kcal/mol.

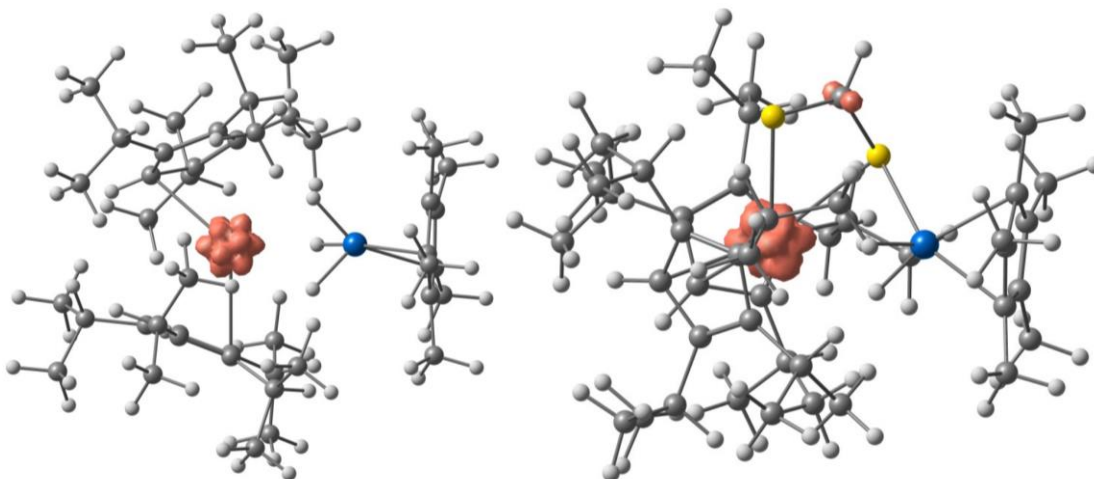

**Figure S8.** Unpaired spin density plot for **1** (left) and the calculated thioformate intermediate (right).

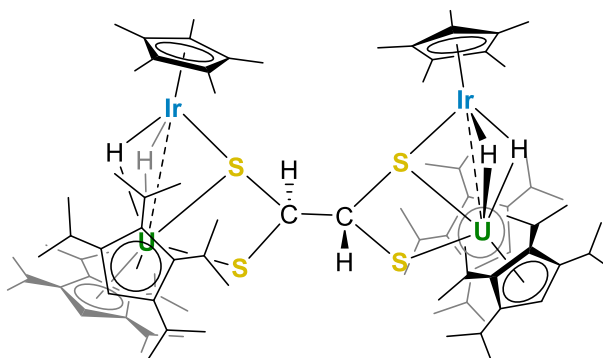

|         | <b>2</b>    |
|---------|-------------|
| Doublet | 8.8 (8.8)   |
| Quartet | 0.0 (0.0)   |
| Sextet  | 18.5 (12.8) |

**Table S3.** Calculated energies ( $\Delta_r H$ ,  $\Delta_r G$  in parentheses) for electronic ground states of **2**. Energies are given in kcal/mol.

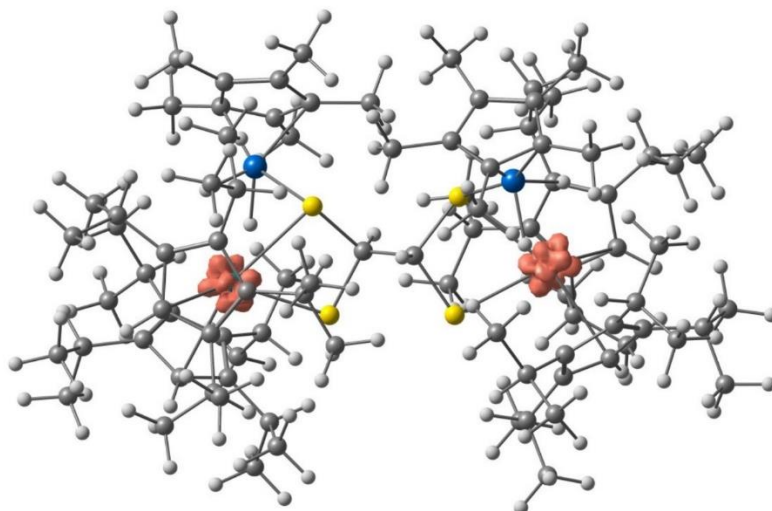

**Figure S9.** Unpaired spin density plot for **2**.

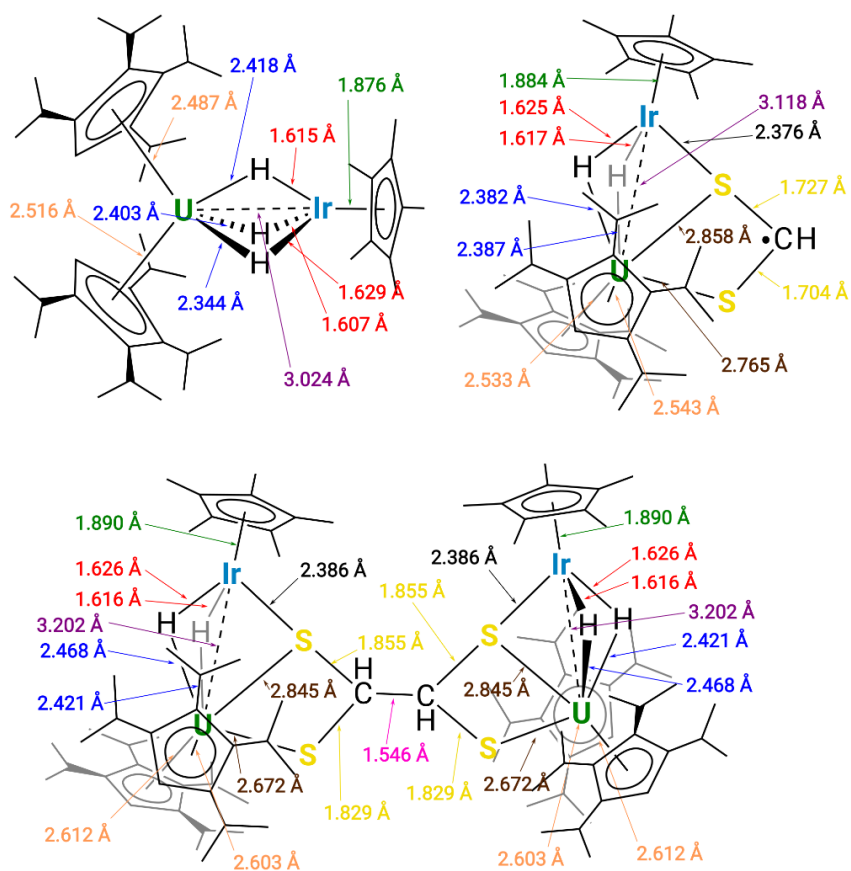

**Figure S10.** Calculated bond distances for **1** (top left), the thioformate intermediate (top right), and **2** (bottom).

**Table S4** Computed coordinates for various spin states of **1**.

122

Complex 1 - doublet

|    |          |          |          |
|----|----------|----------|----------|
| C  | 2.65404  | -0.68846 | -1.34896 |
| C  | 3.19026  | 0.64556  | -1.22805 |
| C  | 3.46363  | 0.89289  | 0.15783  |
| C  | 3.01516  | -0.23671 | 0.88354  |
| C  | 2.52864  | -1.21713 | -0.01893 |
| C  | 3.42972  | 1.71770  | -2.28451 |
| C  | 2.11156  | 2.23698  | -2.88295 |
| C  | 4.37301  | 1.97658  | 0.71357  |
| C  | 4.38128  | 2.04151  | 2.24170  |
| C  | 2.08233  | -2.60807 | 0.39600  |
| C  | 3.24328  | -3.61739 | 0.38116  |
| C  | 2.55073  | -1.60151 | -2.56710 |
| C  | 1.83117  | -1.09672 | -3.82270 |
| C  | 1.42439  | -2.62250 | 1.78087  |
| C  | 4.45053  | 1.39300  | -3.38415 |
| C  | 5.81620  | 1.75401  | 0.22354  |
| C  | 3.94394  | -2.13277 | -2.96013 |
| U  | 0.64509  | 0.80135  | -0.07891 |
| C  | 0.10956  | 3.49584  | 0.59703  |
| C  | 0.62915  | 2.86187  | 1.75581  |
| C  | -0.33233 | 1.95323  | 2.28156  |
| C  | -1.47253 | 1.99633  | 1.41222  |
| C  | -1.18682 | 2.93509  | 0.35910  |
| C  | 0.64813  | 4.80539  | 0.04291  |
| C  | 2.16776  | 4.86087  | -0.11956 |
| C  | -2.16834 | 3.33322  | -0.73826 |
| C  | -2.77471 | 4.73489  | -0.53690 |
| C  | -2.83457 | 1.33107  | 1.57801  |
| C  | -3.90123 | 2.33706  | 2.05022  |
| C  | -0.22320 | 1.32541  | 3.66492  |
| C  | -0.96740 | 2.18827  | 4.69952  |
| Ir | -1.45138 | -1.10265 | -1.22509 |
| C  | -3.43815 | -1.35925 | -2.25259 |



|   |          |          |          |
|---|----------|----------|----------|
| C | -3.47152 | -2.11814 | -1.03792 |
| C | -2.43330 | -3.12755 | -1.12825 |
| C | -1.79175 | -2.99646 | -2.39848 |
| C | -2.40139 | -1.88661 | -3.10179 |
| C | -4.51706 | -2.03770 | 0.02918  |
| C | -2.18958 | -4.20792 | -0.12028 |
| C | -0.76481 | -3.92513 | -2.96789 |
| C | -2.15429 | -1.50227 | -4.52799 |
| C | -4.39789 | -0.27377 | -2.63120 |
| C | 0.21353  | 5.96389  | 0.96220  |
| C | -1.62199 | 3.22529  | -2.17116 |
| C | 1.21611  | 1.11918  | 4.14159  |
| C | -2.89704 | 0.09534  | 2.48119  |
| H | 1.32181  | -2.94675 | -0.31984 |
| H | -0.69388 | 0.33807  | 3.65243  |
| H | 1.56032  | 3.12837  | 2.23903  |
| H | -2.99680 | 2.61772  | -0.68095 |
| H | 3.13127  | -0.37553 | 1.95107  |
| H | 0.20336  | 4.98076  | -0.94320 |
| H | 3.67910  | -3.72703 | -0.61443 |
| H | 2.90026  | -4.60709 | 0.70563  |
| H | 4.04057  | -3.29809 | 1.06179  |
| H | 2.12871  | -2.32769 | 2.56656  |
| H | 1.07030  | -3.63012 | 2.02444  |
| H | 0.55720  | -1.95420 | 1.82414  |
| H | -1.16477 | -4.58237 | -0.17484 |
| H | -2.86545 | -5.05700 | -0.28739 |
| H | -2.35493 | -3.84755 | 0.89802  |
| H | -3.65785 | 2.73824  | 3.03984  |
| H | -4.88030 | 1.84818  | 2.12322  |
| H | -4.00322 | 3.18392  | 1.36904  |
| H | -3.10877 | 4.89493  | 0.49206  |
| H | -3.63740 | 4.87400  | -1.19899 |
| H | -2.05277 | 5.52166  | -0.77608 |
| H | -3.12808 | 0.97996  | 0.57941  |
| H | 0.82231  | -0.74299 | -3.59321 |

|   |          |          |          |
|---|----------|----------|----------|
| H | 1.74555  | -1.91783 | -4.54475 |
| H | 2.37723  | -0.29698 | -4.32871 |
| H | 2.67210  | 4.73234  | 0.84395  |
| H | 2.47491  | 5.83352  | -0.51967 |
| H | 2.53783  | 4.08927  | -0.79825 |
| H | 4.05181  | 2.95843  | 0.34756  |
| H | 3.38108  | 2.18724  | 2.65230  |
| H | 5.01345  | 2.86839  | 2.58223  |
| H | 4.78859  | 1.12048  | 2.67399  |
| H | 6.18678  | 0.77981  | 0.56127  |
| H | 6.48334  | 2.52759  | 0.62189  |
| H | 5.89017  | 1.77656  | -0.86654 |
| H | 1.96837  | -2.46541 | -2.22437 |
| H | -0.51645 | 3.18541  | 4.75472  |
| H | -0.91410 | 1.73566  | 5.69686  |
| H | -2.02165 | 2.31760  | 4.44290  |
| H | -2.15590 | -0.65556 | 2.19374  |
| H | -3.88642 | -0.36384 | 2.39010  |
| H | -2.76444 | 0.34512  | 3.53724  |
| H | -0.79216 | 3.91581  | -2.35186 |
| H | -2.40824 | 3.47446  | -2.89403 |
| H | -1.28612 | 2.20741  | -2.39609 |
| H | 1.55632  | 1.45382  | -3.40422 |
| H | 2.28609  | 3.05221  | -3.59536 |
| H | 1.45581  | 2.66579  | -2.10729 |
| H | 4.55311  | -1.34996 | -3.41986 |
| H | 3.85266  | -2.95084 | -3.68489 |
| H | 4.49508  | -2.50424 | -2.09284 |
| H | 5.37603  | 0.99435  | -2.95838 |
| H | 4.70100  | 2.30186  | -3.94355 |
| H | 4.07647  | 0.66248  | -4.10472 |
| H | 1.79269  | 0.50679  | 3.44381  |
| H | 1.22114  | 0.61612  | 5.11457  |
| H | 1.73923  | 2.07299  | 4.26867  |
| H | -0.09525 | -3.40793 | -3.65882 |
| H | -1.24891 | -4.73948 | -3.52308 |

|   |          |          |          |
|---|----------|----------|----------|
| H | -0.15220 | -4.37792 | -2.18449 |
| H | -0.86546 | 5.96686  | 1.13132  |
| H | 0.49803  | 6.93201  | 0.53259  |
| H | 0.70048  | 5.87222  | 1.93927  |
| H | -4.79303 | 0.23653  | -1.74979 |
| H | -5.24898 | -0.68969 | -3.18568 |
| H | -3.92214 | 0.47771  | -3.26560 |
| H | 3.86039  | 2.56398  | -1.73571 |
| H | -2.38705 | -0.44882 | -4.70349 |
| H | -2.77724 | -2.09732 | -5.20983 |
| H | -1.11143 | -1.65979 | -4.81357 |
| H | -4.12535 | -2.35295 | 0.99891  |
| H | -5.36916 | -2.68846 | -0.21073 |
| H | -4.90121 | -1.02107 | 0.14312  |
| H | -1.52368 | 0.51163  | -1.13800 |
| H | -0.91744 | -1.01205 | 0.31567  |
| H | 0.10052  | -0.93154 | -1.62764 |

122

Complex 1 - quartet

|   |         |          |          |
|---|---------|----------|----------|
| C | 2.58576 | -0.65157 | -1.34960 |
| C | 3.18343 | 0.64775  | -1.22851 |
| C | 3.43071 | 0.89701  | 0.15259  |
| C | 2.93551 | -0.20752 | 0.87947  |
| C | 2.41836 | -1.16342 | -0.02520 |
| C | 3.44777 | 1.71008  | -2.27503 |
| C | 2.13013 | 2.27279  | -2.81604 |
| C | 4.33727 | 1.97658  | 0.69598  |
| C | 4.31173 | 2.07179  | 2.21587  |
| C | 1.85411 | -2.50821 | 0.36861  |
| C | 2.91135 | -3.61456 | 0.30501  |
| C | 2.42286 | -1.54975 | -2.56009 |
| C | 1.72071 | -0.99611 | -3.79836 |
| C | 1.21543 | -2.47788 | 1.75527  |
| C | 4.42398 | 1.34238  | -3.39108 |
| C | 5.77610 | 1.72109  | 0.22680  |
| C | 3.78269 | -2.14197 | -2.95803 |

|    |          |          |          |
|----|----------|----------|----------|
| U  | 0.64350  | 0.91995  | -0.19425 |
| C  | 0.11002  | 3.52382  | 0.62527  |
| C  | 0.64491  | 2.88776  | 1.76870  |
| C  | -0.28333 | 1.93946  | 2.26363  |
| C  | -1.42137 | 1.97027  | 1.40073  |
| C  | -1.16591 | 2.93854  | 0.37832  |
| C  | 0.65088  | 4.81518  | 0.05593  |
| C  | 2.17127  | 4.84690  | -0.06469 |
| C  | -2.12021 | 3.29128  | -0.74429 |
| C  | -2.74644 | 4.68167  | -0.58594 |
| C  | -2.75444 | 1.26165  | 1.53692  |
| C  | -3.84384 | 2.23329  | 2.00871  |
| C  | -0.15310 | 1.25399  | 3.60692  |
| C  | -0.96435 | 2.01812  | 4.66081  |
| Ir | -1.41234 | -1.04405 | -1.22396 |
| C  | -3.37402 | -1.38623 | -2.23581 |
| C  | -3.38744 | -2.11245 | -1.00428 |
| C  | -2.31873 | -3.08650 | -1.06433 |
| C  | -1.67993 | -2.96876 | -2.33348 |
| C  | -2.32454 | -1.90371 | -3.06875 |
| C  | -4.42608 | -2.02533 | 0.06060  |
| C  | -2.01848 | -4.10516 | -0.01669 |
| C  | -0.60487 | -3.85711 | -2.86194 |
| C  | -2.07422 | -1.53998 | -4.49351 |
| C  | -4.34507 | -0.32345 | -2.62776 |
| C  | 0.19411  | 5.98313  | 0.94188  |
| C  | -1.50629 | 3.16030  | -2.14202 |
| C  | 1.28775  | 1.12686  | 4.08809  |
| C  | -2.77883 | 0.01401  | 2.41509  |
| H  | 1.05647  | -2.75105 | -0.34267 |
| H  | -0.55718 | 0.24192  | 3.53460  |
| H  | 1.57548  | 3.15631  | 2.24546  |
| H  | -2.93248 | 2.55921  | -0.70009 |
| H  | 3.01908  | -0.34076 | 1.94767  |
| H  | 0.22962  | 4.96953  | -0.94147 |
| H  | 3.30979  | -3.73499 | -0.70395 |

|   |          |          |          |
|---|----------|----------|----------|
| H | 2.48662  | -4.57643 | 0.61306  |
| H | 3.75081  | -3.38841 | 0.97065  |
| H | 1.94808  | -2.24129 | 2.53274  |
| H | 0.78169  | -3.45203 | 1.99950  |
| H | 0.40890  | -1.74067 | 1.80624  |
| H | -0.97841 | -4.43127 | -0.06723 |
| H | -2.65365 | -4.99090 | -0.13931 |
| H | -2.19148 | -3.70541 | 0.98403  |
| H | -3.61333 | 2.63524  | 2.99971  |
| H | -4.81212 | 1.72402  | 2.07130  |
| H | -3.95563 | 3.07976  | 1.32992  |
| H | -3.11540 | 4.84692  | 0.42877  |
| H | -3.58691 | 4.80549  | -1.27739 |
| H | -2.02277 | 5.47041  | -0.80725 |
| H | -3.02525 | 0.92185  | 0.53096  |
| H | 0.72758  | -0.61230 | -3.55711 |
| H | 1.59928  | -1.79626 | -4.53617 |
| H | 2.29275  | -0.20750 | -4.28803 |
| H | 2.64478  | 4.69656  | 0.90958  |
| H | 2.50962  | 5.81474  | -0.44762 |
| H | 2.54573  | 4.07570  | -0.73965 |
| H | 4.02970  | 2.94916  | 0.30065  |
| H | 3.30491  | 2.24230  | 2.59250  |
| H | 4.94722  | 2.89367  | 2.55879  |
| H | 4.68763  | 1.15200  | 2.67511  |
| H | 6.12474  | 0.74806  | 0.58729  |
| H | 6.45543  | 2.49051  | 0.60987  |
| H | 5.85392  | 1.71504  | -0.86236 |
| H | 1.79964  | -2.37913 | -2.21205 |
| H | -0.56283 | 3.02952  | 4.78190  |
| H | -0.91940 | 1.51429  | 5.63263  |
| H | -2.01341 | 2.11543  | 4.37748  |
| H | -2.02603 | -0.71162 | 2.10194  |
| H | -3.75638 | -0.46520 | 2.32826  |
| H | -2.63491 | 0.24615  | 3.47148  |
| H | -0.68945 | 3.86751  | -2.30486 |

|   |          |          |          |
|---|----------|----------|----------|
| H | -2.26037 | 3.35393  | -2.91237 |
| H | -1.13739 | 2.14498  | -2.31942 |
| H | 1.51514  | 1.50827  | -3.29477 |
| H | 2.28868  | 3.07400  | -3.54527 |
| H | 1.54751  | 2.74122  | -2.00774 |
| H | 4.41692  | -1.39022 | -3.43263 |
| H | 3.65441  | -2.96745 | -3.66716 |
| H | 4.32345  | -2.51730 | -2.08722 |
| H | 5.33505  | 0.90258  | -2.97815 |
| H | 4.70690  | 2.23723  | -3.95565 |
| H | 4.00519  | 0.62921  | -4.10156 |
| H | 1.90692  | 0.59161  | 3.36849  |
| H | 1.32351  | 0.58100  | 5.03563  |
| H | 1.73862  | 2.10826  | 4.26142  |
| H | 0.02326  | -3.33530 | -3.58493 |
| H | -1.03982 | -4.72764 | -3.36769 |
| H | 0.03956  | -4.22606 | -2.06243 |
| H | -0.88627 | 5.97347  | 1.09388  |
| H | 0.47319  | 6.94660  | 0.50091  |
| H | 0.66482  | 5.91160  | 1.92737  |
| H | -4.75462 | 0.18003  | -1.75062 |
| H | -5.18281 | -0.75384 | -3.18901 |
| H | -3.87359 | 0.43350  | -3.25695 |
| H | 3.92090  | 2.53470  | -1.73294 |
| H | -2.29073 | -0.48589 | -4.67931 |
| H | -2.70367 | -2.13451 | -5.16778 |
| H | -1.03456 | -1.71640 | -4.77331 |
| H | -4.03061 | -2.34201 | 1.02633  |
| H | -5.27919 | -2.67404 | -0.17584 |
| H | -4.80532 | -1.00810 | 0.17139  |
| H | -1.53780 | 0.56515  | -1.17607 |
| H | -0.87676 | -0.87344 | 0.30463  |
| H | 0.13171  | -0.85980 | -1.63115 |

122

Complex 1 - sextet

|   |         |          |          |
|---|---------|----------|----------|
| C | 2.72829 | -0.68069 | -1.47388 |
|---|---------|----------|----------|

|    |          |          |          |
|----|----------|----------|----------|
| C  | 3.19389  | 0.63185  | -1.30903 |
| C  | 3.46610  | 0.79938  | 0.12828  |
| C  | 2.98369  | -0.35365 | 0.82572  |
| C  | 2.58358  | -1.29465 | -0.11847 |
| C  | 3.60714  | 1.70980  | -2.30716 |
| C  | 2.45452  | 2.37589  | -3.07626 |
| C  | 4.37695  | 1.83315  | 0.73589  |
| C  | 4.26631  | 1.92606  | 2.25845  |
| C  | 2.15945  | -2.70857 | 0.20455  |
| C  | 3.28386  | -3.73113 | -0.05390 |
| C  | 2.57845  | -1.54855 | -2.70805 |
| C  | 1.85155  | -0.94755 | -3.91413 |
| C  | 1.67617  | -2.85576 | 1.65156  |
| C  | 4.72409  | 1.30711  | -3.28558 |
| C  | 5.84175  | 1.53632  | 0.34619  |
| C  | 3.94299  | -2.11560 | -3.16025 |
| U  | 0.42442  | 0.86294  | 0.17200  |
| C  | -0.01724 | 3.59858  | 0.65356  |
| C  | 0.47307  | 3.00478  | 1.84625  |
| C  | -0.50218 | 2.11969  | 2.39298  |
| C  | -1.62567 | 2.14592  | 1.49716  |
| C  | -1.31231 | 3.04546  | 0.41514  |
| C  | 0.59112  | 4.83811  | 0.02464  |
| C  | 2.11326  | 4.77927  | -0.12454 |
| C  | -2.27301 | 3.40824  | -0.71098 |
| C  | -2.83983 | 4.83387  | -0.58209 |
| C  | -2.99973 | 1.50528  | 1.66363  |
| C  | -4.04128 | 2.52355  | 2.16247  |
| C  | -0.40822 | 1.53246  | 3.79253  |
| C  | -1.08719 | 2.45411  | 4.82034  |
| Ir | -1.44491 | -1.17180 | -1.13573 |
| C  | -3.42315 | -1.47669 | -2.16853 |
| C  | -3.42219 | -2.25314 | -0.95467 |
| C  | -2.35786 | -3.22373 | -1.06728 |
| C  | -1.72453 | -3.05440 | -2.34096 |
| C  | -2.38507 | -1.96137 | -3.02908 |

|   |          |          |          |
|---|----------|----------|----------|
| C | -4.45217 | -2.20385 | 0.12845  |
| C | -2.06912 | -4.30714 | -0.07461 |
| C | -0.67681 | -3.94684 | -2.92928 |
| C | -2.14512 | -1.53847 | -4.44539 |
| C | -4.41941 | -0.41438 | -2.51706 |
| C | 0.22361  | 6.08110  | 0.85827  |
| C | -1.72221 | 3.20410  | -2.13142 |
| C | 1.02889  | 1.24820  | 4.23558  |
| C | -3.06841 | 0.24924  | 2.53820  |
| H | 1.31345  | -2.95120 | -0.45125 |
| H | -0.92751 | 0.57113  | 3.80387  |
| H | 1.40251  | 3.27789  | 2.33241  |
| H | -3.12438 | 2.72360  | -0.61904 |
| H | 3.08111  | -0.52788 | 1.88758  |
| H | 0.16607  | 4.97027  | -0.97658 |
| H | 3.56350  | -3.79644 | -1.10638 |
| H | 2.95312  | -4.72602 | 0.26327  |
| H | 4.17974  | -3.47734 | 0.52331  |
| H | 2.50016  | -2.72584 | 2.36269  |
| H | 1.26964  | -3.86048 | 1.80589  |
| H | 0.89425  | -2.12704 | 1.88831  |
| H | -1.03046 | -4.64048 | -0.13573 |
| H | -2.71077 | -5.17974 | -0.25446 |
| H | -2.24749 | -3.96712 | 0.94828  |
| H | -3.78387 | 2.89545  | 3.15983  |
| H | -5.03309 | 2.05893  | 2.22688  |
| H | -4.11956 | 3.38813  | 1.49921  |
| H | -3.19171 | 5.04393  | 0.43232  |
| H | -3.68250 | 4.97430  | -1.26951 |
| H | -2.08665 | 5.58687  | -0.83377 |
| H | -3.31729 | 1.18469  | 0.66277  |
| H | 0.89417  | -0.50882 | -3.62271 |
| H | 1.66129  | -1.73885 | -4.64858 |
| H | 2.45104  | -0.18779 | -4.42040 |
| H | 2.60090  | 4.68408  | 0.85234  |
| H | 2.49374  | 5.69578  | -0.58988 |



|   |          |          |          |
|---|----------|----------|----------|
| H | 2.42140  | 3.93385  | -0.74492 |
| H | 4.12045  | 2.81476  | 0.31795  |
| H | 3.23608  | 2.08485  | 2.58078  |
| H | 4.87291  | 2.75915  | 2.62726  |
| H | 4.63480  | 1.01451  | 2.74142  |
| H | 6.14651  | 0.55550  | 0.72615  |
| H | 6.50342  | 2.29093  | 0.78475  |
| H | 5.99214  | 1.54233  | -0.73542 |
| H | 1.96998  | -2.40070 | -2.38493 |
| H | -0.59409 | 3.43257  | 4.84233  |
| H | -1.03689 | 2.02558  | 5.82874  |
| H | -2.13993 | 2.62199  | 4.57750  |
| H | -2.30728 | -0.48308 | 2.25272  |
| H | -4.05036 | -0.22157 | 2.42092  |
| H | -2.95732 | 0.48209  | 3.60128  |
| H | -0.88405 | 3.87382  | -2.34781 |
| H | -2.50515 | 3.41543  | -2.87087 |
| H | -1.37872 | 2.17576  | -2.28476 |
| H | 1.99055  | 1.69638  | -3.79259 |
| H | 2.83286  | 3.24218  | -3.63232 |
| H | 1.66590  | 2.71523  | -2.39738 |
| H | 4.53525  | -1.35609 | -3.67431 |
| H | 3.78827  | -2.94605 | -3.85828 |
| H | 4.54180  | -2.48285 | -2.32347 |
| H | 5.53365  | 0.76164  | -2.79133 |
| H | 5.15283  | 2.20394  | -3.74607 |
| H | 4.34603  | 0.68157  | -4.09821 |
| H | 1.52765  | 0.57202  | 3.53161  |
| H | 1.03622  | 0.77266  | 5.22284  |
| H | 1.62079  | 2.16710  | 4.31530  |
| H | -0.03608 | -3.40464 | -3.62906 |
| H | -1.13687 | -4.77795 | -3.48079 |
| H | -0.03690 | -4.38079 | -2.15616 |
| H | -0.85599 | 6.16759  | 1.00228  |
| H | 0.58087  | 6.99869  | 0.37493  |
| H | 0.68418  | 6.02099  | 1.85063  |

|   |          |          |          |
|---|----------|----------|----------|
| H | -4.78306 | 0.10014  | -1.62461 |
| H | -5.28698 | -0.85335 | -3.02645 |
| H | -3.98721 | 0.33807  | -3.18048 |
| H | 4.03606  | 2.50591  | -1.68717 |
| H | -2.40058 | -0.48664 | -4.59593 |
| H | -2.75250 | -2.13232 | -5.14191 |
| H | -1.09828 | -1.66524 | -4.73118 |
| H | -4.03156 | -2.49195 | 1.09465  |
| H | -5.28522 | -2.88643 | -0.09006 |
| H | -4.86870 | -1.20007 | 0.23937  |
| H | -1.67972 | 0.40957  | -0.88022 |
| H | -0.77369 | -1.20318 | 0.35668  |
| H | 0.02275  | -0.72714 | -1.65509 |

125

1 + CS2 - adduct

|   |          |          |          |
|---|----------|----------|----------|
| C | 2.61085  | -0.58106 | -1.42659 |
| C | 3.17263  | 0.73771  | -1.34112 |
| C | 3.48038  | 0.99594  | 0.02820  |
| C | 3.05014  | -0.11803 | 0.78110  |
| C | 2.51886  | -1.09202 | -0.09492 |
| C | 3.42786  | 1.77901  | -2.41346 |
| C | 2.13618  | 2.34401  | -3.01826 |
| C | 4.38794  | 2.08923  | 0.54038  |
| C | 4.37329  | 2.21237  | 2.05920  |
| C | 2.00271  | -2.44628 | 0.33258  |
| C | 3.08677  | -3.52546 | 0.25688  |
| C | 2.40156  | -1.49212 | -2.61986 |
| C | 1.65536  | -0.94767 | -3.83499 |
| C | 1.40158  | -2.41304 | 1.73603  |
| C | 4.41904  | 1.36944  | -3.50363 |
| C | 5.82327  | 1.82959  | 0.06338  |
| C | 3.73970  | -2.09937 | -3.06707 |
| S | -0.41434 | -2.21299 | 4.90844  |
| C | -1.79156 | -2.77586 | 4.46009  |
| S | -3.16894 | -3.35336 | 4.02282  |
| U | 0.67964  | 0.92586  | -0.15873 |

|    |          |          |          |
|----|----------|----------|----------|
| C  | 0.09301  | 3.53408  | 0.62815  |
| C  | 0.65975  | 2.92315  | 1.76964  |
| C  | -0.24000 | 1.95808  | 2.28544  |
| C  | -1.39286 | 1.96020  | 1.44437  |
| C  | -1.17335 | 2.92155  | 0.40776  |
| C  | 0.61142  | 4.81333  | 0.01502  |
| C  | 2.12584  | 4.83264  | -0.16153 |
| C  | -2.15079 | 3.24198  | -0.70472 |
| C  | -2.78681 | 4.62920  | -0.56044 |
| C  | -2.71362 | 1.23954  | 1.61720  |
| C  | -3.79670 | 2.20926  | 2.10708  |
| C  | -0.06205 | 1.25997  | 3.61416  |
| C  | -0.82384 | 2.00934  | 4.71313  |
| Ir | -1.36604 | -1.07752 | -1.12563 |
| C  | -3.34571 | -1.45064 | -2.09172 |
| C  | -3.32042 | -2.17322 | -0.85909 |
| C  | -2.23726 | -3.12983 | -0.93894 |
| C  | -1.63204 | -3.00918 | -2.22454 |
| C  | -2.30875 | -1.95631 | -2.94776 |
| C  | -4.33308 | -2.09772 | 0.23071  |
| C  | -1.89578 | -4.13418 | 0.10982  |
| C  | -0.55886 | -3.88600 | -2.77553 |
| C  | -2.09900 | -1.59082 | -4.37867 |
| C  | -4.33987 | -0.40292 | -2.46622 |
| C  | 0.18720  | 6.00096  | 0.88988  |
| C  | -1.55980 | 3.08934  | -2.11052 |
| C  | 1.39696  | 1.10227  | 4.02601  |
| C  | -2.70906 | 0.00159  | 2.50782  |
| H  | 1.19199  | -2.72143 | -0.35144 |
| H  | -0.48140 | 0.25512  | 3.54144  |
| H  | 1.58846  | 3.21884  | 2.23369  |
| H  | -2.95501 | 2.50333  | -0.63222 |
| H  | 3.18940  | -0.24424 | 1.84434  |
| H  | 0.15580  | 4.94563  | -0.97043 |
| H  | 3.45705  | -3.65511 | -0.76148 |
| H  | 2.69750  | -4.49201 | 0.59560  |

|   |          |          |          |
|---|----------|----------|----------|
| H | 3.93949  | -3.26425 | 0.89215  |
| H | 2.15036  | -2.15446 | 2.49066  |
| H | 0.99245  | -3.39181 | 2.00156  |
| H | 0.58181  | -1.69199 | 1.80216  |
| H | -0.86026 | -4.46604 | 0.01938  |
| H | -2.53965 | -5.01861 | 0.03119  |
| H | -2.02158 | -3.71712 | 1.11013  |
| H | -3.54257 | 2.61817  | 3.08958  |
| H | -4.76112 | 1.69671  | 2.19667  |
| H | -3.92744 | 3.05079  | 1.42537  |
| H | -3.14525 | 4.80629  | 0.45604  |
| H | -3.63596 | 4.73673  | -1.24391 |
| H | -2.07184 | 5.42014  | -0.80108 |
| H | -3.00462 | 0.88725  | 0.62119  |
| H | 0.68433  | -0.53203 | -3.55813 |
| H | 1.47735  | -1.76036 | -4.54718 |
| H | 2.22722  | -0.18791 | -4.36913 |
| H | 2.63321  | 4.72412  | 0.80107  |
| H | 2.45572  | 5.77838  | -0.60257 |
| H | 2.46869  | 4.02619  | -0.81165 |
| H | 4.07400  | 3.05209  | 0.12810  |
| H | 3.36383  | 2.35448  | 2.44205  |
| H | 4.98392  | 3.06092  | 2.38180  |
| H | 4.78416  | 1.31455  | 2.53180  |
| H | 6.17665  | 0.86218  | 0.43424  |
| H | 6.50438  | 2.60540  | 0.43011  |
| H | 5.89111  | 1.80963  | -1.02627 |
| H | 1.78855  | -2.31417 | -2.23847 |
| H | -0.40094 | 3.00987  | 4.85074  |
| H | -0.76003 | 1.47757  | 5.66887  |
| H | -1.87922 | 2.13169  | 4.46334  |
| H | -1.95960 | -0.72176 | 2.18206  |
| H | -3.68510 | -0.48322 | 2.44838  |
| H | -2.54185 | 0.24363  | 3.55871  |
| H | -0.76642 | 3.81432  | -2.30783 |
| H | -2.33296 | 3.24115  | -2.87126 |

|              |          |          |          |
|--------------|----------|----------|----------|
| H            | -1.16643 | 2.07936  | -2.26670 |
| H            | 1.54817  | 1.58124  | -3.52934 |
| H            | 2.34931  | 3.13955  | -3.73964 |
| H            | 1.50012  | 2.80756  | -2.25179 |
| H            | 4.34835  | -1.36759 | -3.60233 |
| H            | 3.57330  | -2.94932 | -3.73836 |
| H            | 4.32608  | -2.44536 | -2.21407 |
| H            | 5.31020  | 0.91011  | -3.06948 |
| H            | 4.73534  | 2.24673  | -4.07799 |
| H            | 3.98934  | 0.65751  | -4.20972 |
| H            | 1.96820  | 0.55645  | 3.27391  |
| H            | 1.46855  | 0.55378  | 4.97024  |
| H            | 1.87816  | 2.07235  | 4.17976  |
| H            | 0.04870  | -3.35877 | -3.51212 |
| H            | -0.99596 | -4.76091 | -3.27175 |
| H            | 0.10591  | -4.24893 | -1.99003 |
| H            | -0.88879 | 6.00083  | 1.07228  |
| H            | 0.45939  | 6.95391  | 0.42251  |
| H            | 0.68534  | 5.94554  | 1.86281  |
| H            | -4.74283 | 0.09404  | -1.58234 |
| H            | -5.18006 | -0.84604 | -3.01376 |
| H            | -3.89095 | 0.36107  | -3.10341 |
| H            | 3.89818  | 2.61558  | -1.88702 |
| H            | -2.31175 | -0.53414 | -4.55415 |
| H            | -2.75378 | -2.17793 | -5.03509 |
| H            | -1.06988 | -1.77448 | -4.69043 |
| H            | -3.90431 | -2.39199 | 1.18865  |
| H            | -5.17575 | -2.77013 | 0.02500  |
| H            | -4.73384 | -1.08875 | 0.33987  |
| H            | -1.50988 | 0.52965  | -1.08919 |
| H            | -0.81445 | -0.88639 | 0.39462  |
| H            | 0.16988  | -0.88097 | -1.55740 |
| 125          |          |          |          |
| 1 + CS2 - TS |          |          |          |
| C            | 9.35801  | 5.10917  | 3.46985  |
| C            | 9.84323  | 6.41783  | 3.83415  |

|    |          |          |         |
|----|----------|----------|---------|
| C  | 10.20215 | 6.37193  | 5.22809 |
| C  | 9.93079  | 5.06447  | 5.69667 |
| C  | 9.43542  | 4.27452  | 4.63408 |
| C  | 10.30515 | 7.57234  | 2.94874 |
| C  | 9.23476  | 8.38750  | 2.21595 |
| C  | 11.04967 | 7.36926  | 5.99977 |
| C  | 10.89432 | 7.24447  | 7.51762 |
| C  | 9.39626  | 2.75406  | 4.64973 |
| C  | 10.83017 | 2.21638  | 4.82222 |
| C  | 9.01169  | 4.48653  | 2.11906 |
| C  | 8.29740  | 5.35488  | 1.08289 |
| C  | 8.48805  | 2.11020  | 5.69772 |
| C  | 11.41827 | 7.16727  | 1.96759 |
| C  | 12.53625 | 7.20739  | 5.63281 |
| C  | 10.22237 | 3.79354  | 1.46510 |
| S  | 7.54910  | 4.86201  | 7.86264 |
| C  | 6.26391  | 3.97696  | 7.31877 |
| S  | 5.34795  | 2.77052  | 7.88443 |
| U  | 7.38958  | 6.12745  | 5.40096 |
| C  | 7.02879  | 9.03434  | 5.43534 |
| C  | 7.38013  | 8.62660  | 6.74824 |
| C  | 6.29674  | 7.94194  | 7.35740 |
| C  | 5.27423  | 7.81041  | 6.36011 |
| C  | 5.74062  | 8.47195  | 5.15995 |
| C  | 7.61784  | 10.29089 | 4.80593 |
| C  | 9.12987  | 10.45908 | 4.95663 |
| C  | 4.87681  | 8.68677  | 3.91888 |
| C  | 4.30448  | 10.11144 | 3.78334 |
| C  | 3.84712  | 7.28279  | 6.50239 |
| C  | 2.80821  | 8.41755  | 6.59291 |
| C  | 6.19217  | 7.74640  | 8.86487 |
| C  | 5.27851  | 8.82704  | 9.47308 |
| Ir | 5.31373  | 4.39737  | 4.13731 |
| C  | 3.20997  | 4.25173  | 3.32470 |
| C  | 3.33947  | 3.25861  | 4.33729 |
| C  | 4.37833  | 2.32691  | 3.92579 |

|   |          |          |         |
|---|----------|----------|---------|
| C | 4.87754  | 2.75679  | 2.66189 |
| C | 4.17518  | 3.96597  | 2.28369 |
| C | 2.47173  | 3.08494  | 5.53999 |
| C | 4.71657  | 1.05759  | 4.63670 |
| C | 5.86587  | 2.02822  | 1.80657 |
| C | 4.26319  | 4.65555  | 0.96000 |
| C | 2.18362  | 5.33987  | 3.27246 |
| C | 6.95471  | 11.52027 | 5.46522 |
| C | 5.53655  | 8.30692  | 2.58728 |
| C | 7.53632  | 7.81184  | 9.59587 |
| C | 3.58798  | 6.29425  | 7.64174 |
| H | 9.03512  | 2.41818  | 3.67097 |
| H | 5.75293  | 6.76715  | 9.08274 |
| H | 8.27185  | 8.95203  | 7.26942 |
| H | 4.01969  | 8.01330  | 4.03427 |
| H | 10.17020 | 4.69021  | 6.68378 |
| H | 7.37687  | 10.31635 | 3.73650 |
| H | 11.52483 | 2.65631  | 4.10060 |
| H | 10.85290 | 1.12696  | 4.70230 |
| H | 11.20803 | 2.44898  | 5.82388 |
| H | 8.77169  | 2.40089  | 6.71420 |
| H | 8.56215  | 1.01799  | 5.63677 |
| H | 7.44325  | 2.38796  | 5.54227 |
| H | 5.67120  | 0.64845  | 4.29871 |
| H | 3.94381  | 0.29963  | 4.45169 |
| H | 4.77925  | 1.21412  | 5.71743 |
| H | 2.98532  | 9.05554  | 7.46422 |
| H | 1.80077  | 7.99601  | 6.69258 |
| H | 2.81026  | 9.05919  | 5.71082 |
| H | 3.89043  | 10.48970 | 4.72146 |
| H | 3.50421  | 10.12204 | 3.03400 |
| H | 5.06888  | 10.81844 | 3.44771 |
| H | 3.63527  | 6.72682  | 5.57960 |
| H | 7.45957  | 5.90462  | 1.52001 |
| H | 7.90086  | 4.71474  | 0.28566 |
| H | 8.97098  | 6.06713  | 0.60063 |

|   |          |          |          |
|---|----------|----------|----------|
| H | 9.41976  | 10.48776 | 6.01247  |
| H | 9.44898  | 11.40699 | 4.50984  |
| H | 9.68689  | 9.65884  | 4.47349  |
| H | 10.74885 | 8.38658  | 5.72921  |
| H | 9.85164  | 7.34688  | 7.82759  |
| H | 11.47362 | 8.02331  | 8.02500  |
| H | 11.26176 | 6.27910  | 7.88257  |
| H | 12.88478 | 6.20136  | 5.89127  |
| H | 13.15131 | 7.93039  | 6.18124  |
| H | 12.71520 | 7.35669  | 4.56497  |
| H | 8.29818  | 3.68986  | 2.36008  |
| H | 5.69074  | 9.82481  | 9.28546  |
| H | 5.19771  | 8.69346  | 10.55810 |
| H | 4.26943  | 8.80311  | 9.05806  |
| H | 4.29463  | 5.46493  | 7.63938  |
| H | 2.58509  | 5.86783  | 7.52838  |
| H | 3.61710  | 6.77177  | 8.62445  |
| H | 6.38046  | 8.95898  | 2.34813  |
| H | 4.81345  | 8.40753  | 1.76845  |
| H | 5.88548  | 7.26984  | 2.59226  |
| H | 8.80873  | 7.85374  | 1.36669  |
| H | 9.66899  | 9.31839  | 1.83250  |
| H | 8.41720  | 8.64944  | 2.88764  |
| H | 10.99870 | 4.51036  | 1.18602  |
| H | 9.90965  | 3.27064  | 0.55325  |
| H | 10.67842 | 3.05723  | 2.13044  |
| H | 12.18789 | 6.56018  | 2.45320  |
| H | 11.89979 | 8.06136  | 1.55488  |
| H | 11.02388 | 6.59485  | 1.12405  |
| H | 8.24729  | 7.06517  | 9.23586  |
| H | 7.38467  | 7.62721  | 10.66437 |
| H | 7.99920  | 8.80035  | 9.50003  |
| H | 6.42963  | 2.71732  | 1.17410  |
| H | 5.35039  | 1.31733  | 1.14821  |
| H | 6.58132  | 1.46618  | 2.41084  |
| H | 5.86562  | 11.46712 | 5.44852  |



|   |          |          |         |
|---|----------|----------|---------|
| H | 7.26216  | 12.44198 | 4.95689 |
| H | 7.26536  | 11.59433 | 6.51302 |
| H | 1.85442  | 5.63059  | 4.27242 |
| H | 1.30001  | 5.00605  | 2.71359 |
| H | 2.57146  | 6.23311  | 2.77703 |
| H | 10.77880 | 8.27125  | 3.64660 |
| H | 3.98638  | 5.70949  | 1.03782 |
| H | 3.58471  | 4.18700  | 0.23400 |
| H | 5.27367  | 4.60847  | 0.54826 |
| H | 3.06581  | 2.82163  | 6.42024 |
| H | 1.74454  | 2.27964  | 5.37117 |
| H | 1.91316  | 3.99493  | 5.76869 |
| H | 5.28214  | 5.99764  | 4.34617 |
| H | 5.85434  | 4.29191  | 5.84324 |
| H | 6.87512  | 4.50831  | 3.75450 |

125

1+ CS2 - product

|   |          |          |          |
|---|----------|----------|----------|
| C | 2.53198  | -0.62330 | -1.44148 |
| C | 3.07043  | 0.65825  | -1.10402 |
| C | 3.43585  | 0.61806  | 0.28238  |
| C | 3.13766  | -0.67033 | 0.77486  |
| C | 2.60325  | -1.44628 | -0.27189 |
| C | 3.50419  | 1.80458  | -1.99442 |
| C | 2.39913  | 2.62691  | -2.65445 |
| C | 4.24381  | 1.64325  | 1.03948  |
| C | 4.02240  | 1.57108  | 2.54655  |
| C | 2.51109  | -2.95532 | -0.25707 |
| C | 3.94335  | -3.51280 | -0.23298 |
| C | 2.06498  | -1.23008 | -2.74988 |
| C | 1.35722  | -0.32240 | -3.74441 |
| C | 1.71370  | -3.57381 | 0.88285  |
| C | 4.54986  | 1.36686  | -3.02352 |
| C | 5.73182  | 1.46679  | 0.71459  |
| C | 3.18769  | -1.99923 | -3.45653 |
| S | 0.52007  | -0.98677 | 2.74563  |
| C | -0.73568 | -2.12170 | 2.52328  |

|    |          |          |          |
|----|----------|----------|----------|
| S  | -1.28083 | -3.24313 | 3.59899  |
| U  | 0.72469  | 0.52146  | 0.39873  |
| C  | 0.25651  | 3.33019  | 0.41902  |
| C  | 0.58710  | 2.92712  | 1.73555  |
| C  | -0.47245 | 2.17710  | 2.29352  |
| C  | -1.45252 | 2.01564  | 1.26737  |
| C  | -0.99055 | 2.72313  | 0.09993  |
| C  | 0.85981  | 4.56977  | -0.20500 |
| C  | 2.36775  | 4.69827  | -0.02225 |
| C  | -1.83895 | 2.94000  | -1.13893 |
| C  | -2.50891 | 4.32265  | -1.14911 |
| C  | -2.82674 | 1.37622  | 1.35866  |
| C  | -3.95275 | 2.41963  | 1.35776  |
| C  | -0.60185 | 1.92935  | 3.78050  |
| C  | -1.52232 | 2.99981  | 4.38062  |
| Ir | -1.33823 | -1.14600 | -0.85637 |
| C  | -3.45525 | -1.29251 | -1.57284 |
| C  | -3.25467 | -2.29349 | -0.55701 |
| C  | -2.22853 | -3.18700 | -0.99147 |
| C  | -1.78587 | -2.74945 | -2.29252 |
| C  | -2.54967 | -1.57945 | -2.64778 |
| C  | -4.04534 | -2.45574 | 0.69219  |
| C  | -1.79776 | -4.42395 | -0.28054 |
| C  | -0.82696 | -3.47417 | -3.16927 |
| C  | -2.48332 | -0.85250 | -3.94536 |
| C  | -4.51514 | -0.24344 | -1.58068 |
| C  | 0.19783  | 5.79914  | 0.44083  |
| C  | -1.14102 | 2.74230  | -2.48379 |
| C  | 0.73248  | 1.94782  | 4.51853  |
| C  | -3.04984 | 0.43482  | 2.53655  |
| H  | 2.04077  | -3.27058 | -1.19319 |
| H  | -1.04579 | 0.94850  | 3.95113  |
| H  | 1.45540  | 3.26707  | 2.28155  |
| H  | -2.62741 | 2.18330  | -1.09079 |
| H  | 3.33780  | -1.02924 | 1.77372  |
| H  | 0.63605  | 4.59068  | -1.27478 |

|   |          |          |          |
|---|----------|----------|----------|
| H | 4.58541  | -3.03285 | -0.97501 |
| H | 3.94274  | -4.59140 | -0.42119 |
| H | 4.39669  | -3.34513 | 0.74894  |
| H | 2.07281  | -3.24196 | 1.85960  |
| H | 1.79844  | -4.66465 | 0.84771  |
| H | 0.65923  | -3.31467 | 0.81733  |
| H | -0.76994 | -4.69078 | -0.52903 |
| H | -2.43858 | -5.26859 | -0.56096 |
| H | -1.85913 | -4.30878 | 0.80375  |
| H | -3.81023 | 3.15415  | 2.15591  |
| H | -4.91637 | 1.92906  | 1.53079  |
| H | -4.02690 | 2.96161  | 0.41645  |
| H | -2.90090 | 4.60457  | -0.17097 |
| H | -3.33645 | 4.33803  | -1.86622 |
| H | -1.79894 | 5.09372  | -1.45864 |
| H | -2.93520 | 0.76918  | 0.45047  |
| H | 0.56194  | 0.25231  | -3.26798 |
| H | 0.89855  | -0.93639 | -4.52586 |
| H | 2.04332  | 0.35978  | -4.24718 |
| H | 2.63211  | 4.73757  | 1.03835  |
| H | 2.72953  | 5.62344  | -0.48063 |
| H | 2.90842  | 3.87087  | -0.47418 |
| H | 3.94659  | 2.64269  | 0.71415  |
| H | 2.96825  | 1.68282  | 2.80578  |
| H | 4.57390  | 2.36788  | 3.05406  |
| H | 4.36748  | 0.61916  | 2.96008  |
| H | 6.07536  | 0.47756  | 1.03243  |
| H | 6.33514  | 2.22011  | 1.23160  |
| H | 5.92414  | 1.55538  | -0.35723 |
| H | 1.31248  | -1.96422 | -2.44990 |
| H | -1.08137 | 3.99460  | 4.25829  |
| H | -1.67400 | 2.82364  | 5.45053  |
| H | -2.50151 | 3.01431  | 3.89887  |
| H | -2.27239 | -0.32042 | 2.62196  |
| H | -4.00288 | -0.08336 | 2.41152  |
| H | -3.11009 | 0.97241  | 3.48406  |

|   |          |          |          |
|---|----------|----------|----------|
| H | -0.36682 | 3.49120  | -2.65987 |
| H | -1.86978 | 2.84026  | -3.29516 |
| H | -0.69048 | 1.75311  | -2.56623 |
| H | 1.95952  | 2.12590  | -3.51355 |
| H | 2.79610  | 3.58605  | -3.00195 |
| H | 1.59665  | 2.83854  | -1.95017 |
| H | 3.99616  | -1.33467 | -3.76892 |
| H | 2.79884  | -2.49694 | -4.35146 |
| H | 3.62173  | -2.76520 | -2.81383 |
| H | 5.34227  | 0.77456  | -2.55942 |
| H | 5.00990  | 2.24230  | -3.49349 |
| H | 4.10409  | 0.76569  | -3.81819 |
| H | 1.40548  | 1.16914  | 4.15712  |
| H | 0.56824  | 1.75883  | 5.58300  |
| H | 1.23367  | 2.91695  | 4.43258  |
| H | -0.36157 | -2.80580 | -3.89445 |
| H | -1.34584 | -4.26335 | -3.72725 |
| H | -0.03607 | -3.94857 | -2.58582 |
| H | -0.88991 | 5.74372  | 0.41548  |
| H | 0.50819  | 6.71768  | -0.06870 |
| H | 0.49863  | 5.87640  | 1.49008  |
| H | -4.79237 | 0.05698  | -0.56928 |
| H | -5.42143 | -0.61228 | -2.07582 |
| H | -4.18815 | 0.65134  | -2.11383 |
| H | 4.02465  | 2.48929  | -1.31928 |
| H | -2.76819 | 0.19390  | -3.82654 |
| H | -3.16851 | -1.30573 | -4.67158 |
| H | -1.47912 | -0.87985 | -4.36921 |
| H | -3.42025 | -2.73754 | 1.54295  |
| H | -4.78787 | -3.25137 | 0.55603  |
| H | -4.58380 | -1.54414 | 0.94758  |
| H | -0.85915 | 0.37622  | -1.22550 |
| H | -1.19416 | -2.06809 | 1.52779  |
| H | 0.16819  | -1.55038 | -0.36601 |

125

Radical intermediate - doublet

|    |          |          |          |
|----|----------|----------|----------|
| C  | 6.62521  | 6.69792  | 15.98269 |
| C  | 7.32425  | 7.60170  | 15.13893 |
| C  | 8.66143  | 7.73510  | 15.57412 |
| C  | 8.83824  | 6.83854  | 16.67841 |
| C  | 7.57767  | 6.18420  | 16.92310 |
| C  | 9.60044  | 8.85029  | 15.15032 |
| C  | 9.40491  | 10.07835 | 16.05751 |
| C  | 10.06691 | 6.93499  | 17.58016 |
| C  | 9.72883  | 7.64216  | 18.90752 |
| C  | 7.27779  | 5.30650  | 18.13262 |
| C  | 6.55944  | 6.06598  | 19.26605 |
| C  | 5.11916  | 6.79486  | 16.20179 |
| C  | 4.83920  | 8.08406  | 17.00548 |
| C  | 9.44528  | 9.27080  | 13.68895 |
| C  | 10.86440 | 5.66577  | 17.88338 |
| C  | 6.50142  | 4.02016  | 17.82922 |
| C  | 4.23855  | 6.83123  | 14.95197 |
| U  | 8.44879  | 5.20334  | 14.31802 |
| S  | 11.03887 | 6.11705  | 14.21198 |
| C  | 11.59749 | 4.54328  | 13.79668 |
| S  | 10.40436 | 3.29182  | 13.61304 |
| Ir | 9.50516  | 2.53798  | 15.68950 |
| C  | 10.50365 | 1.61271  | 17.49583 |
| C  | 11.24591 | 1.25477  | 16.32987 |
| C  | 10.38051 | 0.45006  | 15.48314 |
| C  | 9.10917  | 0.35157  | 16.11784 |
| C  | 9.16578  | 1.08630  | 17.36661 |
| C  | 12.69982 | 1.50927  | 16.08336 |
| C  | 10.82232 | -0.22864 | 14.22547 |
| C  | 7.94370  | -0.47191 | 15.66640 |
| C  | 8.14194  | 1.01382  | 18.45419 |
| C  | 11.06311 | 2.26764  | 18.71742 |
| C  | 6.41586  | 5.58788  | 12.50135 |
| C  | 7.50757  | 6.10730  | 11.75213 |
| C  | 8.34794  | 4.99731  | 11.41767 |
| C  | 7.68271  | 3.79520  | 11.87965 |

|   |          |          |          |
|---|----------|----------|----------|
| C | 6.48397  | 4.16939  | 12.54688 |
| C | 7.48552  | 7.49045  | 11.10499 |
| C | 7.25129  | 7.35016  | 9.58864  |
| C | 9.65330  | 4.98301  | 10.61885 |
| C | 9.52245  | 4.46984  | 9.16966  |
| C | 8.03570  | 2.40828  | 11.36084 |
| C | 7.95756  | 1.22385  | 12.33146 |
| C | 5.32450  | 3.25921  | 12.92884 |
| C | 4.02953  | 3.70542  | 12.23142 |
| C | 6.38311  | 8.41475  | 11.63071 |
| C | 5.09753  | 3.07086  | 14.43308 |
| C | 7.17086  | 2.09119  | 10.12194 |
| C | 10.44069 | 6.30030  | 10.60391 |
| H | 8.03849  | 2.92504  | 15.08655 |
| H | 9.48841  | 4.07054  | 16.21641 |
| H | 12.65838 | 4.30593  | 13.77291 |
| H | 6.85574  | 8.22326  | 14.39113 |
| H | 10.63434 | 8.50702  | 15.27597 |
| H | 8.38242  | 10.46323 | 15.97273 |
| H | 10.09294 | 10.88074 | 15.76754 |
| H | 9.58770  | 9.84456  | 17.10897 |
| H | 9.61200  | 8.42793  | 13.01427 |
| H | 10.17783 | 10.04581 | 13.44018 |
| H | 8.45148  | 9.68575  | 13.48974 |
| H | 10.75840 | 7.59232  | 17.04256 |
| H | 10.64893 | 7.97568  | 19.40099 |
| H | 9.21711  | 6.96604  | 19.59910 |
| H | 9.08742  | 8.51594  | 18.76008 |
| H | 10.27435 | 4.93745  | 18.44410 |
| H | 11.73483 | 5.92692  | 18.49814 |
| H | 11.21683 | 5.18587  | 16.96922 |
| H | 8.25045  | 4.99406  | 18.52651 |
| H | 6.60294  | 5.47995  | 20.19169 |
| H | 5.50153  | 6.22146  | 19.03466 |
| H | 7.00708  | 7.04244  | 19.46607 |
| H | 5.51934  | 4.22386  | 17.39385 |

|   |          |         |          |
|---|----------|---------|----------|
| H | 6.32837  | 3.46449 | 18.75781 |
| H | 7.06029  | 3.37919 | 17.14307 |
| H | 4.79306  | 5.94597 | 16.81128 |
| H | 3.79207  | 8.11858 | 17.32900 |
| H | 5.02623  | 8.96419 | 16.38041 |
| H | 5.47469  | 8.16745 | 17.88889 |
| H | 3.19739  | 7.01485 | 15.23893 |
| H | 4.26457  | 5.89427 | 14.39588 |
| H | 4.53363  | 7.64191 | 14.27693 |
| H | 5.57384  | 6.17570 | 12.83137 |
| H | 8.44502  | 7.99763 | 11.24809 |
| H | 8.04532  | 6.79428 | 9.09134  |
| H | 7.19281  | 8.33972 | 9.12058  |
| H | 6.30622  | 6.82965 | 9.39746  |
| H | 5.38966  | 8.00315 | 11.42098 |
| H | 6.44671  | 9.38498 | 11.12748 |
| H | 6.45112  | 8.59868 | 12.70203 |
| H | 5.55923  | 2.27012 | 12.52871 |
| H | 3.67699  | 4.67358 | 12.60190 |
| H | 3.22970  | 2.97659 | 12.40581 |
| H | 4.17635  | 3.79986 | 11.15107 |
| H | 5.97157  | 2.61966 | 14.91125 |
| H | 4.23773  | 2.41442 | 14.61277 |
| H | 4.89352  | 4.01989 | 14.93763 |
| H | 9.08063  | 2.45791 | 11.03599 |
| H | 8.45544  | 1.43737 | 13.27844 |
| H | 8.43944  | 0.35277 | 11.87217 |
| H | 6.92675  | 0.93401 | 12.55601 |
| H | 6.12797  | 1.91837 | 10.40815 |
| H | 7.53064  | 1.18172 | 9.62619  |
| H | 7.17770  | 2.90434 | 9.39255  |
| H | 10.29927 | 4.26055 | 11.13492 |
| H | 9.20795  | 3.42692 | 9.11893  |
| H | 10.49660 | 4.54036 | 8.67258  |
| H | 8.81123  | 5.05737 | 8.58179  |
| H | 9.98813  | 7.05160 | 9.95044  |

|   |          |          |          |
|---|----------|----------|----------|
| H | 11.44836 | 6.10977  | 10.21918 |
| H | 10.55012 | 6.71994  | 11.60605 |
| H | 6.99558  | 0.00262  | 15.93072 |
| H | 7.96680  | -1.45935 | 16.14510 |
| H | 7.94804  | -0.62485 | 14.58568 |
| H | 8.21739  | 1.86169  | 19.13813 |
| H | 8.27698  | 0.09758  | 19.04513 |
| H | 7.12547  | 1.00183  | 18.05412 |
| H | 10.29417 | 2.80264  | 19.27847 |
| H | 11.85617 | 2.97687  | 18.47331 |
| H | 11.48853 | 1.50490  | 19.38258 |
| H | 12.90837 | 1.60202  | 15.01487 |
| H | 13.31221 | 0.68517  | 16.47267 |
| H | 13.03211 | 2.43087  | 16.56686 |
| H | 9.98014  | -0.66794 | 13.68780 |
| H | 11.52824 | -1.03564 | 14.45789 |
| H | 11.32085 | 0.47089  | 13.54734 |

125

Radical intermediate - quartet

|   |          |          |          |
|---|----------|----------|----------|
| C | 6.61824  | 6.65513  | 15.96146 |
| C | 7.30125  | 7.58215  | 15.13559 |
| C | 8.63682  | 7.69713  | 15.55769 |
| C | 8.82213  | 6.78848  | 16.64213 |
| C | 7.57148  | 6.13585  | 16.88755 |
| C | 9.58583  | 8.78381  | 15.12046 |
| C | 9.40566  | 10.01816 | 16.01091 |
| C | 10.05345 | 6.86325  | 17.52387 |
| C | 9.71659  | 7.54624  | 18.85718 |
| C | 7.28162  | 5.24075  | 18.07416 |
| C | 6.57279  | 5.99200  | 19.21082 |
| C | 5.12069  | 6.73083  | 16.17893 |
| C | 4.84215  | 8.00090  | 17.00256 |
| C | 9.42010  | 9.15950  | 13.65438 |
| C | 10.83048 | 5.58229  | 17.79651 |
| C | 6.49405  | 3.97347  | 17.74854 |
| C | 4.26149  | 6.78743  | 14.92168 |



|    |          |          |          |
|----|----------|----------|----------|
| U  | 8.39373  | 5.20922  | 14.32012 |
| S  | 11.01791 | 6.07650  | 14.25140 |
| C  | 11.55633 | 4.53736  | 13.75675 |
| S  | 10.37822 | 3.28567  | 13.59400 |
| Ir | 9.45236  | 2.60845  | 15.67578 |
| C  | 10.47420 | 1.68969  | 17.45927 |
| C  | 11.19585 | 1.34162  | 16.28400 |
| C  | 10.32527 | 0.53212  | 15.45173 |
| C  | 9.06627  | 0.43452  | 16.09856 |
| C  | 9.13667  | 1.16962  | 17.34278 |
| C  | 12.62889 | 1.63794  | 16.00198 |
| C  | 10.75014 | -0.13645 | 14.19066 |
| C  | 7.88796  | -0.36184 | 15.65164 |
| C  | 8.12914  | 1.09510  | 18.43623 |
| C  | 11.05140 | 2.32701  | 18.67337 |
| C  | 6.40690  | 5.59886  | 12.48842 |
| C  | 7.51695  | 6.10930  | 11.77081 |
| C  | 8.36354  | 5.00475  | 11.47067 |
| C  | 7.69623  | 3.81014  | 11.92990 |
| C  | 6.48460  | 4.18650  | 12.55461 |
| C  | 7.52844  | 7.48878  | 11.14067 |
| C  | 7.33964  | 7.35526  | 9.62341  |
| C  | 9.67673  | 4.98680  | 10.70743 |
| C  | 9.56073  | 4.47142  | 9.26433  |
| C  | 8.06289  | 2.42637  | 11.44170 |
| C  | 7.97294  | 1.26779  | 12.43359 |
| C  | 5.35323  | 3.28269  | 12.99087 |
| C  | 4.03480  | 3.71696  | 12.34586 |
| C  | 6.41944  | 8.40386  | 11.65277 |
| C  | 5.22010  | 3.14386  | 14.50703 |
| C  | 7.20982  | 2.10111  | 10.20488 |
| C  | 10.45448 | 6.30308  | 10.71903 |
| H  | 7.99188  | 2.98276  | 15.06768 |
| H  | 9.42996  | 4.14198  | 16.18712 |
| H  | 12.59794 | 4.34104  | 13.51959 |
| H  | 6.83115  | 8.20701  | 14.39644 |

|   |          |          |          |
|---|----------|----------|----------|
| H | 10.61239 | 8.42793  | 15.25014 |
| H | 8.38630  | 10.40862 | 15.92739 |
| H | 10.09966 | 10.81210 | 15.71566 |
| H | 9.58829  | 9.78554  | 17.06188 |
| H | 9.55250  | 8.28484  | 13.01638 |
| H | 10.16632 | 9.90301  | 13.35996 |
| H | 8.43277  | 9.58559  | 13.45606 |
| H | 10.74303 | 7.52503  | 16.99300 |
| H | 10.63359 | 7.87909  | 19.35420 |
| H | 9.20913  | 6.85617  | 19.53580 |
| H | 9.06996  | 8.41583  | 18.71801 |
| H | 10.21950 | 4.84304  | 18.31409 |
| H | 11.69100 | 5.80977  | 18.43569 |
| H | 11.19247 | 5.13184  | 16.87381 |
| H | 8.25393  | 4.91698  | 18.45395 |
| H | 6.62870  | 5.40915  | 20.13655 |
| H | 5.51375  | 6.14056  | 18.98617 |
| H | 7.01635  | 6.97004  | 19.40227 |
| H | 5.52076  | 4.19599  | 17.30765 |
| H | 6.30677  | 3.40664  | 18.66483 |
| H | 7.05111  | 3.33943  | 17.05911 |
| H | 4.80051  | 5.86945  | 16.76949 |
| H | 3.80328  | 8.02162  | 17.34919 |
| H | 5.00968  | 8.88879  | 16.38484 |
| H | 5.49724  | 8.07832  | 17.87034 |
| H | 3.21684  | 6.97079  | 15.19118 |
| H | 4.29504  | 5.85899  | 14.35633 |
| H | 4.57358  | 7.60375  | 14.26356 |
| H | 5.56567  | 6.18953  | 12.80559 |
| H | 8.48580  | 7.98323  | 11.31649 |
| H | 8.14857  | 6.80077  | 9.15266  |
| H | 7.29602  | 8.34470  | 9.15582  |
| H | 6.40326  | 6.83265  | 9.40346  |
| H | 5.43299  | 8.00117  | 11.40370 |
| H | 6.50080  | 9.38632  | 11.17954 |
| H | 6.45843  | 8.55572  | 12.72839 |

|   |          |          |          |
|---|----------|----------|----------|
| H | 5.57239  | 2.28817  | 12.60164 |
| H | 3.70207  | 4.69313  | 12.70846 |
| H | 3.24128  | 2.99571  | 12.56769 |
| H | 4.13832  | 3.78850  | 11.25986 |
| H | 6.10830  | 2.67034  | 14.92851 |
| H | 4.35097  | 2.53406  | 14.77583 |
| H | 5.10137  | 4.11522  | 14.99229 |
| H | 9.10957  | 2.47625  | 11.13033 |
| H | 8.45607  | 1.50429  | 13.37944 |
| H | 8.46313  | 0.38809  | 12.00539 |
| H | 6.94092  | 0.98467  | 12.65110 |
| H | 6.16734  | 1.93034  | 10.48982 |
| H | 7.57275  | 1.19207  | 9.71309  |
| H | 7.21857  | 2.91333  | 9.47632  |
| H | 10.30930 | 4.26376  | 11.23366 |
| H | 9.26764  | 3.42281  | 9.22390  |
| H | 10.53244 | 4.55757  | 8.76701  |
| H | 8.83608  | 5.03910  | 8.67629  |
| H | 10.02952 | 7.04688  | 10.04152 |
| H | 11.48191 | 6.11890  | 10.39134 |
| H | 10.50725 | 6.72652  | 11.72201 |
| H | 6.95309  | 0.15388  | 15.87823 |
| H | 7.86804  | -1.33074 | 16.16390 |
| H | 7.91179  | -0.55067 | 14.57866 |
| H | 8.20401  | 1.94650  | 19.11309 |
| H | 8.28255  | 0.18432  | 19.02876 |
| H | 7.11147  | 1.06730  | 18.04433 |
| H | 10.29670 | 2.86531  | 19.24756 |
| H | 11.85254 | 3.02272  | 18.42464 |
| H | 11.47161 | 1.55081  | 19.32398 |
| H | 12.81825 | 1.66571  | 14.92793 |
| H | 13.28039 | 0.87091  | 16.43782 |
| H | 12.92125 | 2.60500  | 16.41456 |
| H | 9.91524  | -0.63911 | 13.70309 |
| H | 11.51595 | -0.88939 | 14.40614 |
| H | 11.17250 | 0.57954  | 13.48094 |

## Radical intermediate - sextet

|    |          |          |          |
|----|----------|----------|----------|
| C  | 6.66212  | 7.98244  | 18.30706 |
| C  | 7.16294  | 8.74245  | 17.21863 |
| C  | 8.44119  | 9.16114  | 17.52899 |
| C  | 8.77848  | 8.63758  | 18.88194 |
| C  | 7.69431  | 7.92056  | 19.34273 |
| C  | 9.33262  | 10.03182 | 16.68928 |
| C  | 9.30513  | 11.48779 | 17.19501 |
| C  | 10.12044 | 8.88162  | 19.53661 |
| C  | 10.02612 | 9.67106  | 20.85326 |
| C  | 7.58779  | 7.18815  | 20.66266 |
| C  | 6.50625  | 7.76654  | 21.59032 |
| C  | 5.28075  | 7.38574  | 18.33305 |
| C  | 4.20670  | 8.48735  | 18.31104 |
| C  | 8.98701  | 9.97715  | 15.19926 |
| C  | 10.94674 | 7.59473  | 19.70549 |
| C  | 7.43899  | 5.66629  | 20.49698 |
| C  | 5.07430  | 6.40259  | 17.16905 |
| U  | 8.83861  | 3.91503  | 12.44543 |
| S  | 11.07870 | 5.47547  | 12.38199 |
| C  | 11.43878 | 4.09616  | 13.35924 |
| S  | 11.08965 | 2.43056  | 12.87854 |
| Ir | 9.47615  | 1.72261  | 14.57118 |
| C  | 9.82846  | 1.30847  | 16.73627 |
| C  | 10.93453 | 0.76947  | 16.01811 |
| C  | 10.42565 | -0.24380 | 15.10237 |
| C  | 9.01140  | -0.33313 | 15.28411 |
| C  | 8.61510  | 0.65420  | 16.26975 |
| C  | 12.38134 | 1.09883  | 16.20911 |
| C  | 11.27616 | -1.11456 | 14.23153 |
| C  | 8.09803  | -1.32236 | 14.63101 |
| C  | 7.25537  | 0.79344  | 16.88046 |
| C  | 9.89253  | 2.31072  | 17.84626 |
| C  | 6.72833  | 4.77052  | 11.06904 |
| C  | 7.82333  | 5.14338  | 10.24025 |

|   |          |          |          |
|---|----------|----------|----------|
| C | 8.37964  | 3.93255  | 9.71489  |
| C | 7.59792  | 2.82726  | 10.22164 |
| C | 6.56989  | 3.35936  | 11.05962 |
| C | 8.17958  | 6.58804  | 9.93288  |
| C | 7.47140  | 7.06855  | 8.65519  |
| C | 9.46620  | 3.73842  | 8.66242  |
| C | 8.84866  | 3.56987  | 7.26146  |
| C | 7.73149  | 1.39277  | 9.72584  |
| C | 8.05347  | 0.33899  | 10.79379 |
| C | 5.41098  | 2.64498  | 11.73004 |
| C | 4.09235  | 2.93292  | 10.99324 |
| C | 7.85203  | 7.53909  | 11.09057 |
| C | 5.27067  | 3.01370  | 13.21439 |
| C | 6.50306  | 0.96090  | 8.90571  |
| C | 10.58122 | 4.78812  | 8.60070  |
| H | 8.33811  | 1.70954  | 13.41849 |
| H | 9.01620  | 3.27231  | 14.80535 |
| H | 11.77520 | 4.23471  | 14.38425 |
| H | 6.62341  | 8.95953  | 16.30564 |
| H | 10.36502 | 9.66766  | 16.80072 |
| H | 8.29775  | 11.90528 | 17.09401 |
| H | 9.99410  | 12.11046 | 16.61346 |
| H | 9.59076  | 11.56057 | 18.24867 |
| H | 9.01222  | 8.95079  | 14.82141 |
| H | 9.70099  | 10.57044 | 14.61889 |
| H | 7.98859  | 10.38599 | 15.00851 |
| H | 10.69251 | 9.51498  | 18.84753 |
| H | 11.02761 | 9.93184  | 21.21441 |
| H | 9.52993  | 9.09932  | 21.64312 |
| H | 9.46254  | 10.59896 | 20.71524 |
| H | 10.48072 | 6.89912  | 20.41012 |
| H | 11.94884 | 7.82872  | 20.08309 |
| H | 11.05830 | 7.07391  | 18.74935 |
| H | 8.54048  | 7.33967  | 21.18014 |
| H | 6.53142  | 7.27067  | 22.56773 |
| H | 5.49806  | 7.63760  | 21.18451 |

|   |         |          |          |
|---|---------|----------|----------|
| H | 6.66366 | 8.83781  | 21.74917 |
| H | 6.49553 | 5.38997  | 20.01597 |
| H | 7.46678 | 5.16804  | 21.47318 |
| H | 8.25299 | 5.26285  | 19.88640 |
| H | 5.15375 | 6.82438  | 19.26349 |
| H | 3.20423 | 8.04810  | 18.36619 |
| H | 4.26717 | 9.07634  | 17.39017 |
| H | 4.32567 | 9.17466  | 19.15408 |
| H | 4.07828 | 5.94884  | 17.22125 |
| H | 5.81793 | 5.59978  | 17.19170 |
| H | 5.16106 | 6.91198  | 16.20365 |
| H | 6.07724 | 5.46508  | 11.59026 |
| H | 9.25832 | 6.65610  | 9.76611  |
| H | 7.74029 | 6.45601  | 7.79030  |
| H | 7.73621 | 8.10795  | 8.42856  |
| H | 6.38346 | 7.01354  | 8.77463  |
| H | 6.77490 | 7.58974  | 11.28550 |
| H | 8.18679 | 8.55449  | 10.85375 |
| H | 8.35661 | 7.23868  | 12.01700 |
| H | 5.59455 | 1.56608  | 11.67857 |
| H | 3.84408 | 3.99846  | 11.04914 |
| H | 3.26283 | 2.37041  | 11.43776 |
| H | 4.15875 | 2.66568  | 9.93491  |
| H | 6.16724 | 2.74272  | 13.78682 |
| H | 4.42434 | 2.48706  | 13.67044 |
| H | 5.08728 | 4.08730  | 13.34165 |
| H | 8.58039 | 1.38255  | 9.03388  |
| H | 8.98553 | 0.57128  | 11.31689 |
| H | 8.16136 | -0.64747 | 10.32617 |
| H | 7.26489 | 0.26258  | 11.54894 |
| H | 5.62326 | 0.81997  | 9.54127  |
| H | 6.69630 | 0.00861  | 8.39831  |
| H | 6.24721 | 1.70520  | 8.14551  |
| H | 9.96670 | 2.79170  | 8.90650  |
| H | 8.11662 | 2.75867  | 7.22762  |
| H | 9.62785 | 3.35268  | 6.52155  |

|   |          |          |          |
|---|----------|----------|----------|
| H | 8.33844  | 4.48677  | 6.94854  |
| H | 10.23344 | 5.73106  | 8.16706  |
| H | 11.38581 | 4.42057  | 7.95394  |
| H | 11.00820 | 4.99180  | 9.58634  |
| H | 7.08958  | -0.91892 | 14.51594 |
| H | 8.02714  | -2.23369 | 15.23827 |
| H | 8.45773  | -1.60658 | 13.63991 |
| H | 7.08346  | 1.81152  | 17.23768 |
| H | 7.13671  | 0.11427  | 17.73523 |
| H | 6.46892  | 0.56108  | 16.15849 |
| H | 8.99799  | 2.93673  | 17.86976 |
| H | 10.75647 | 2.97087  | 17.74415 |
| H | 9.97094  | 1.80139  | 18.81510 |
| H | 12.90500 | 1.15864  | 15.25122 |
| H | 12.87751 | 0.32960  | 16.81479 |
| H | 12.50978 | 2.05611  | 16.71909 |
| H | 10.69857 | -1.54545 | 13.41053 |
| H | 11.70508 | -1.94230 | 14.81092 |
| H | 12.10391 | -0.54994 | 13.79447 |

250

Coupling adduct - quintet

|   |          |          |          |
|---|----------|----------|----------|
| C | 19.88154 | 6.78079  | 10.59366 |
| C | 19.20253 | 7.67498  | 11.46447 |
| C | 17.89002 | 7.90474  | 10.99389 |
| C | 17.70477 | 7.07922  | 9.83690  |
| C | 18.93727 | 6.37169  | 9.59642  |
| C | 16.99273 | 9.04475  | 11.44187 |
| C | 17.11980 | 9.39260  | 12.92453 |
| C | 16.51464 | 7.28721  | 8.90281  |
| C | 15.64268 | 6.08536  | 8.53391  |
| C | 19.22930 | 5.54130  | 8.35204  |
| C | 19.92257 | 4.19908  | 8.61395  |
| C | 21.39762 | 6.80853  | 10.42737 |
| C | 22.23466 | 6.73984  | 11.70583 |
| C | 17.27827 | 10.30046 | 10.59856 |
| C | 16.93570 | 8.01908  | 7.61352  |

|    |          |          |          |
|----|----------|----------|----------|
| C  | 20.02659 | 6.31191  | 7.28084  |
| C  | 21.77286 | 8.11670  | 9.69751  |
| U  | 17.93090 | 5.30713  | 12.12513 |
| S  | 15.87726 | 3.44828  | 12.66430 |
| Ir | 16.77082 | 2.80722  | 10.54510 |
| C  | 17.32450 | 1.04411  | 9.28181  |
| C  | 16.56550 | 1.96469  | 8.48042  |
| C  | 15.24170 | 2.07408  | 9.06009  |
| C  | 15.20266 | 1.20980  | 10.20265 |
| C  | 16.48019 | 0.56262  | 10.34698 |
| C  | 16.98348 | 2.51954  | 7.15602  |
| C  | 14.07379 | 2.79698  | 8.46577  |
| C  | 14.00235 | 0.95454  | 11.05768 |
| C  | 16.79729 | -0.56111 | 11.28167 |
| C  | 18.69870 | 0.53742  | 8.97275  |
| S  | 15.38990 | 6.33562  | 12.22386 |
| C  | 14.74934 | 4.76629  | 12.52390 |
| C  | 19.92094 | 5.51981  | 14.02245 |
| C  | 18.82571 | 6.04334  | 14.76278 |
| C  | 17.93319 | 4.95241  | 15.01524 |
| C  | 18.56774 | 3.74964  | 14.51478 |
| C  | 19.80103 | 4.10866  | 13.90427 |
| C  | 18.88012 | 7.38768  | 15.48542 |
| C  | 20.02849 | 8.29839  | 15.04060 |
| C  | 16.60461 | 4.94889  | 15.77577 |
| C  | 15.86935 | 6.29419  | 15.84728 |
| C  | 18.13793 | 2.35191  | 14.93536 |
| C  | 18.94493 | 1.91726  | 16.17762 |
| C  | 20.93294 | 3.16816  | 13.51255 |
| C  | 21.18431 | 3.02238  | 12.00732 |
| C  | 19.06846 | 7.15379  | 16.99657 |
| C  | 16.67450 | 4.34911  | 17.19568 |
| C  | 18.19469 | 1.22887  | 13.89337 |
| C  | 22.22962 | 3.53405  | 14.25212 |
| C  | 9.12136  | 4.68919  | 13.77761 |
| S  | 8.27163  | 3.17658  | 13.61286 |



|    |          |          |          |
|----|----------|----------|----------|
| Ir | 7.93926  | 2.41043  | 15.82935 |
| C  | 7.82581  | 0.99405  | 17.52471 |
| C  | 9.13216  | 1.61154  | 17.54539 |
| C  | 9.81796  | 1.26862  | 16.33688 |
| C  | 8.94032  | 0.39586  | 15.57294 |
| C  | 7.73449  | 0.20831  | 16.30622 |
| C  | 9.71900  | 2.37104  | 18.69249 |
| C  | 11.23808 | 1.59561  | 15.99523 |
| C  | 9.31372  | -0.26057 | 14.28090 |
| C  | 6.62032  | -0.73655 | 15.98388 |
| C  | 6.86094  | 0.90732  | 18.66515 |
| S  | 8.59860  | 6.03985  | 12.89502 |
| U  | 6.58570  | 5.12738  | 14.59227 |
| C  | 3.91678  | 5.20040  | 13.90640 |
| C  | 4.46379  | 5.78109  | 12.73218 |
| C  | 5.17980  | 4.73923  | 12.05166 |
| C  | 4.96879  | 3.50883  | 12.78438 |
| C  | 4.18675  | 3.80787  | 13.94012 |
| C  | 3.96444  | 7.09906  | 12.14926 |
| C  | 3.18733  | 7.97297  | 13.13795 |
| C  | 5.96626  | 4.81615  | 10.73650 |
| C  | 6.37857  | 6.22071  | 10.27448 |
| C  | 5.22545  | 2.14556  | 12.15163 |
| C  | 3.96634  | 1.68311  | 11.38573 |
| C  | 3.47497  | 2.85368  | 14.88421 |
| C  | 3.51705  | 3.29369  | 16.35112 |
| C  | 3.01554  | 6.80841  | 10.97002 |
| C  | 5.29628  | 4.12819  | 9.52713  |
| C  | 5.67716  | 0.97810  | 13.03452 |
| C  | 2.00607  | 2.67743  | 14.45783 |
| C  | 5.88212  | 7.58205  | 15.72115 |
| C  | 5.77738  | 6.74251  | 16.85920 |
| C  | 7.11686  | 6.34646  | 17.20653 |
| C  | 8.02428  | 6.97955  | 16.27929 |
| C  | 7.23844  | 7.77565  | 15.37800 |
| C  | 4.51186  | 6.68678  | 17.71431 |

|   |          |          |          |
|---|----------|----------|----------|
| C | 3.25324  | 7.19471  | 17.00278 |
| C | 7.71533  | 8.92406  | 14.50765 |
| C | 6.95751  | 9.09087  | 13.18955 |
| C | 9.55458  | 7.02879  | 16.25413 |
| C | 10.32558 | 5.84498  | 16.85709 |
| C | 7.56935  | 5.57585  | 18.44297 |
| C | 6.54542  | 4.61201  | 19.04944 |
| C | 7.58519  | 10.24501 | 15.29554 |
| C | 10.13076 | 8.32704  | 16.85414 |
| C | 8.13170  | 6.49710  | 19.54176 |
| C | 4.66979  | 7.55343  | 18.97850 |
| H | 18.23397 | 3.06115  | 11.22270 |
| H | 16.86278 | 4.38378  | 10.17717 |
| H | 13.67853 | 4.57832  | 12.49014 |
| H | 19.67771 | 8.22175  | 12.26461 |
| H | 15.94798 | 8.75924  | 11.26965 |
| H | 18.31442 | 10.62970 | 10.73541 |
| H | 16.61952 | 11.12225 | 10.90173 |
| H | 17.12219 | 10.12236 | 9.53192  |
| H | 16.88744 | 8.53172  | 13.55536 |
| H | 16.41935 | 10.19316 | 13.18449 |
| H | 18.12595 | 9.74676  | 13.17280 |
| H | 15.84879 | 7.96758  | 9.44411  |
| H | 16.05199 | 8.42169  | 7.10543  |
| H | 17.43089 | 7.34018  | 6.91284  |
| H | 17.61937 | 8.84980  | 7.81206  |
| H | 16.20431 | 5.32612  | 7.98302  |
| H | 14.81977 | 6.42302  | 7.89206  |
| H | 15.21920 | 5.61490  | 9.42210  |
| H | 18.25473 | 5.30435  | 7.91339  |
| H | 19.98329 | 5.77313  | 6.32689  |
| H | 21.08264 | 6.39832  | 7.55285  |
| H | 19.63864 | 7.31949  | 7.11412  |
| H | 20.89678 | 4.32254  | 9.09449  |
| H | 20.10422 | 3.68267  | 7.66302  |
| H | 19.30380 | 3.55856  | 9.24677  |

|   |          |         |          |
|---|----------|---------|----------|
| H | 21.70183 | 5.97265 | 9.78902  |
| H | 22.83236 | 8.11146 | 9.41533  |
| H | 21.60537 | 8.97562 | 10.35655 |
| H | 21.17795 | 8.27303 | 8.79607  |
| H | 23.29403 | 6.87673 | 11.46244 |
| H | 22.13720 | 5.78280 | 12.21751 |
| H | 21.96080 | 7.53538 | 12.40744 |
| H | 20.79267 | 6.09188 | 13.74684 |
| H | 17.94319 | 7.93635 | 15.34733 |
| H | 18.24545 | 6.59370 | 17.43903 |
| H | 19.14266 | 8.11233 | 17.52321 |
| H | 19.99231 | 6.59423 | 17.18105 |
| H | 21.00086 | 7.84057 | 15.25347 |
| H | 19.98457 | 9.24187 | 15.59434 |
| H | 19.99674 | 8.54277 | 13.97981 |
| H | 20.64977 | 2.17581 | 13.87153 |
| H | 22.62816 | 4.50057 | 13.92744 |
| H | 23.00327 | 2.78074 | 14.06420 |
| H | 22.06420 | 3.59189 | 15.33233 |
| H | 20.29821 | 2.63869 | 11.49336 |
| H | 22.01002 | 2.32510 | 11.82147 |
| H | 21.45406 | 3.97613 | 11.54418 |
| H | 17.08538 | 2.42970 | 15.22926 |
| H | 17.73052 | 1.51905 | 12.94955 |
| H | 17.66760 | 0.35078 | 14.28386 |
| H | 19.21874 | 0.91043 | 13.67520 |
| H | 19.98724 | 1.71055 | 15.91279 |
| H | 18.52692 | 0.99771 | 16.60466 |
| H | 18.95342 | 2.68317 | 16.95659 |
| H | 15.94550 | 4.28399 | 15.20169 |
| H | 16.94738 | 3.29331 | 17.19373 |
| H | 15.69046 | 4.43043 | 17.67165 |
| H | 17.39113 | 4.87338 | 17.83473 |
| H | 16.33279 | 6.98903 | 16.55358 |
| H | 14.84534 | 6.12271 | 16.19662 |
| H | 15.80117 | 6.77386 | 14.86883 |

|   |          |          |          |
|---|----------|----------|----------|
| H | 17.86142 | -0.59629 | 11.52633 |
| H | 16.52851 | -1.52559 | 10.83001 |
| H | 16.24739 | -0.47159 | 12.22105 |
| H | 19.28908 | 1.27854  | 8.43043  |
| H | 18.64044 | -0.36526 | 8.35090  |
| H | 19.24312 | 0.27860  | 9.88404  |
| H | 18.05675 | 2.71310  | 7.11756  |
| H | 16.46355 | 3.45179  | 6.92560  |
| H | 16.74407 | 1.80559  | 6.35660  |
| H | 13.37960 | 3.14052  | 9.23638  |
| H | 13.51758 | 2.13958  | 7.78431  |
| H | 14.38993 | 3.67331  | 7.89715  |
| H | 14.28628 | 0.71234  | 12.08423 |
| H | 13.42512 | 0.11238  | 10.65560 |
| H | 13.34429 | 1.82585  | 11.09239 |
| H | 6.37450  | 2.76786  | 15.57271 |
| H | 7.96477  | 3.95040  | 16.30222 |
| H | 10.00071 | 4.72066  | 14.41501 |
| H | 5.05781  | 8.12228  | 15.28129 |
| H | 8.77163  | 8.76063  | 14.26387 |
| H | 6.52768  | 10.49920 | 15.43014 |
| H | 8.06080  | 11.06998 | 14.75228 |
| H | 8.03208  | 10.18631 | 16.29051 |
| H | 7.02374  | 8.19777  | 12.56643 |
| H | 7.36849  | 9.93036  | 12.61812 |
| H | 5.89812  | 9.30460  | 13.36560 |
| H | 9.81697  | 7.04923  | 15.18773 |
| H | 11.22608 | 8.29255  | 16.82611 |
| H | 9.82994  | 8.46382  | 17.89774 |
| H | 9.81981  | 9.21353  | 16.30057 |
| H | 10.35343 | 5.88423  | 17.95049 |
| H | 11.36585 | 5.88853  | 16.51366 |
| H | 9.90821  | 4.87986  | 16.55854 |
| H | 8.39990  | 4.94245  | 18.12287 |
| H | 8.52962  | 5.89632  | 20.36875 |
| H | 7.36932  | 7.16219  | 19.95596 |

|   |         |         |          |
|---|---------|---------|----------|
| H | 8.94111 | 7.12756 | 19.16942 |
| H | 5.70199 | 5.12040 | 19.52043 |
| H | 7.02937 | 4.02371 | 19.83800 |
| H | 6.16370 | 3.91633 | 18.29744 |
| H | 4.31435 | 5.65682 | 18.03038 |
| H | 3.73992 | 7.55300 | 19.55946 |
| H | 4.89205 | 8.58921 | 18.69900 |
| H | 5.46867 | 7.20923 | 19.63475 |
| H | 2.38478 | 7.07040 | 17.65807 |
| H | 3.04442 | 6.66797 | 16.07291 |
| H | 3.33274 | 8.26223 | 16.77025 |
| H | 3.25028 | 5.70615 | 14.58792 |
| H | 4.80197 | 7.69178 | 11.76937 |
| H | 3.49465 | 6.23025 | 10.17906 |
| H | 2.65132 | 7.74451 | 10.53029 |
| H | 2.14678 | 6.23824 | 11.31796 |
| H | 2.27423 | 7.47140 | 13.47742 |
| H | 2.88269 | 8.90317 | 12.64697 |
| H | 3.76812 | 8.24056 | 14.02016 |
| H | 3.96684 | 1.87909 | 14.82497 |
| H | 1.46057 | 3.62106 | 14.56957 |
| H | 1.50709 | 1.92575 | 15.08095 |
| H | 1.91633 | 2.36915 | 13.41331 |
| H | 4.54518 | 3.37447 | 16.71819 |
| H | 2.99549 | 2.56664 | 16.98447 |
| H | 3.02299 | 4.25997 | 16.49370 |
| H | 6.02813 | 2.29820 | 11.42131 |
| H | 6.48095 | 1.25181 | 13.71814 |
| H | 6.02600 | 0.15942 | 12.39317 |
| H | 4.85403 | 0.57826 | 13.63461 |
| H | 3.20957 | 1.32161 | 12.08885 |
| H | 4.20793 | 0.85172 | 10.71219 |
| H | 3.51304 | 2.48268 | 10.79648 |
| H | 6.90438 | 4.27511 | 10.92562 |
| H | 5.21486 | 3.04710 | 9.63445  |
| H | 5.89312 | 4.31992 | 8.62816  |

|   |          |          |          |
|---|----------|----------|----------|
| H | 4.29108  | 4.52046  | 9.34119  |
| H | 5.54457  | 6.77016  | 9.82866  |
| H | 7.15028  | 6.13009  | 9.50270  |
| H | 6.79761  | 6.82222  | 11.07951 |
| H | 5.64872  | -0.32041 | 16.26079 |
| H | 6.74964  | -1.67591 | 16.53720 |
| H | 6.58708  | -0.98028 | 14.92070 |
| H | 6.95503  | 1.75880  | 19.34023 |
| H | 7.03982  | -0.00472 | 19.25031 |
| H | 5.82683  | 0.87786  | 18.31300 |
| H | 8.94465  | 2.85165  | 19.29281 |
| H | 10.41109 | 3.14508  | 18.35398 |
| H | 10.27463 | 1.68827  | 19.34796 |
| H | 11.38201 | 1.68331  | 14.91557 |
| H | 11.91815 | 0.81214  | 16.35582 |
| H | 11.55242 | 2.53884  | 16.44826 |
| H | 8.43477  | -0.61962 | 13.74188 |
| H | 9.96966  | -1.12051 | 14.46553 |
| H | 9.84598  | 0.43097  | 13.62201 |

250

Coupling TS - quintet

|   |           |           |           |
|---|-----------|-----------|-----------|
| C | 6.759558  | 6.776926  | 16.003524 |
| C | 7.415019  | 7.669057  | 15.117458 |
| C | 8.777433  | 7.790797  | 15.470392 |
| C | 9.012629  | 6.893906  | 16.567871 |
| C | 7.761938  | 6.264241  | 16.893583 |
| C | 9.672580  | 8.923442  | 14.999400 |
| C | 9.528705  | 10.140811 | 15.930122 |
| C | 10.297438 | 6.969603  | 17.389176 |
| C | 10.077399 | 7.701366  | 18.727791 |
| C | 7.515518  | 5.410538  | 18.130944 |
| C | 6.869970  | 6.200871  | 19.286694 |
| C | 5.268737  | 6.884193  | 16.310774 |
| C | 5.034193  | 8.204511  | 17.076789 |
| C | 9.395507  | 9.362102  | 13.559917 |
| C | 11.067585 | 5.674591  | 17.664543 |

|    |           |           |           |
|----|-----------|-----------|-----------|
| C  | 6.707343  | 4.131708  | 17.886547 |
| C  | 4.305519  | 6.858299  | 15.122319 |
| U  | 8.529682  | 5.253052  | 14.223342 |
| S  | 11.022676 | 6.274780  | 13.696193 |
| C  | 11.487714 | 4.685616  | 14.071882 |
| S  | 10.488518 | 3.336368  | 13.588593 |
| Ir | 9.557784  | 2.444851  | 15.602586 |
| C  | 10.498354 | 1.490077  | 17.401512 |
| C  | 11.236100 | 1.079859  | 16.252344 |
| C  | 10.341405 | 0.315629  | 15.395622 |
| C  | 9.060996  | 0.281219  | 16.011849 |
| C  | 9.131385  | 1.032763  | 17.252643 |
| C  | 12.703744 | 1.249039  | 16.016337 |
| C  | 10.767080 | -0.385075 | 14.143329 |
| C  | 7.865628  | -0.488475 | 15.544405 |
| C  | 8.093373  | 1.012925  | 18.329319 |
| C  | 11.062508 | 2.149651  | 18.619587 |
| C  | 13.763662 | 4.566401  | 12.246063 |
| S  | 14.344846 | 6.196303  | 12.226312 |
| U  | 16.890082 | 5.240329  | 11.971563 |
| Ir | 15.952001 | 2.526188  | 10.571033 |
| C  | 15.593492 | 1.582192  | 8.555380  |
| C  | 14.402290 | 1.433554  | 9.351641  |
| C  | 14.742970 | 0.611883  | 10.492444 |
| C  | 16.130166 | 0.267848  | 10.413442 |
| C  | 16.667013 | 0.891134  | 9.217608  |
| C  | 13.027800 | 1.882090  | 8.963903  |
| C  | 13.782834 | 0.145217  | 11.538932 |
| C  | 16.872147 | -0.720240 | 11.257416 |
| C  | 18.036432 | 0.621449  | 8.676773  |
| C  | 15.645702 | 2.185159  | 7.171365  |
| S  | 14.943114 | 3.316777  | 12.590861 |
| C  | 6.322098  | 5.497464  | 12.571233 |
| C  | 7.315779  | 6.095840  | 11.755072 |
| C  | 8.207252  | 5.046878  | 11.345628 |
| C  | 7.665672  | 3.800809  | 11.839402 |

|   |           |          |           |
|---|-----------|----------|-----------|
| C | 6.495310  | 4.087742 | 12.599933 |
| C | 7.148886  | 7.473475 | 11.118100 |
| C | 6.795976  | 7.314290 | 9.626118  |
| C | 9.454288  | 5.135846 | 10.458098 |
| C | 9.282920  | 4.570915 | 9.031539  |
| C | 8.071925  | 2.447523 | 11.270106 |
| C | 8.126603  | 1.234463 | 12.207730 |
| C | 5.413124  | 3.113243 | 13.044950 |
| C | 4.086954  | 3.430484 | 12.333121 |
| C | 6.034371  | 8.323470 | 11.735520 |
| C | 5.193051  | 3.027049 | 14.559585 |
| C | 7.151522  | 2.093131 | 10.082711 |
| C | 10.096409 | 6.524102 | 10.327789 |
| C | 18.945296 | 5.599338 | 13.734271 |
| C | 17.892065 | 6.153006 | 14.515073 |
| C | 17.024144 | 5.070651 | 14.867374 |
| C | 17.639600 | 3.847230 | 14.393030 |
| C | 18.832383 | 4.182887 | 13.694063 |
| C | 17.983102 | 7.522499 | 15.187659 |
| C | 18.302883 | 7.334750 | 16.683396 |
| C | 15.730827 | 5.106647 | 15.686702 |
| C | 15.854153 | 4.558853 | 17.124115 |
| C | 17.256138 | 2.479946 | 14.943914 |
| C | 17.285833 | 1.264413 | 14.011498 |
| C | 19.960802 | 3.243954 | 13.289011 |
| C | 21.250356 | 3.603820 | 14.045843 |
| C | 19.070099 | 8.434539 | 14.614678 |
| C | 20.234048 | 3.140143 | 11.783517 |
| C | 18.132293 | 2.170223 | 16.176595 |
| C | 15.023130 | 6.466729 | 15.755078 |
| C | 17.990025 | 7.649555 | 11.172531 |
| C | 16.642565 | 7.788680 | 10.769078 |
| C | 16.432790 | 6.870543 | 9.686025  |
| C | 17.684149 | 6.209569 | 9.418947  |
| C | 18.661033 | 6.725921 | 10.329330 |
| C | 15.727854 | 8.921860 | 11.197651 |



|   |           |           |           |
|---|-----------|-----------|-----------|
| C | 15.903872 | 10.130512 | 10.261173 |
| C | 15.177256 | 6.935133  | 8.819687  |
| C | 15.451487 | 7.645144  | 7.479003  |
| C | 17.947495 | 5.328143  | 8.205575  |
| C | 18.613900 | 6.091727  | 7.043916  |
| C | 20.164827 | 6.804927  | 10.088611 |
| C | 20.448731 | 8.077217  | 9.259399  |
| C | 15.935942 | 9.374382  | 12.643209 |
| C | 14.400822 | 5.645078  | 8.545429  |
| C | 18.746285 | 4.051912  | 8.486516  |
| C | 21.057567 | 6.857828  | 11.330493 |
| H | 17.355879 | 2.922275  | 11.293303 |
| H | 15.997885 | 4.047908  | 10.047002 |
| H | 12.895449 | 4.307446  | 11.643856 |
| H | 18.490740 | 8.294595  | 11.877478 |
| H | 14.688332 | 8.584096  | 11.114353 |
| H | 16.931149 | 10.509620 | 10.306217 |
| H | 15.230880 | 10.943172 | 10.557465 |
| H | 15.685785 | 9.878650  | 9.221112  |
| H | 15.805522 | 8.548677  | 13.346539 |
| H | 15.207359 | 10.149185 | 12.903336 |
| H | 16.933207 | 9.801703  | 12.793377 |
| H | 14.485347 | 7.570924  | 9.381330  |
| H | 14.507428 | 7.961426  | 7.020826  |
| H | 15.947358 | 6.974552  | 6.770006  |
| H | 16.083920 | 8.529541  | 7.596723  |
| H | 14.981365 | 4.947483  | 7.929454  |
| H | 13.489156 | 5.892177  | 7.987152  |
| H | 14.109898 | 5.135585  | 9.454677  |
| H | 16.964184 | 5.005416  | 7.848616  |
| H | 18.535723 | 5.506254  | 6.120216  |
| H | 19.679233 | 6.254340  | 7.232187  |
| H | 18.151211 | 7.065339  | 6.864906  |
| H | 19.757337 | 4.265536  | 8.843800  |
| H | 18.855325 | 3.472559  | 7.561645  |
| H | 18.239701 | 3.430302  | 9.228627  |

|   |           |          |           |
|---|-----------|----------|-----------|
| H | 20.478517 | 5.942627 | 9.492078  |
| H | 21.487049 | 8.086013 | 8.907145  |
| H | 20.297153 | 8.969918 | 9.876262  |
| H | 19.790773 | 8.161934 | 8.392822  |
| H | 22.094506 | 7.047490 | 11.032414 |
| H | 21.046562 | 5.925411 | 11.896279 |
| H | 20.761617 | 7.671212 | 12.001610 |
| H | 19.794477 | 6.160534 | 13.376264 |
| H | 17.028546 | 8.052251 | 15.115285 |
| H | 17.532282 | 6.769351 | 17.207394 |
| H | 18.397818 | 8.308862 | 17.177069 |
| H | 19.251625 | 6.800172 | 16.804869 |
| H | 20.060876 | 7.977020 | 14.705563 |
| H | 19.094009 | 9.376478 | 15.172426 |
| H | 18.901455 | 8.682549 | 13.568982 |
| H | 19.672915 | 2.242589 | 13.617848 |
| H | 21.647189 | 4.572412 | 13.723795 |
| H | 22.026788 | 2.852037 | 13.863091 |
| H | 21.076089 | 3.660656 | 15.124574 |
| H | 19.359184 | 2.754237 | 11.253077 |
| H | 21.074709 | 2.461834 | 11.594605 |
| H | 20.492328 | 4.107520 | 11.343172 |
| H | 16.217899 | 2.569901 | 15.280908 |
| H | 16.806217 | 1.464397 | 13.052931 |
| H | 16.764339 | 0.429607 | 14.494763 |
| H | 18.304483 | 0.920408 | 13.807549 |
| H | 19.163711 | 1.961105 | 15.873331 |
| H | 17.757960 | 1.282847 | 16.701145 |
| H | 18.161648 | 3.000675 | 16.885538 |
| H | 15.038794 | 4.434087 | 15.159610 |
| H | 16.099860 | 3.497076 | 17.157146 |
| H | 14.898089 | 4.691009 | 17.643529 |
| H | 16.614765 | 5.090287 | 17.703894 |
| H | 15.523329 | 7.161585 | 16.436125 |
| H | 14.006963 | 6.323561 | 16.137172 |
| H | 14.930098 | 6.929587 | 14.771727 |

|   |           |           |           |
|---|-----------|-----------|-----------|
| H | 17.860352 | -0.352792 | 11.545139 |
| H | 17.016015 | -1.655704 | 10.700852 |
| H | 16.328637 | -0.963045 | 12.172323 |
| H | 18.276734 | 1.270183  | 7.833334  |
| H | 18.103719 | -0.417175 | 8.327359  |
| H | 18.807042 | 0.763434  | 9.438643  |
| H | 16.623062 | 2.546263  | 6.825729  |
| H | 14.956756 | 3.027490  | 7.080844  |
| H | 15.326822 | 1.419504  | 6.451955  |
| H | 12.393872 | 2.030797  | 9.841463  |
| H | 12.533804 | 1.140923  | 8.321106  |
| H | 13.056434 | 2.829227  | 8.420264  |
| H | 14.290268 | -0.054396 | 12.485043 |
| H | 13.287219 | -0.778340 | 11.214749 |
| H | 13.010997 | 0.892201  | 11.734819 |
| H | 8.130441  | 2.870373  | 14.954313 |
| H | 9.472999  | 3.942883  | 16.194230 |
| H | 12.254062 | 4.514009  | 14.825430 |
| H | 6.917607  | 8.288347  | 14.387021 |
| H | 10.717080 | 8.593594  | 15.042749 |
| H | 8.497469  | 10.511426 | 15.925786 |
| H | 10.182630 | 10.956138 | 15.599112 |
| H | 9.792090  | 9.898683  | 16.962163 |
| H | 9.498161  | 8.532729  | 12.855655 |
| H | 10.099374 | 10.145319 | 13.259130 |
| H | 8.385431  | 9.772476  | 13.452787 |
| H | 10.974862 | 7.595521  | 16.796667 |
| H | 11.039424 | 8.001668  | 19.159772 |
| H | 9.583510  | 7.051686  | 19.457088 |
| H | 9.462186  | 8.597963  | 18.612474 |
| H | 10.504353 | 4.992893  | 18.306780 |
| H | 12.005476 | 5.911399  | 18.182205 |
| H | 11.305074 | 5.136516  | 16.746390 |
| H | 8.502071  | 5.090258  | 18.481994 |
| H | 6.943310  | 5.627639  | 20.218743 |
| H | 5.806749  | 6.381183  | 19.103088 |

|   |           |          |           |
|---|-----------|----------|-----------|
| H | 7.350964  | 7.168916 | 19.447638 |
| H | 5.705825  | 4.343621 | 17.502803 |
| H | 6.578812  | 3.585861 | 18.828365 |
| H | 7.218104  | 3.477734 | 17.175913 |
| H | 4.985142  | 6.064191 | 16.977631 |
| H | 4.011663  | 8.249912 | 17.470929 |
| H | 5.173674  | 9.059523 | 16.406126 |
| H | 5.729848  | 8.323799 | 17.909846 |
| H | 3.288357  | 7.078201 | 15.465587 |
| H | 4.278754  | 5.887425 | 14.625637 |
| H | 4.566254  | 7.617956 | 14.378375 |
| H | 5.470112  | 6.022557 | 12.973927 |
| H | 8.080336  | 8.045365 | 11.184138 |
| H | 7.549922  | 6.755698 | 9.071999  |
| H | 6.688143  | 8.296748 | 9.151082  |
| H | 5.843925  | 6.781877 | 9.520515  |
| H | 5.058715  | 7.840407 | 11.612735 |
| H | 5.984329  | 9.292932 | 11.228662 |
| H | 6.180863  | 8.514895 | 12.797498 |
| H | 5.716297  | 2.116536 | 12.714738 |
| H | 3.675463  | 4.389717 | 12.665074 |
| H | 3.338547  | 2.658174 | 12.546507 |
| H | 4.222099  | 3.487516 | 11.248710 |
| H | 6.064836  | 2.602962 | 15.064585 |
| H | 4.329303  | 2.391146 | 14.789457 |
| H | 4.998030  | 4.012965 | 14.992024 |
| H | 9.089031  | 2.571809 | 10.881359 |
| H | 8.612733  | 1.462055 | 13.157565 |
| H | 8.678597  | 0.423403 | 11.718086 |
| H | 7.128879  | 0.844456 | 12.433617 |
| H | 6.143273  | 1.855867 | 10.438207 |
| H | 7.528091  | 1.211160 | 9.549808  |
| H | 7.060499  | 2.913951 | 9.368002  |
| H | 10.205971 | 4.501615 | 10.950184 |
| H | 9.056232  | 3.504929 | 9.017475  |
| H | 10.213276 | 4.715680 | 8.469931  |

|   |           |           |           |
|---|-----------|-----------|-----------|
| H | 8.487387  | 5.083598  | 8.481579  |
| H | 9.531592  | 7.180535  | 9.659978  |
| H | 11.098569 | 6.417215  | 9.899241  |
| H | 10.213879 | 7.018237  | 11.292039 |
| H | 6.939171  | -0.038986 | 15.909033 |
| H | 7.905354  | -1.518995 | 15.920314 |
| H | 7.808442  | -0.529669 | 14.455130 |
| H | 8.249439  | 1.817194  | 19.050670 |
| H | 8.132431  | 0.062001  | 18.877815 |
| H | 7.083954  | 1.123781  | 17.926881 |
| H | 10.319254 | 2.774808  | 19.118630 |
| H | 11.920263 | 2.780723  | 18.378299 |
| H | 11.395376 | 1.389907  | 19.338613 |
| H | 12.923820 | 1.431942  | 14.961419 |
| H | 13.249047 | 0.345286  | 16.320218 |
| H | 13.108424 | 2.085236  | 16.590821 |
| H | 9.936458  | -0.926243 | 13.685624 |
| H | 11.558345 | -1.111781 | 14.363961 |
| H | 11.158863 | 0.318971  | 13.403219 |

250

Coupling adduct - septet

|   |          |          |          |
|---|----------|----------|----------|
| C | 19.56001 | 6.69484  | 9.97833  |
| C | 18.87616 | 7.59831  | 10.83927 |
| C | 17.55671 | 7.79496  | 10.38010 |
| C | 17.37476 | 6.94932  | 9.23398  |
| C | 18.61474 | 6.26021  | 8.99193  |
| C | 16.64182 | 8.92245  | 10.82410 |
| C | 16.77927 | 9.28765  | 12.30183 |
| C | 16.17409 | 7.12565  | 8.30703  |
| C | 15.31989 | 5.90289  | 7.96695  |
| C | 18.90999 | 5.41079  | 7.76141  |
| C | 19.61254 | 4.07856  | 8.04954  |
| C | 21.07472 | 6.73780  | 9.80264  |
| C | 21.91580 | 6.69426  | 11.07965 |
| C | 16.89153 | 10.17453 | 9.96430  |
| C | 16.57354 | 7.84243  | 7.00256  |

|    |          |          |          |
|----|----------|----------|----------|
| C  | 19.69819 | 6.16671  | 6.67358  |
| C  | 21.43374 | 8.03908  | 9.05287  |
| U  | 17.68851 | 5.21343  | 11.56369 |
| S  | 15.58803 | 3.30178  | 12.15374 |
| Ir | 16.49175 | 2.66044  | 10.03662 |
| C  | 17.05781 | 0.89254  | 8.80637  |
| C  | 16.27829 | 1.79042  | 7.99504  |
| C  | 14.95584 | 1.88326  | 8.57791  |
| C  | 14.93862 | 1.03438  | 9.73331  |
| C  | 16.22472 | 0.40707  | 9.87849  |
| C  | 16.68140 | 2.33082  | 6.66004  |
| C  | 13.77345 | 2.58112  | 7.98246  |
| C  | 13.74962 | 0.77604  | 10.60270 |
| C  | 16.56511 | -0.69642 | 10.82900 |
| C  | 18.43717 | 0.40271  | 8.49309  |
| S  | 15.10486 | 6.17232  | 11.65513 |
| C  | 14.48537 | 4.63315  | 12.03037 |
| C  | 19.65787 | 5.46931  | 13.47598 |
| C  | 18.56104 | 5.99860  | 14.20803 |
| C  | 17.67257 | 4.90844  | 14.47513 |
| C  | 18.31268 | 3.69898  | 13.99098 |
| C  | 19.54412 | 4.05475  | 13.37745 |
| C  | 18.60535 | 7.36051  | 14.89633 |
| C  | 19.73975 | 8.27110  | 14.41715 |
| C  | 16.34583 | 4.91249  | 15.23718 |
| C  | 15.60649 | 6.25660  | 15.28459 |
| C  | 17.89441 | 2.30606  | 14.44048 |
| C  | 18.70786 | 1.90162  | 15.68854 |
| C  | 20.68026 | 3.11773  | 12.99008 |
| C  | 20.91373 | 2.95107  | 11.48388 |
| C  | 18.80543 | 7.16871  | 16.41183 |
| C  | 16.42224 | 4.34321  | 16.66920 |
| C  | 17.95768 | 1.16326  | 13.42022 |
| C  | 21.98299 | 3.50798  | 13.70560 |
| C  | 10.14436 | 4.78574  | 14.84775 |
| S  | 9.09733  | 3.41316  | 14.72045 |

|    |          |          |          |
|----|----------|----------|----------|
| Ir | 8.20631  | 2.67974  | 16.81094 |
| C  | 7.95895  | 1.28299  | 18.52421 |
| C  | 9.26352  | 1.89393  | 18.64432 |
| C  | 10.03299 | 1.53925  | 17.49726 |
| C  | 9.22850  | 0.64605  | 16.67798 |
| C  | 7.96171  | 0.49158  | 17.30674 |
| C  | 9.76889  | 2.63360  | 19.84049 |
| C  | 11.46688 | 1.88225  | 17.24232 |
| C  | 9.72305  | -0.04401 | 15.44683 |
| C  | 6.85503  | -0.42216 | 16.88126 |
| C  | 6.93374  | 1.18867  | 19.60900 |
| S  | 9.46395  | 6.29231  | 15.23862 |
| U  | 6.91800  | 5.22708  | 15.34553 |
| C  | 4.93133  | 5.41652  | 13.44830 |
| C  | 6.00543  | 5.97812  | 12.70649 |
| C  | 6.92326  | 4.91482  | 12.42984 |
| C  | 6.32314  | 3.68669  | 12.91823 |
| C  | 5.08738  | 4.00550  | 13.54328 |
| C  | 5.91404  | 7.33849  | 12.01957 |
| C  | 4.75158  | 8.20962  | 12.50480 |
| C  | 8.24085  | 4.95931  | 11.65282 |
| C  | 8.94141  | 6.32417  | 11.60209 |
| C  | 6.77924  | 2.30737  | 12.46223 |
| C  | 5.96466  | 1.87811  | 11.22332 |
| C  | 3.98276  | 3.03500  | 13.93955 |
| C  | 3.76413  | 2.86185  | 15.44735 |
| C  | 5.71235  | 7.14343  | 10.50456 |
| C  | 8.16423  | 4.39155  | 10.22021 |
| C  | 6.76219  | 1.16230  | 13.48213 |
| C  | 2.66383  | 3.38657  | 13.23361 |
| C  | 5.65944  | 7.57769  | 16.07414 |
| C  | 5.01269  | 6.65347  | 16.94153 |
| C  | 5.97958  | 6.25184  | 17.92155 |
| C  | 7.19436  | 6.97985  | 17.66751 |
| C  | 6.97512  | 7.81833  | 16.52202 |
| C  | 3.49850  | 6.65078  | 17.12833 |

|   |          |          |          |
|---|----------|----------|----------|
| C | 2.65018  | 6.57621  | 15.85734 |
| C | 7.84577  | 8.97808  | 16.07134 |
| C | 7.69265  | 9.33181  | 14.59224 |
| C | 8.39931  | 7.19132  | 18.58105 |
| C | 9.28050  | 5.98885  | 18.92429 |
| C | 5.72003  | 5.39778  | 19.15686 |
| C | 5.04881  | 4.04744  | 18.88055 |
| C | 7.54897  | 10.22346 | 16.92603 |
| C | 7.99587  | 7.90740  | 19.88480 |
| C | 4.92363  | 6.13689  | 20.25046 |
| C | 3.10490  | 7.94322  | 17.87565 |
| H | 17.95693 | 2.93530  | 10.69655 |
| H | 16.58152 | 4.22592  | 9.63684  |
| H | 13.42442 | 4.48087  | 12.21852 |
| H | 19.35028 | 8.16904  | 11.62350 |
| H | 15.60042 | 8.61585  | 10.66710 |
| H | 17.92219 | 10.52621 | 10.08575 |
| H | 16.21928 | 10.98623 | 10.26521 |
| H | 16.72817 | 9.98084  | 8.90138  |
| H | 16.57536 | 8.42787  | 12.94413 |
| H | 16.06530 | 10.07537 | 12.56422 |
| H | 17.78100 | 9.66447  | 12.53406 |
| H | 15.50251 | 7.80588  | 8.84198  |
| H | 15.68038 | 8.22002  | 6.49162  |
| H | 17.07864 | 7.16100  | 6.31145  |
| H | 17.24262 | 8.68874  | 7.18422  |
| H | 15.88932 | 5.14721  | 7.41931  |
| H | 14.48125 | 6.21394  | 7.33188  |
| H | 14.91952 | 5.43446  | 8.86711  |
| H | 17.93633 | 5.15846  | 7.32922  |
| H | 19.66080 | 5.60797  | 5.73085  |
| H | 20.75332 | 6.27159  | 6.94275  |
| H | 19.29797 | 7.16610  | 6.48655  |
| H | 20.58518 | 4.21900  | 8.52889  |
| H | 19.79938 | 3.54422  | 7.10945  |
| H | 18.99750 | 3.44617  | 8.69465  |



|   |          |         |          |
|---|----------|---------|----------|
| H | 21.38481 | 5.89596 | 9.17483  |
| H | 22.49217 | 8.04139 | 8.76643  |
| H | 21.25932 | 8.90566 | 9.69998  |
| H | 20.83328 | 8.17552 | 8.15180  |
| H | 22.97364 | 6.83619 | 10.83243 |
| H | 21.82638 | 5.74396 | 11.60564 |
| H | 21.63611 | 7.49712 | 11.77041 |
| H | 20.52620 | 6.04144 | 13.18818 |
| H | 17.66190 | 7.89592 | 14.75013 |
| H | 17.99011 | 6.61338 | 16.87466 |
| H | 18.87452 | 8.14137 | 16.91280 |
| H | 19.73524 | 6.62197 | 16.60466 |
| H | 20.71895 | 7.83163 | 14.63723 |
| H | 19.68803 | 9.23069 | 14.94178 |
| H | 19.69754 | 8.48043 | 13.34901 |
| H | 20.41081 | 2.12875 | 13.36874 |
| H | 22.36947 | 4.47139 | 13.35736 |
| H | 22.76062 | 2.75765 | 13.52207 |
| H | 21.83080 | 3.58522 | 14.78654 |
| H | 20.02503 | 2.55080 | 10.98698 |
| H | 21.74402 | 2.25957 | 11.29667 |
| H | 21.16855 | 3.90079 | 11.00354 |
| H | 16.84208 | 2.38140 | 14.73588 |
| H | 17.49057 | 1.43090 | 12.47117 |
| H | 17.43734 | 0.28893 | 13.82792 |
| H | 18.98394 | 0.84824 | 13.20744 |
| H | 19.75184 | 1.70088 | 15.42545 |
| H | 18.29992 | 0.98586 | 16.13319 |
| H | 18.70989 | 2.68193 | 16.45314 |
| H | 15.68800 | 4.23253 | 14.67933 |
| H | 16.70227 | 3.28943 | 16.68800 |
| H | 15.43904 | 4.42853 | 17.14621 |
| H | 17.13773 | 4.88598 | 17.29397 |
| H | 16.06677 | 6.96342 | 15.98083 |
| H | 14.58098 | 6.09142 | 15.63224 |
| H | 15.54440 | 6.72242 | 14.29919 |

|   |          |          |          |
|---|----------|----------|----------|
| H | 17.63122 | -0.71060 | 11.06713 |
| H | 16.30887 | -1.67253 | 10.39537 |
| H | 16.01991 | -0.60013 | 11.77051 |
| H | 19.01438 | 1.14885  | 7.94359  |
| H | 18.38739 | -0.50398 | 7.87630  |
| H | 18.98978 | 0.15614  | 9.40281  |
| H | 17.74867 | 2.55418  | 6.61788  |
| H | 16.13509 | 3.24316  | 6.41192  |
| H | 16.46270 | 1.59448  | 5.87515  |
| H | 13.07913 | 2.92158  | 8.75436  |
| H | 13.22290 | 1.90910  | 7.31064  |
| H | 14.07324 | 3.45679  | 7.40389  |
| H | 14.04483 | 0.56372  | 11.63267 |
| H | 13.18657 | -0.08644 | 10.22458 |
| H | 13.07504 | 1.63494  | 10.62331 |
| H | 6.72146  | 2.93577  | 16.19118 |
| H | 8.04996  | 4.21216  | 17.29677 |
| H | 11.20903 | 4.67863  | 14.65031 |
| H | 5.15930  | 8.13190  | 15.29427 |
| H | 8.89845  | 8.71334  | 16.22867 |
| H | 6.50569  | 10.53522 | 16.80350 |
| H | 8.18977  | 11.05882 | 16.62116 |
| H | 7.72026  | 10.04067 | 17.98965 |
| H | 7.93446  | 8.47995  | 13.95249 |
| H | 8.37122  | 10.14945 | 14.32728 |
| H | 6.67535  | 9.66352  | 14.35901 |
| H | 9.05063  | 7.88238  | 18.03505 |
| H | 8.88493  | 8.30826  | 20.38508 |
| H | 7.51303  | 7.21854  | 20.58444 |
| H | 7.30585  | 8.73702  | 19.70477 |
| H | 8.73426  | 5.23029  | 19.48950 |
| H | 10.12057 | 6.32244  | 19.54598 |
| H | 9.68017  | 5.51717  | 18.02490 |
| H | 6.70450  | 5.17180  | 19.57987 |
| H | 4.98795  | 5.58433  | 21.19535 |
| H | 3.86272  | 6.20893  | 19.99318 |

|   |         |         |          |
|---|---------|---------|----------|
| H | 5.29613 | 7.14873 | 20.42787 |
| H | 4.06417 | 4.16399 | 18.41933 |
| H | 4.89749 | 3.50698 | 19.82203 |
| H | 5.66814 | 3.43030 | 18.22562 |
| H | 3.21879 | 5.80264 | 17.76148 |
| H | 2.04850 | 7.91487 | 18.16814 |
| H | 3.24976 | 8.81258 | 17.22497 |
| H | 3.70604 | 8.10047 | 18.77290 |
| H | 1.59013 | 6.68630 | 16.11141 |
| H | 2.76488 | 5.62718 | 15.33380 |
| H | 2.89985 | 7.38456 | 15.16149 |
| H | 4.04889 | 5.96276 | 13.74375 |
| H | 6.84000 | 7.90440 | 12.16263 |
| H | 6.54541 | 6.62210 | 10.03404 |
| H | 5.60208 | 8.11427 | 10.00743 |
| H | 4.80327 | 6.56156 | 10.31577 |
| H | 3.78712 | 7.74032 | 12.28118 |
| H | 4.77271 | 9.17400 | 11.98692 |
| H | 4.78637 | 8.41194 | 13.57444 |
| H | 4.27901 | 2.05433 | 13.55914 |
| H | 2.25414 | 4.33967 | 13.58353 |
| H | 1.90887 | 2.61530 | 13.42491 |
| H | 2.80508 | 3.46589 | 12.15133 |
| H | 4.66951 | 2.49489 | 15.94001 |
| H | 2.96037 | 2.14094 | 15.63948 |
| H | 3.47722 | 3.80203 | 15.92835 |
| H | 7.82534 | 2.41513 | 12.15502 |
| H | 7.24265 | 1.44317 | 14.42058 |
| H | 7.29448 | 0.30050 | 13.06224 |
| H | 5.74802 | 0.82532 | 13.71668 |
| H | 4.93148 | 1.64193 | 11.49912 |
| H | 6.39746 | 0.97752 | 10.77114 |
| H | 5.92710 | 2.65955 | 10.46079 |
| H | 8.92420 | 4.29683 | 12.20053 |
| H | 7.91664 | 3.32959 | 10.20255 |
| H | 9.13823 | 4.50802 | 9.73103  |

|   |          |          |          |
|---|----------|----------|----------|
| H | 7.42428  | 4.91261  | 9.60572  |
| H | 8.45572  | 7.01905  | 10.91111 |
| H | 9.96832  | 6.18883  | 11.24560 |
| H | 8.99848  | 6.79078  | 12.58746 |
| H | 5.87620  | -0.00159 | 17.12389 |
| H | 6.93935  | -1.38799 | 17.39585 |
| H | 6.87639  | -0.61290 | 15.80673 |
| H | 6.93428  | 2.07723  | 20.24359 |
| H | 7.13576  | 0.32053  | 20.25120 |
| H | 5.92619  | 1.07276  | 19.20347 |
| H | 8.95930  | 3.12573  | 20.38301 |
| H | 10.50265 | 3.39457  | 19.56839 |
| H | 10.25324 | 1.93221  | 20.53231 |
| H | 11.66419 | 1.98313  | 16.17252 |
| H | 12.13021 | 1.09889  | 17.63202 |
| H | 11.74447 | 2.82422  | 17.72100 |
| H | 8.91170  | -0.53678 | 14.90780 |
| H | 10.46379 | -0.80871 | 15.71195 |
| H | 10.19947 | 0.66156  | 14.75876 |

250

Coupling TS - septet

|   |          |          |          |
|---|----------|----------|----------|
| C | 6.76351  | 6.82592  | 15.78789 |
| C | 7.40617  | 7.69578  | 14.86866 |
| C | 8.75756  | 7.87576  | 15.24136 |
| C | 8.99593  | 7.05105  | 16.39420 |
| C | 7.76264  | 6.39070  | 16.72124 |
| C | 9.63538  | 9.00161  | 14.72271 |
| C | 9.39501  | 10.28542 | 15.53708 |
| C | 10.24157 | 7.22979  | 17.25829 |
| C | 9.92891  | 8.01067  | 18.54970 |
| C | 7.51944  | 5.56645  | 17.97849 |
| C | 6.77660  | 6.34087  | 19.08485 |
| C | 5.26338  | 6.87460  | 16.05321 |
| C | 4.93164  | 8.21775  | 16.73697 |
| C | 9.43006  | 9.30094  | 13.23626 |
| C | 11.06264 | 5.98836  | 17.61637 |

|    |          |          |          |
|----|----------|----------|----------|
| C  | 6.81014  | 4.22999  | 17.73091 |
| C  | 4.34445  | 6.71867  | 14.84075 |
| U  | 8.57049  | 5.23610  | 14.09404 |
| S  | 11.27092 | 6.31276  | 13.87949 |
| C  | 11.90273 | 4.73818  | 13.95246 |
| S  | 10.82818 | 3.38664  | 13.54800 |
| Ir | 9.92550  | 2.55302  | 15.60762 |
| C  | 10.93534 | 1.73306  | 17.43990 |
| C  | 11.62889 | 1.22995  | 16.30212 |
| C  | 10.70664 | 0.41042  | 15.53113 |
| C  | 9.44674  | 0.43467  | 16.18947 |
| C  | 9.56045  | 1.27856  | 17.36641 |
| C  | 13.08805 | 1.37150  | 16.00905 |
| C  | 11.08762 | -0.39654 | 14.33196 |
| C  | 8.22933  | -0.35251 | 15.81748 |
| C  | 8.55984  | 1.35349  | 18.47545 |
| C  | 11.53860 | 2.48155  | 18.58553 |
| C  | 13.50950 | 4.72050  | 12.35180 |
| S  | 14.22406 | 6.29126  | 12.28277 |
| U  | 16.74757 | 5.22387  | 12.10428 |
| Ir | 15.56415 | 2.64584  | 10.62218 |
| C  | 14.49163 | 1.84830  | 8.80257  |
| C  | 13.83366 | 1.34338  | 9.95963  |
| C  | 14.77896 | 0.51636  | 10.69278 |
| C  | 16.01773 | 0.53892  | 9.98994  |
| C  | 15.86496 | 1.38537  | 8.82252  |
| C  | 12.38426 | 1.48400  | 10.29455 |
| C  | 14.42389 | -0.32094 | 11.87893 |
| C  | 17.24121 | -0.25795 | 10.31818 |
| C  | 16.81509 | 1.45437  | 7.66996  |
| C  | 13.84419 | 2.58640  | 7.67591  |
| S  | 14.66067 | 3.40908  | 12.69891 |
| C  | 6.40069  | 5.34312  | 12.30832 |
| C  | 7.42243  | 5.91391  | 11.50582 |
| C  | 8.33745  | 4.85566  | 11.18599 |
| C  | 7.79908  | 3.63135  | 11.72928 |

|   |          |         |          |
|---|----------|---------|----------|
| C | 6.59625  | 3.94133 | 12.42638 |
| C | 7.28549  | 7.28186 | 10.84159 |
| C | 7.04377  | 7.13280 | 9.32757  |
| C | 9.60436  | 4.90084 | 10.33294 |
| C | 9.42772  | 4.36858 | 8.89589  |
| C | 8.24947  | 2.25431 | 11.26023 |
| C | 8.36432  | 1.13232 | 12.29778 |
| C | 5.54233  | 2.96661 | 12.93103 |
| C | 4.17017  | 3.26439 | 12.30670 |
| C | 6.11914  | 8.11199 | 11.38725 |
| C | 5.42956  | 2.87345 | 14.45719 |
| C | 7.34118  | 1.77287 | 10.10877 |
| C | 10.31844 | 6.25681 | 10.27618 |
| C | 18.87578 | 5.37614 | 13.84453 |
| C | 17.85784 | 5.94927 | 14.65499 |
| C | 16.94146 | 4.89593 | 14.97345 |
| C | 17.49244 | 3.66410 | 14.44302 |
| C | 18.69450 | 3.97118 | 13.74750 |
| C | 18.01242 | 7.30036 | 15.35251 |
| C | 18.24092 | 7.08704 | 16.86163 |
| C | 15.66788 | 4.95043 | 15.81845 |
| C | 15.81441 | 4.38229 | 17.24587 |
| C | 17.05568 | 2.29232 | 14.93921 |
| C | 16.99096 | 1.13189 | 13.94027 |
| C | 19.76757 | 2.99886 | 13.28063 |
| C | 21.09304 | 3.27118 | 14.01077 |
| C | 19.20150 | 8.13231 | 14.85952 |
| C | 19.98677 | 2.94920 | 11.76510 |
| C | 17.95349 | 1.87246 | 16.12248 |
| C | 14.97892 | 6.31866 | 15.90019 |
| C | 17.98758 | 7.59888 | 11.41822 |
| C | 16.65850 | 7.81953 | 10.99577 |
| C | 16.44081 | 6.99715 | 9.83904  |
| C | 17.67315 | 6.30951 | 9.54932  |
| C | 18.64821 | 6.72247 | 10.51530 |
| C | 15.78667 | 8.96471 | 11.48116 |

|   |          |          |          |
|---|----------|----------|----------|
| C | 16.06525 | 10.22611 | 10.64421 |
| C | 15.21516 | 7.19069  | 8.94957  |
| C | 15.56974 | 7.96676  | 7.66572  |
| C | 17.93864 | 5.49871  | 8.28721  |
| C | 18.67972 | 6.29904  | 7.19743  |
| C | 20.15492 | 6.78567  | 10.27603 |
| C | 20.45832 | 8.12528  | 9.56888  |
| C | 15.96745 | 9.29218  | 12.96369 |
| C | 14.38141 | 5.96537  | 8.57103  |
| C | 18.67004 | 4.17213  | 8.51646  |
| C | 21.07397 | 6.69154  | 11.49565 |
| H | 17.01858 | 2.93866  | 11.29085 |
| H | 15.70340 | 4.18716  | 10.13702 |
| H | 12.72327 | 4.49342  | 11.63356 |
| H | 18.47821 | 8.14852  | 12.20603 |
| H | 14.73323 | 8.69788  | 11.33637 |
| H | 17.10957 | 10.53979 | 10.75218 |
| H | 15.42763 | 11.05237 | 10.97797 |
| H | 15.87226 | 10.06339 | 9.58129  |
| H | 15.73910 | 8.43066  | 13.59560 |
| H | 15.29207 | 10.10277 | 13.25552 |
| H | 16.98862 | 9.62262  | 13.18312 |
| H | 14.54421 | 7.83296  | 9.52977  |
| H | 14.65722 | 8.35408  | 7.19883  |
| H | 16.05952 | 7.31949  | 6.93198  |
| H | 16.23482 | 8.81316  | 7.85993  |
| H | 14.94906 | 5.25215  | 7.96862  |
| H | 13.51940 | 6.28631  | 7.97459  |
| H | 14.01277 | 5.44060  | 9.45344  |
| H | 16.95583 | 5.24411  | 7.87741  |
| H | 18.61577 | 5.76805  | 6.24049  |
| H | 19.74229 | 6.40972  | 7.43247  |
| H | 18.26108 | 7.29798  | 7.05507  |
| H | 19.65562 | 4.31619  | 8.96619  |
| H | 18.82821 | 3.66431  | 7.55877  |
| H | 18.08688 | 3.51362  | 9.16440  |

|   |          |         |          |
|---|----------|---------|----------|
| H | 20.43739 | 5.98017 | 9.59147  |
| H | 21.49798 | 8.15140 | 9.22203  |
| H | 20.31543 | 8.95987 | 10.26392 |
| H | 19.80579 | 8.29570 | 8.71073  |
| H | 22.10782 | 6.88525 | 11.18981 |
| H | 21.05472 | 5.70682 | 11.96346 |
| H | 20.81866 | 7.44034 | 12.25276 |
| H | 19.74590 | 5.91098 | 13.49858 |
| H | 17.10577 | 7.90180 | 15.23225 |
| H | 17.39642 | 6.60712 | 17.35354 |
| H | 18.41025 | 8.04973 | 17.35722 |
| H | 19.12580 | 6.46236 | 17.02672 |
| H | 20.14861 | 7.61756 | 15.05567 |
| H | 19.22994 | 9.08411 | 15.39938 |
| H | 19.16336 | 8.36502 | 13.79623 |
| H | 19.44519 | 1.99906 | 13.58054 |
| H | 21.51980 | 4.23778 | 13.72367 |
| H | 21.83176 | 2.49901 | 13.76758 |
| H | 20.95333 | 3.28136 | 15.09603 |
| H | 19.08767 | 2.60561 | 11.24590 |
| H | 20.80401 | 2.26233 | 11.51532 |
| H | 20.24973 | 3.93156 | 11.36191 |
| H | 16.03648 | 2.41331 | 15.32092 |
| H | 16.45310 | 1.40256 | 13.03117 |
| H | 16.47718 | 0.28502 | 14.40930 |
| H | 17.98374 | 0.77730 | 13.64658 |
| H | 18.96182 | 1.62508 | 15.77455 |
| H | 17.54755 | 0.98060 | 16.61437 |
| H | 18.05039 | 2.66227 | 16.87104 |
| H | 14.95854 | 4.28868 | 15.30234 |
| H | 16.05419 | 3.31831 | 17.25392 |
| H | 14.86920 | 4.51157 | 17.78508 |
| H | 16.58973 | 4.89585 | 17.82087 |
| H | 15.51336 | 7.02066 | 16.54568 |
| H | 13.97836 | 6.19565 | 16.32642 |
| H | 14.85231 | 6.77129 | 14.91518 |



|   |          |          |          |
|---|----------|----------|----------|
| H | 18.15100 | 0.26193  | 10.00933 |
| H | 17.21516 | -1.22328 | 9.79701  |
| H | 17.31819 | -0.45689 | 11.38882 |
| H | 16.71654 | 2.39320  | 7.12141  |
| H | 16.61363 | 0.63495  | 6.96689  |
| H | 17.85427 | 1.36607  | 7.99239  |
| H | 14.56321 | 3.19914  | 7.12951  |
| H | 13.04169 | 3.24019  | 8.02240  |
| H | 13.40988 | 1.87152  | 6.96522  |
| H | 12.22117 | 1.62687  | 11.36573 |
| H | 11.83819 | 0.58133  | 9.99102  |
| H | 11.93250 | 2.33100  | 9.77436  |
| H | 15.30713 | -0.76966 | 12.33664 |
| H | 13.75430 | -1.13597 | 11.57697 |
| H | 13.90861 | 0.26526  | 12.64389 |
| H | 8.48273  | 2.86737  | 14.94213 |
| H | 9.76096  | 4.07362  | 16.10433 |
| H | 12.69715 | 4.53653  | 14.67183 |
| H | 6.89659  | 8.27326  | 14.11114 |
| H | 10.68896 | 8.72481  | 14.85260 |
| H | 8.35272  | 10.61059 | 15.44427 |
| H | 10.03739 | 11.09859 | 15.17809 |
| H | 9.60404  | 10.13668 | 16.59949 |
| H | 9.62710  | 8.42200  | 12.61684 |
| H | 10.10783 | 10.09733 | 12.90969 |
| H | 8.40765  | 9.63701  | 13.03227 |
| H | 10.91202 | 7.86371  | 16.66636 |
| H | 10.85601 | 8.36741  | 19.01445 |
| H | 9.42093  | 7.37732  | 19.28363 |
| H | 9.28875  | 8.87730  | 18.36074 |
| H | 10.49963 | 5.28635  | 18.23679 |
| H | 11.95164 | 6.28828  | 18.18565 |
| H | 11.38632 | 5.45053  | 16.72395 |
| H | 8.50784  | 5.31932  | 18.38024 |
| H | 6.83617  | 5.79247  | 20.03297 |
| H | 5.71514  | 6.46086  | 18.84912 |

|   |          |         |          |
|---|----------|---------|----------|
| H | 7.19754  | 7.33681 | 19.24483 |
| H | 5.82374  | 4.36664 | 17.27941 |
| H | 6.65817  | 3.70044 | 18.67877 |
| H | 7.40471  | 3.59135 | 17.07201 |
| H | 5.00516  | 6.07798 | 16.75850 |
| H | 3.88885  | 8.23623 | 17.07698 |
| H | 5.07047  | 9.04534 | 16.03259 |
| H | 5.57772  | 8.40657 | 17.59716 |
| H | 3.29966  | 6.85686 | 15.14197 |
| H | 4.42966  | 5.73159 | 14.38504 |
| H | 4.56198  | 7.46882 | 14.07320 |
| H | 5.52893  | 5.87719 | 12.65363 |
| H | 8.20127  | 7.86859 | 10.97679 |
| H | 7.88607  | 6.67725 | 8.80680  |
| H | 6.86424  | 8.11387 | 8.87136  |
| H | 6.16150  | 6.50886 | 9.14631  |
| H | 5.15916  | 7.63931 | 11.15113 |
| H | 6.11854  | 9.10507 | 10.92548 |
| H | 6.16609  | 8.24506 | 12.46720 |
| H | 5.83126  | 1.97167 | 12.58022 |
| H | 3.77204  | 4.22608 | 12.64711 |
| H | 3.44295  | 2.49130 | 12.58213 |
| H | 4.23398  | 3.30251 | 11.21486 |
| H | 6.37266  | 2.54287 | 14.90344 |
| H | 4.64823  | 2.16088 | 14.74961 |
| H | 5.17143  | 3.84083 | 14.89970 |
| H | 9.25814  | 2.38168 | 10.85000 |
| H | 8.97795  | 1.42599 | 13.15077 |
| H | 8.81599  | 0.24913 | 11.82859 |
| H | 7.38938  | 0.82348 | 12.68666 |
| H | 6.34357  | 1.51753 | 10.48156 |
| H | 7.75447  | 0.87317 | 9.63544  |
| H | 7.21251  | 2.53801 | 9.33894  |
| H | 10.30788 | 4.21582 | 10.82708 |
| H | 9.12932  | 3.31912 | 8.87481  |
| H | 10.37354 | 4.45695 | 8.34637  |

|   |          |          |          |
|---|----------|----------|----------|
| H | 8.67374  | 4.93202  | 8.33922  |
| H | 9.77853  | 6.99059  | 9.67204  |
| H | 11.30709 | 6.13469  | 9.81930  |
| H | 10.47092 | 6.67348  | 11.27415 |
| H | 7.31436  | 0.18162  | 16.08368 |
| H | 8.22103  | -1.31404 | 16.34694 |
| H | 8.19277  | -0.55870 | 14.74593 |
| H | 8.67416  | 2.27019  | 19.05734 |
| H | 8.68462  | 0.50404  | 19.16106 |
| H | 7.53504  | 1.32964  | 18.09897 |
| H | 10.80104 | 3.11805  | 19.07804 |
| H | 12.36270 | 3.12183  | 18.26379 |
| H | 11.92807 | 1.78092  | 19.33576 |
| H | 13.27029 | 1.56739  | 14.94894 |
| H | 13.62461 | 0.45156  | 16.27770 |
| H | 13.53093 | 2.18973  | 16.58127 |
| H | 10.20918 | -0.79634 | 13.82169 |
| H | 11.72144 | -1.24499 | 14.62124 |
| H | 11.64457 | 0.20668  | 13.60987 |

250

Complex 2 - triplet

|   |          |          |          |
|---|----------|----------|----------|
| C | 18.73302 | 6.74247  | 10.48581 |
| C | 18.05385 | 7.60307  | 11.38975 |
| C | 16.73521 | 7.83545  | 10.93968 |
| C | 16.54159 | 7.03641  | 9.76470  |
| C | 17.77840 | 6.35178  | 9.49084  |
| C | 15.84797 | 8.96463  | 11.43364 |
| C | 16.01830 | 9.27525  | 12.92106 |
| C | 15.33583 | 7.24242  | 8.85259  |
| C | 14.52449 | 6.01769  | 8.42666  |
| C | 18.07052 | 5.56587  | 8.21936  |
| C | 18.79998 | 4.23733  | 8.44091  |
| C | 20.24224 | 6.81748  | 10.26152 |
| C | 21.16074 | 6.68088  | 11.47744 |
| C | 16.11403 | 10.24077 | 10.61529 |
| C | 15.70761 | 8.05120  | 7.59396  |

|    |          |          |          |
|----|----------|----------|----------|
| C  | 18.82841 | 6.38554  | 7.15563  |
| C  | 20.54837 | 8.17946  | 9.60022  |
| U  | 16.76834 | 5.21664  | 12.03316 |
| S  | 14.68912 | 3.36134  | 12.56863 |
| Ir | 15.63097 | 2.66138  | 10.49267 |
| C  | 16.01719 | 1.42610  | 8.68951  |
| C  | 14.63844 | 1.86401  | 8.63332  |
| C  | 13.95486 | 1.33090  | 9.76324  |
| C  | 14.89138 | 0.50977  | 10.51305 |
| C  | 16.14938 | 0.56628  | 9.84969  |
| C  | 14.01516 | 2.61242  | 7.49946  |
| C  | 12.49176 | 1.43074  | 10.04724 |
| C  | 14.51706 | -0.34180 | 11.68294 |
| C  | 17.37822 | -0.21186 | 10.20226 |
| C  | 16.99924 | 1.52061  | 7.56554  |
| S  | 14.31560 | 6.25061  | 12.14687 |
| C  | 13.40204 | 4.67548  | 12.33567 |
| C  | 12.37826 | 4.67762  | 13.49389 |
| S  | 11.09276 | 3.36049  | 13.26073 |
| Ir | 10.15326 | 2.65082  | 15.33563 |
| C  | 9.77228  | 1.41599  | 17.13969 |
| C  | 11.15142 | 1.85422  | 17.19377 |
| C  | 11.83338 | 1.32135  | 16.06311 |
| C  | 10.89567 | 0.50224  | 15.31310 |
| C  | 9.63832  | 0.55782  | 15.97894 |
| C  | 11.77621 | 2.60248  | 18.32689 |
| C  | 13.29584 | 1.42223  | 15.77658 |
| C  | 11.26774 | -0.34856 | 14.14188 |
| C  | 8.40937  | -0.22054 | 15.62700 |
| C  | 8.79223  | 1.50960  | 18.26551 |
| S  | 11.46552 | 6.25260  | 13.67374 |
| U  | 9.00546  | 5.21631  | 13.80186 |
| C  | 18.93481 | 5.32086  | 13.75721 |
| C  | 17.92147 | 5.89173  | 14.57364 |
| C  | 17.00701 | 4.83391  | 14.89223 |
| C  | 17.55052 | 3.60730  | 14.35064 |

|   |          |         |          |
|---|----------|---------|----------|
| C | 18.74845 | 3.91854 | 13.65021 |
| C | 18.08515 | 7.23780 | 15.28073 |
| C | 19.30037 | 8.04682 | 14.81231 |
| C | 15.73906 | 4.88484 | 15.74214 |
| C | 15.04356 | 6.24975 | 15.81003 |
| C | 17.10978 | 2.23185 | 14.83031 |
| C | 18.00977 | 1.78566 | 16.00192 |
| C | 19.81569 | 2.94776 | 13.16852 |
| C | 20.04084 | 2.92952 | 11.65350 |
| C | 18.28326 | 7.02579 | 16.79426 |
| C | 15.89716 | 4.32345 | 17.17084 |
| C | 17.03125 | 1.08969 | 13.81151 |
| C | 21.14031 | 3.19621 | 13.90915 |
| C | 6.84028  | 5.32465 | 12.06508 |
| C | 7.85347  | 5.89359 | 11.24649 |
| C | 8.76921  | 4.83782 | 10.93318 |
| C | 8.22685  | 3.61155 | 11.48079 |
| C | 7.02667  | 3.92275 | 12.17753 |
| C | 7.69400  | 7.24236 | 10.54456 |
| C | 6.48282  | 8.05440 | 11.01802 |
| C | 10.03666 | 4.88609 | 10.08252 |
| C | 10.73477 | 6.24952 | 10.01270 |
| C | 8.66679  | 2.23573 | 11.00081 |
| C | 7.76512  | 1.79108 | 9.82976  |
| C | 5.95901  | 2.95231 | 12.65913 |
| C | 5.73851  | 2.92925 | 14.17480 |
| C | 7.49410  | 7.03624 | 9.03045  |
| C | 9.87556  | 4.32406 | 8.65433  |
| C | 8.74532  | 1.09276 | 12.01855 |
| C | 4.63240  | 3.20397 | 11.92332 |
| C | 7.73270  | 7.60355 | 14.44760 |
| C | 7.05578  | 6.73992 | 15.35099 |
| C | 8.01340  | 6.34626 | 16.34210 |
| C | 9.24878  | 7.03165 | 16.06585 |
| C | 9.05293  | 7.83342 | 14.89233 |
| C | 5.54705  | 6.81440 | 15.57801 |

|   |          |          |          |
|---|----------|----------|----------|
| C | 4.62786  | 6.68204  | 14.36218 |
| C | 9.93933  | 8.96287  | 14.39796 |
| C | 9.76423  | 9.27554  | 12.91149 |
| C | 10.45806 | 7.23337  | 16.97389 |
| C | 11.26832 | 6.00609  | 17.39403 |
| C | 7.72432  | 5.55707  | 17.61224 |
| C | 6.99503  | 4.22878  | 17.38854 |
| C | 9.67774  | 10.23787 | 15.21936 |
| C | 10.09062 | 8.03988  | 18.23532 |
| C | 6.96841  | 6.37420  | 18.67922 |
| C | 5.24198  | 8.17425  | 16.24421 |
| H | 17.06912 | 2.98024  | 11.18453 |
| H | 15.71959 | 4.20815  | 10.03719 |
| H | 12.88355 | 4.48189  | 11.39233 |
| H | 18.52606 | 8.14211  | 12.19574 |
| H | 14.79900 | 8.68255  | 11.28375 |
| H | 17.15499 | 10.56393 | 10.72932 |
| H | 15.46735 | 11.05620 | 10.95932 |
| H | 15.92492 | 10.09140 | 9.54973  |
| H | 15.78891 | 8.40245  | 13.53666 |
| H | 15.33596 | 10.07831 | 13.21877 |
| H | 17.03627 | 9.60937  | 13.15121 |
| H | 14.64472 | 7.86146  | 9.43442  |
| H | 14.80095 | 8.44034  | 7.11633  |
| H | 16.21825 | 7.42497  | 6.85588  |
| H | 16.36096 | 8.89898  | 7.81953  |
| H | 15.10976 | 5.32730  | 7.81386  |
| H | 13.66751 | 6.34241  | 7.82431  |
| H | 14.15441 | 5.46808  | 9.29307  |
| H | 17.09693 | 5.31478  | 7.78594  |
| H | 18.79089 | 5.86645  | 6.19047  |
| H | 19.88427 | 6.50425  | 7.41551  |
| H | 18.40350 | 7.38242  | 7.01727  |
| H | 19.77985 | 4.37604  | 8.90438  |
| H | 18.96959 | 3.73906  | 7.47997  |
| H | 18.20949 | 3.57374  | 9.07682  |

|   |          |         |          |
|---|----------|---------|----------|
| H | 20.53014 | 6.03667 | 9.55109  |
| H | 21.59186 | 8.22160 | 9.26565  |
| H | 20.39295 | 8.99169 | 10.31879 |
| H | 19.90407 | 8.37293 | 8.74044  |
| H | 22.19496 | 6.88506 | 11.17865 |
| H | 21.14165 | 5.68009 | 11.91015 |
| H | 20.90576 | 7.40240 | 12.26044 |
| H | 19.80259 | 5.85583 | 13.40743 |
| H | 17.19329 | 7.85777 | 15.14211 |
| H | 17.41655 | 6.57828 | 17.27787 |
| H | 18.47710 | 7.98569 | 17.28686 |
| H | 19.14488 | 6.37375 | 16.97621 |
| H | 20.23234 | 7.51526 | 15.03486 |
| H | 19.33242 | 9.00186 | 15.34659 |
| H | 19.29339 | 8.27118 | 13.74692 |
| H | 19.48625 | 1.94364 | 13.44620 |
| H | 21.57089 | 4.16815 | 13.64701 |
| H | 21.87734 | 2.42717 | 13.65018 |
| H | 20.99666 | 3.18144 | 14.99393 |
| H | 19.14136 | 2.60121 | 11.12555 |
| H | 20.85721 | 2.24599 | 11.39094 |
| H | 20.30532 | 3.92003 | 11.27217 |
| H | 16.09347 | 2.35386 | 15.21889 |
| H | 16.50146 | 1.38700 | 12.90588 |
| H | 16.50253 | 0.24138 | 14.26174 |
| H | 18.02035 | 0.72570 | 13.51641 |
| H | 19.01654 | 1.54350 | 15.64568 |
| H | 17.60453 | 0.88465 | 16.47839 |
| H | 18.11165 | 2.56073 | 16.76539 |
| H | 15.03221 | 4.21624 | 15.23149 |
| H | 16.14006 | 3.25965 | 17.17959 |
| H | 14.95686 | 4.45314 | 17.71958 |
| H | 16.67705 | 4.83895 | 17.73766 |
| H | 15.58188 | 6.96712 | 16.43483 |
| H | 14.04887 | 6.12876 | 16.24980 |
| H | 14.90405 | 6.67889 | 14.81592 |

|   |          |          |          |
|---|----------|----------|----------|
| H | 18.28630 | 0.33734  | 9.94316  |
| H | 17.39521 | -1.16224 | 9.65365  |
| H | 17.42036 | -0.43914 | 11.26913 |
| H | 16.90252 | 2.46259  | 7.02209  |
| H | 16.83237 | 0.70401  | 6.84990  |
| H | 18.02985 | 1.44664  | 7.91760  |
| H | 14.74312 | 3.24441  | 6.98792  |
| H | 13.19624 | 3.25240  | 7.83327  |
| H | 13.61135 | 1.90637  | 6.76224  |
| H | 12.28968 | 1.58731  | 11.10976 |
| H | 11.98249 | 0.50799  | 9.73873  |
| H | 12.03677 | 2.25689  | 9.49720  |
| H | 15.39234 | -0.80527 | 12.14165 |
| H | 13.84114 | -1.14599 | 11.36579 |
| H | 14.00479 | 0.24239  | 12.45191 |
| H | 8.71489  | 2.96465  | 14.64524 |
| H | 10.05094 | 4.19777  | 15.79223 |
| H | 12.89547 | 4.48451  | 14.43804 |
| H | 7.25876  | 8.14203  | 13.64200 |
| H | 10.98837 | 8.67891  | 14.54358 |
| H | 8.63700  | 10.56314 | 15.10908 |
| H | 10.32476 | 11.05288 | 14.87503 |
| H | 9.86973  | 10.08626 | 16.28412 |
| H | 9.99101  | 8.40321  | 12.29424 |
| H | 10.44641 | 10.07822 | 12.61246 |
| H | 8.74588  | 9.61111  | 12.68501 |
| H | 11.14814 | 7.85257  | 16.39110 |
| H | 10.99921 | 8.42675  | 18.71104 |
| H | 9.58119  | 7.41280  | 18.97350 |
| H | 9.43790  | 8.88912  | 18.01339 |
| H | 10.68388 | 5.31471  | 18.00637 |
| H | 12.12753 | 6.32784  | 17.99476 |
| H | 11.63493 | 5.45870  | 16.52474 |
| H | 8.69881  | 5.30536  | 18.04306 |
| H | 7.00848  | 5.85315  | 19.64319 |
| H | 5.91185  | 6.49281  | 18.42212 |



|   |          |         |          |
|---|----------|---------|----------|
| H | 7.39321  | 7.37101 | 18.81868 |
| H | 6.01602  | 4.36785 | 16.92333 |
| H | 6.82361  | 3.73015 | 18.34893 |
| H | 7.58690  | 3.56519 | 16.75381 |
| H | 5.26008  | 6.03113 | 16.28610 |
| H | 4.19906  | 8.21512 | 16.58064 |
| H | 5.39597  | 8.98883 | 15.52799 |
| H | 5.88766  | 8.36505 | 17.10351 |
| H | 3.59376  | 6.88492 | 14.66222 |
| H | 4.64719  | 5.68279 | 13.92604 |
| H | 4.88227  | 7.40638 | 13.58156 |
| H | 5.97289  | 5.86110 | 12.41420 |
| H | 8.58870  | 7.85793 | 10.68464 |
| H | 8.35875  | 6.58651 | 8.54511  |
| H | 7.30412  | 7.99855 | 8.54112  |
| H | 6.62966  | 6.38840 | 8.84686  |
| H | 5.54821  | 7.52773 | 10.79487 |
| H | 6.45372  | 9.01168 | 10.48763 |
| H | 6.49240  | 8.27466 | 12.08440 |
| H | 6.28667  | 1.94873 | 12.37733 |
| H | 4.20293  | 4.17518 | 12.19006 |
| H | 3.89565  | 2.43455 | 12.18189 |
| H | 4.77279  | 3.19275 | 10.83807 |
| H | 6.64035  | 2.60166 | 14.69926 |
| H | 4.92450  | 2.24314 | 14.43798 |
| H | 5.47252  | 3.91819 | 14.55915 |
| H | 9.68283  | 2.35723 | 10.61133 |
| H | 9.28240  | 1.38653 | 12.92099 |
| H | 9.26675  | 0.24203 | 11.56435 |
| H | 7.75620  | 0.73392 | 12.31973 |
| H | 6.75942  | 1.54630 | 10.18719 |
| H | 8.17103  | 0.89193 | 9.35041  |
| H | 7.66056  | 2.56782 | 9.06840  |
| H | 10.74256 | 4.21678 | 10.59329 |
| H | 9.63055  | 3.26075 | 8.64631  |
| H | 10.81537 | 4.45157 | 8.10428  |

|   |          |          |          |
|---|----------|----------|----------|
| H | 9.09601  | 4.84102  | 8.08830  |
| H | 10.19558 | 6.96850  | 9.39046  |
| H | 11.72718 | 6.12642  | 9.56827  |
| H | 10.87973 | 6.67718  | 11.00668 |
| H | 7.50137  | 0.32606  | 15.89183 |
| H | 8.39577  | -1.17360 | 16.17101 |
| H | 8.36389  | -0.44278 | 14.55918 |
| H | 8.88970  | 2.45134  | 18.80929 |
| H | 8.96047  | 0.69274  | 18.98052 |
| H | 7.76099  | 1.43561  | 17.91522 |
| H | 11.04862 | 3.23346  | 18.84024 |
| H | 12.59378 | 3.24342  | 17.99165 |
| H | 12.18223 | 1.89656  | 19.06303 |
| H | 13.49573 | 1.58266  | 14.71424 |
| H | 13.80576 | 0.49836  | 16.08062 |
| H | 13.75198 | 2.24633  | 16.32870 |
| H | 10.39089 | -0.80674 | 13.68082 |
| H | 11.93924 | -1.15685 | 14.45808 |
| H | 11.78393 | 0.23476  | 13.37492 |

250

Complex 2 - quintet

|   |          |          |          |
|---|----------|----------|----------|
| C | 18.72846 | 6.74355  | 10.48123 |
| C | 18.05191 | 7.60624  | 11.38583 |
| C | 16.73186 | 7.83745  | 10.94132 |
| C | 16.53564 | 7.03750  | 9.76663  |
| C | 17.77065 | 6.35190  | 9.48947  |
| C | 15.84598 | 8.96666  | 11.43718 |
| C | 16.02141 | 9.27750  | 12.92398 |
| C | 15.32651 | 7.24114  | 8.85883  |
| C | 14.51532 | 6.01491  | 8.43739  |
| C | 18.05941 | 5.56431  | 8.21829  |
| C | 18.78792 | 4.23533  | 8.44045  |
| C | 20.23719 | 6.81760  | 10.25395 |
| C | 21.15693 | 6.68214  | 11.46901 |
| C | 16.10805 | 10.24251 | 10.61729 |
| C | 15.69444 | 8.04880  | 7.59830  |

|    |          |          |          |
|----|----------|----------|----------|
| C  | 18.81594 | 6.38241  | 7.15248  |
| C  | 20.54289 | 8.17853  | 9.59028  |
| U  | 16.77815 | 5.21876  | 12.02833 |
| S  | 14.68983 | 3.36346  | 12.56817 |
| Ir | 15.62888 | 2.65550  | 10.49225 |
| C  | 16.00949 | 1.42292  | 8.68670  |
| C  | 14.63044 | 1.86151  | 8.63338  |
| C  | 13.94845 | 1.32728  | 9.76341  |
| C  | 14.88614 | 0.50711  | 10.51230 |
| C  | 16.14342 | 0.56329  | 9.84639  |
| C  | 14.00570 | 2.61199  | 7.50169  |
| C  | 12.48602 | 1.42798  | 10.05019 |
| C  | 14.51422 | -0.34483 | 11.68274 |
| C  | 17.37225 | -0.21579 | 10.19718 |
| C  | 16.98940 | 1.51766  | 7.56084  |
| S  | 14.31907 | 6.25577  | 12.15698 |
| C  | 13.40485 | 4.68136  | 12.33594 |
| C  | 12.37961 | 4.68056  | 13.49314 |
| S  | 11.09553 | 3.36200  | 13.25990 |
| Ir | 10.15707 | 2.65167  | 15.33525 |
| C  | 9.77761  | 1.41777  | 17.14023 |
| C  | 11.15653 | 1.85678  | 17.19341 |
| C  | 11.83832 | 1.32352  | 16.06283 |
| C  | 10.90071 | 0.50349  | 15.31372 |
| C  | 9.64360  | 0.55883  | 15.98006 |
| C  | 11.78136 | 2.60632  | 18.32566 |
| C  | 13.30061 | 1.42499  | 15.77561 |
| C  | 11.27265 | -0.34773 | 14.14276 |
| C  | 8.41497  | -0.22049 | 15.62911 |
| C  | 8.79812  | 1.51156  | 18.26654 |
| S  | 11.46428 | 6.25419  | 13.67336 |
| U  | 9.00594  | 5.21540  | 13.80139 |
| C  | 18.94488 | 5.32491  | 13.76465 |
| C  | 17.93221 | 5.89367  | 14.58393 |
| C  | 17.01604 | 4.83806  | 14.89662 |
| C  | 17.55765 | 3.61201  | 14.34781 |

|   |          |         |          |
|---|----------|---------|----------|
| C | 18.75782 | 3.92322 | 13.65102 |
| C | 18.09264 | 7.24185 | 15.28684 |
| C | 19.30522 | 8.05288 | 14.81503 |
| C | 15.74865 | 4.88633 | 15.74736 |
| C | 15.05105 | 6.24999 | 15.81765 |
| C | 17.11705 | 2.23598 | 14.82651 |
| C | 18.01833 | 1.78985 | 15.99730 |
| C | 19.82503 | 2.95266 | 13.16860 |
| C | 20.04475 | 2.92937 | 11.65280 |
| C | 18.29130 | 7.03460 | 16.80096 |
| C | 15.90964 | 4.32360 | 17.17528 |
| C | 17.03813 | 1.09404 | 13.80763 |
| C | 21.15208 | 3.20389 | 13.90375 |
| C | 6.83944  | 5.32101 | 12.06542 |
| C | 7.85165  | 5.89125 | 11.24658 |
| C | 8.76869  | 4.83664 | 10.93306 |
| C | 8.22798  | 3.60968 | 11.48075 |
| C | 7.02759  | 3.91937 | 12.17784 |
| C | 7.69019  | 7.24004 | 10.54513 |
| C | 6.47700  | 8.04928 | 11.01833 |
| C | 10.03595 | 4.88661 | 10.08226 |
| C | 10.73271 | 6.25077 | 10.01336 |
| C | 8.66957  | 2.23441 | 11.00078 |
| C | 7.76832  | 1.78839 | 9.82992  |
| C | 5.96101  | 2.94759 | 12.65923 |
| C | 5.74100  | 2.92272 | 14.17495 |
| C | 7.49165  | 7.03470 | 9.03074  |
| C | 9.87492  | 4.32540 | 8.65377  |
| C | 8.74980  | 1.09176 | 12.01874 |
| C | 4.63387  | 3.19864 | 11.92415 |
| C | 7.73102  | 7.60201 | 14.44635 |
| C | 7.05502  | 6.73796 | 15.35005 |
| C | 8.01319  | 6.34553 | 16.34115 |
| C | 9.24783  | 7.03206 | 16.06463 |
| C | 9.05107  | 7.83326 | 14.89089 |
| C | 5.54629  | 6.81088 | 15.57765 |

|   |          |          |          |
|---|----------|----------|----------|
| C | 4.62643  | 6.67563  | 14.36267 |
| C | 9.93628  | 8.96346  | 14.39609 |
| C | 9.76066  | 9.27555  | 12.90957 |
| C | 10.45691 | 7.23538  | 16.97258 |
| C | 11.26846 | 6.00911  | 17.39320 |
| C | 7.72493  | 5.55637  | 17.61148 |
| C | 6.99697  | 4.22733  | 17.38786 |
| C | 9.67357  | 10.23843 | 15.21715 |
| C | 10.08856 | 8.04191  | 18.23370 |
| C | 6.96825  | 6.37296  | 18.67832 |
| C | 5.23981  | 8.17103  | 16.24252 |
| H | 17.06756 | 2.96843  | 11.18253 |
| H | 15.73065 | 4.20302  | 10.03753 |
| H | 12.88802 | 4.48927  | 11.39136 |
| H | 18.52573 | 8.14261  | 12.19288 |
| H | 14.79681 | 8.68327  | 11.29138 |
| H | 17.14894 | 10.56721 | 10.72791 |
| H | 15.46139 | 11.05740 | 10.96262 |
| H | 15.91595 | 10.09227 | 9.55235  |
| H | 15.79415 | 8.40459  | 13.54022 |
| H | 15.33974 | 10.08025 | 13.22402 |
| H | 17.04001 | 9.61220  | 13.15071 |
| H | 14.63687 | 7.86013  | 9.44236  |
| H | 14.78609 | 8.43670  | 7.12296  |
| H | 16.20352 | 7.42219  | 6.85948  |
| H | 16.34765 | 8.89742  | 7.82115  |
| H | 15.09939 | 5.32345  | 7.82478  |
| H | 13.65667 | 6.33794  | 7.83654  |
| H | 14.14785 | 5.46730  | 9.30617  |
| H | 17.08483 | 5.31370  | 7.78699  |
| H | 18.77590 | 5.86257  | 6.18785  |
| H | 19.87247 | 6.50033  | 7.40998  |
| H | 18.39157 | 7.37956  | 7.01416  |
| H | 19.76709 | 4.37331  | 8.90562  |
| H | 18.95886 | 3.73755  | 7.47953  |
| H | 18.19577 | 3.57150  | 9.07467  |

|   |          |         |          |
|---|----------|---------|----------|
| H | 20.52340 | 6.03558 | 9.54419  |
| H | 21.58585 | 8.21958 | 9.25401  |
| H | 20.38913 | 8.99186 | 10.30796 |
| H | 19.89734 | 8.37113 | 8.73126  |
| H | 22.19109 | 6.88424 | 11.16870 |
| H | 21.13659 | 5.68224 | 11.90361 |
| H | 20.90389 | 7.40557 | 12.25094 |
| H | 19.81232 | 5.86130 | 13.41563 |
| H | 17.19873 | 7.85853 | 15.14655 |
| H | 17.42592 | 6.58531 | 17.28539 |
| H | 18.48176 | 7.99642 | 17.29108 |
| H | 19.15505 | 6.38588 | 16.98477 |
| H | 20.23893 | 7.52467 | 15.03833 |
| H | 19.33515 | 9.00943 | 15.34670 |
| H | 19.29719 | 8.27476 | 13.74894 |
| H | 19.49733 | 1.94913 | 13.45055 |
| H | 21.58174 | 4.17499 | 13.63690 |
| H | 21.88846 | 2.43426 | 13.64475 |
| H | 21.01219 | 3.19262 | 14.98906 |
| H | 19.14274 | 2.60153 | 11.12880 |
| H | 20.85867 | 2.24321 | 11.38948 |
| H | 20.31053 | 3.91816 | 11.26786 |
| H | 16.10104 | 2.35763 | 15.21593 |
| H | 16.50151 | 1.38909 | 12.90532 |
| H | 16.51606 | 0.24316 | 14.26081 |
| H | 18.02712 | 0.73492 | 13.50636 |
| H | 19.02397 | 1.54486 | 15.63983 |
| H | 17.61190 | 0.89049 | 16.47583 |
| H | 18.12319 | 2.56588 | 16.75935 |
| H | 15.04245 | 4.21755 | 15.23630 |
| H | 16.15411 | 3.26015 | 17.18281 |
| H | 14.96999 | 4.45134 | 17.72554 |
| H | 16.68957 | 4.83985 | 17.74145 |
| H | 15.59055 | 6.96870 | 16.43994 |
| H | 14.05866 | 6.12700 | 16.26211 |
| H | 14.90598 | 6.67781 | 14.82376 |

|   |          |          |          |
|---|----------|----------|----------|
| H | 18.28033 | 0.33102  | 9.93309  |
| H | 17.38565 | -1.16809 | 9.65181  |
| H | 17.41773 | -0.43954 | 11.26469 |
| H | 16.89231 | 2.46022  | 7.01842  |
| H | 16.82068 | 0.70189  | 6.84470  |
| H | 18.02066 | 1.44271  | 7.91087  |
| H | 14.73386 | 3.24227  | 6.98828  |
| H | 13.18971 | 3.25407  | 7.83862  |
| H | 13.59759 | 1.90764  | 6.76521  |
| H | 12.28621 | 1.58815  | 11.11259 |
| H | 11.97615 | 0.50415  | 9.74592  |
| H | 12.02977 | 2.25222  | 9.49833  |
| H | 15.39106 | -0.80406 | 12.14277 |
| H | 13.84197 | -1.15233 | 11.36609 |
| H | 13.99894 | 0.23804  | 12.45066 |
| H | 8.71830  | 2.96401  | 14.64503 |
| H | 10.05404 | 4.19865  | 15.79148 |
| H | 12.89654 | 4.48816  | 14.43759 |
| H | 7.25672  | 8.14010  | 13.64069 |
| H | 10.98562 | 8.68053  | 14.54159 |
| H | 8.63249  | 10.56267 | 15.10691 |
| H | 10.31975 | 11.05398 | 14.87248 |
| H | 9.86585  | 10.08735 | 16.28194 |
| H | 9.98833  | 8.40328  | 12.29257 |
| H | 10.44194 | 10.07889 | 12.61023 |
| H | 8.74191  | 9.60995  | 12.68313 |
| H | 11.14635 | 7.85504  | 16.38952 |
| H | 10.99670 | 8.42984  | 18.70943 |
| H | 9.57967  | 7.41452  | 18.97199 |
| H | 9.43499  | 8.89041  | 18.01144 |
| H | 10.68463 | 5.31732  | 18.00569 |
| H | 12.12718 | 6.33201  | 17.99401 |
| H | 11.63574 | 5.46184  | 16.52413 |
| H | 8.69969  | 5.30568  | 18.04234 |
| H | 7.00857  | 5.85201  | 19.64233 |
| H | 5.91165  | 6.49084  | 18.42109 |

|   |          |         |          |
|---|----------|---------|----------|
| H | 7.39232  | 7.37009 | 18.81776 |
| H | 6.01787  | 4.36541 | 16.92257 |
| H | 6.82598  | 3.72852 | 18.34823 |
| H | 7.58953  | 3.56437 | 16.75312 |
| H | 5.26078  | 6.02811 | 16.28685 |
| H | 4.19688  | 8.21110 | 16.57902 |
| H | 5.39288  | 8.98511 | 15.52555 |
| H | 5.88539  | 8.36330 | 17.10160 |
| H | 3.59214  | 6.87658 | 14.66333 |
| H | 4.64758  | 5.67607 | 13.92729 |
| H | 4.87869  | 7.39987 | 13.58126 |
| H | 5.97154  | 5.85640 | 12.41485 |
| H | 8.58357  | 7.85732 | 10.68627 |
| H | 8.35769  | 6.58767 | 8.54541  |
| H | 7.29947  | 7.99697 | 8.54216  |
| H | 6.62894  | 6.38484 | 8.84610  |
| H | 5.54362  | 7.52138 | 10.79287 |
| H | 6.44706  | 9.00749 | 10.48968 |
| H | 6.48461  | 8.26738 | 12.08516 |
| H | 6.28942  | 1.94455 | 12.37639 |
| H | 4.20354  | 4.16918 | 12.19194 |
| H | 3.89799  | 2.42825 | 12.18227 |
| H | 4.77392  | 3.18856 | 10.83884 |
| H | 6.64314  | 2.59503 | 14.69884 |
| H | 4.92752  | 2.23573 | 14.43746 |
| H | 5.47442  | 3.91096 | 14.56073 |
| H | 9.68534  | 2.35722 | 10.61109 |
| H | 9.28688  | 1.38644 | 12.92088 |
| H | 9.27202  | 0.24150 | 11.56457 |
| H | 7.76121  | 0.73190 | 12.32045 |
| H | 6.76301  | 1.54218 | 10.18746 |
| H | 8.17546  | 0.88980 | 9.35056  |
| H | 7.66252  | 2.56492 | 9.06850  |
| H | 10.74260 | 4.21765 | 10.59244 |
| H | 9.63052  | 3.26194 | 8.64518  |
| H | 10.81451 | 4.45379 | 8.10355  |



|   |          |          |          |
|---|----------|----------|----------|
| H | 9.09487  | 4.84220  | 8.08829  |
| H | 10.19270 | 6.96978  | 9.39188  |
| H | 11.72513 | 6.12889  | 9.56867  |
| H | 10.87759 | 6.67767  | 11.00767 |
| H | 7.50675  | 0.32575  | 15.89391 |
| H | 8.40214  | -1.17321 | 16.17374 |
| H | 8.36924  | -0.44343 | 14.56144 |
| H | 8.89429  | 2.45437  | 18.80870 |
| H | 8.96820  | 0.69617  | 18.98279 |
| H | 7.76680  | 1.43522  | 17.91701 |
| H | 11.05342 | 3.23663  | 18.83932 |
| H | 12.59777 | 3.24820  | 17.98936 |
| H | 12.18896 | 1.90129  | 19.06179 |
| H | 13.49996 | 1.58630  | 14.71330 |
| H | 13.81090 | 0.50102  | 16.07874 |
| H | 13.75680 | 2.24882  | 16.32812 |
| H | 10.39586 | -0.80710 | 13.68275 |
| H | 11.94529 | -1.15512 | 14.45883 |
| H | 11.78749 | 0.23569  | 13.37497 |

250

Complex 2 - septet

|   |          |          |          |
|---|----------|----------|----------|
| C | 9.10520  | 7.83229  | 14.86083 |
| C | 7.79646  | 7.64178  | 14.36213 |
| C | 7.05069  | 6.81435  | 15.24680 |
| C | 7.94997  | 6.40393  | 16.28719 |
| C | 9.22017  | 7.04696  | 16.05840 |
| C | 5.53477  | 6.94074  | 15.40009 |
| C | 5.24155  | 8.31788  | 16.03502 |
| C | 7.57482  | 5.64240  | 17.55467 |
| C | 6.80879  | 6.50263  | 18.58071 |
| C | 10.39556 | 7.23208  | 17.01516 |
| C | 9.99469  | 8.06096  | 18.25169 |
| C | 10.05431 | 8.92519  | 14.39403 |
| C | 9.79721  | 10.21784 | 15.18919 |
| C | 4.67370  | 6.82308  | 14.13885 |
| C | 9.96584  | 9.23181  | 12.89682 |

|    |          |          |          |
|----|----------|----------|----------|
| C  | 11.16376 | 5.99350  | 17.48305 |
| C  | 6.79650  | 4.34216  | 17.31742 |
| U  | 8.99230  | 5.19192  | 13.83254 |
| S  | 11.47862 | 6.15441  | 13.79912 |
| C  | 12.34858 | 4.54908  | 13.68078 |
| S  | 11.03040 | 3.27485  | 13.39529 |
| Ir | 10.01094 | 2.62264  | 15.45001 |
| C  | 9.43165  | 0.55292  | 16.11265 |
| C  | 9.54677  | 1.42969  | 17.26211 |
| C  | 10.93210 | 1.84016  | 17.35365 |
| C  | 11.63923 | 1.27120  | 16.25735 |
| C  | 10.70829 | 0.46016  | 15.48909 |
| C  | 8.53117  | 1.56704  | 18.35126 |
| C  | 11.53761 | 2.59666  | 18.49261 |
| C  | 13.11211 | 1.33585  | 16.01771 |
| C  | 11.09996 | -0.41209 | 14.33967 |
| C  | 8.19821  | -0.20595 | 15.73372 |
| C  | 13.44110 | 4.49933  | 12.58808 |
| S  | 14.48514 | 6.02418  | 12.60542 |
| U  | 16.73997 | 4.53017  | 12.76820 |
| Ir | 15.67237 | 2.36703  | 10.80406 |
| C  | 16.20973 | 0.30930  | 10.11147 |
| C  | 16.20931 | 1.25379  | 9.00687  |
| C  | 14.84156 | 1.71254  | 8.83205  |
| C  | 14.04221 | 1.12203  | 9.85402  |
| C  | 14.89214 | 0.24327  | 10.64636 |
| C  | 17.34120 | 1.46104  | 8.04871  |
| C  | 14.35105 | 2.57240  | 7.71006  |
| C  | 12.56405 | 1.25470  | 10.03303 |
| C  | 14.40670 | -0.63645 | 11.75420 |
| C  | 17.38597 | -0.51202 | 10.53823 |
| S  | 14.48169 | 2.96025  | 12.83343 |
| C  | 6.94518  | 5.34273  | 11.96645 |
| C  | 8.02808  | 5.85900  | 11.20197 |
| C  | 8.91951  | 4.76306  | 10.95934 |
| C  | 8.29478  | 3.56695  | 11.48682 |

|   |          |         |          |
|---|----------|---------|----------|
| C | 7.07034  | 3.93586 | 12.11186 |
| C | 7.96628  | 7.20463 | 10.47542 |
| C | 7.86537  | 6.98770 | 8.95307  |
| C | 10.24500 | 4.74737 | 10.19732 |
| C | 10.15786 | 4.18425 | 8.76319  |
| C | 8.71231  | 2.16841 | 11.05547 |
| C | 8.67942  | 1.03769 | 12.09185 |
| C | 5.94362  | 3.01146 | 12.55662 |
| C | 4.66236  | 3.30622 | 11.75616 |
| C | 6.75485  | 8.06663 | 10.85528 |
| C | 11.01433 | 6.07519 | 10.17812 |
| C | 7.87525  | 1.74037 | 9.83120  |
| C | 5.64902  | 3.00526 | 14.06120 |
| C | 19.09145 | 4.83036 | 14.10212 |
| C | 18.12491 | 5.43394 | 14.95397 |
| C | 17.28689 | 4.37557 | 15.44673 |
| C | 17.79627 | 3.12926 | 14.91877 |
| C | 18.93006 | 3.41985 | 14.10519 |
| C | 18.20248 | 6.88442 | 15.41955 |
| C | 18.68095 | 6.94292 | 16.88251 |
| C | 16.11358 | 4.43839 | 16.42357 |
| C | 16.50106 | 4.03441 | 17.85918 |
| C | 17.33914 | 1.75525 | 15.39190 |
| C | 17.01698 | 0.72091 | 14.30457 |
| C | 19.95874 | 2.45656 | 13.53789 |
| C | 21.31228 | 2.64282 | 14.24390 |
| C | 19.15838 | 7.76275 | 14.60237 |
| C | 15.33272 | 5.75861 | 16.45509 |
| C | 18.35022 | 1.15579 | 16.38837 |
| C | 20.13151 | 2.56408 | 12.01807 |
| C | 17.89353 | 8.00908 | 10.71683 |
| C | 18.58292 | 7.54122 | 9.58163  |
| C | 17.61342 | 7.43959 | 8.47051  |
| C | 16.40231 | 7.90122 | 8.93446  |
| C | 16.58667 | 8.32692 | 10.33900 |
| C | 20.07715 | 7.37594 | 9.50108  |

|   |          |          |          |
|---|----------|----------|----------|
| C | 20.75377 | 8.75168  | 9.33202  |
| C | 15.59979 | 9.13964  | 11.12811 |
| C | 15.40603 | 10.52206 | 10.46846 |
| C | 15.04293 | 7.87673  | 8.26998  |
| C | 14.96061 | 8.69005  | 6.96743  |
| C | 17.89178 | 6.82278  | 7.11828  |
| C | 18.87537 | 7.63233  | 6.25686  |
| C | 15.99219 | 9.32800  | 12.59450 |
| C | 14.53729 | 6.43704  | 8.07378  |
| C | 18.30841 | 5.34663  | 7.22256  |
| C | 20.65561 | 6.64582  | 10.71756 |
| H | 17.09348 | 2.55610  | 11.56773 |
| H | 15.84048 | 3.92906  | 10.39756 |
| H | 12.98707 | 4.41887  | 11.59704 |
| H | 18.32160 | 8.25522  | 11.67807 |
| H | 14.63254 | 8.61595  | 11.10738 |
| H | 16.34349 | 11.08929 | 10.49084 |
| H | 14.64807 | 11.09497 | 11.01377 |
| H | 15.08631 | 10.44622 | 9.42562  |
| H | 16.12840 | 8.37226  | 13.10851 |
| H | 15.20576 | 9.87209  | 13.12682 |
| H | 16.91875 | 9.90708  | 12.68589 |
| H | 14.34309 | 8.34875  | 8.97025  |
| H | 13.92236 | 8.74164  | 6.61915  |
| H | 15.55481 | 8.25129  | 6.15948  |
| H | 15.31831 | 9.71425  | 7.11628  |
| H | 15.19817 | 5.86856  | 7.41182  |
| H | 13.53825 | 6.44058  | 7.61969  |
| H | 14.47311 | 5.90044  | 9.02816  |
| H | 16.94064 | 6.82860  | 6.57658  |
| H | 18.95935 | 7.19306  | 5.25570  |
| H | 19.88108 | 7.65771  | 6.68770  |
| H | 18.53406 | 8.66620  | 6.14490  |
| H | 19.28577 | 5.21934  | 7.69955  |
| H | 18.36978 | 4.89442  | 6.22516  |
| H | 17.57928 | 4.78457  | 7.81499  |

|   |          |          |          |
|---|----------|----------|----------|
| H | 20.31927 | 6.78247  | 8.61313  |
| H | 21.83663 | 8.63326  | 9.21052  |
| H | 20.57519 | 9.37706  | 10.21280 |
| H | 20.36808 | 9.28531  | 8.45859  |
| H | 21.73708 | 6.50888  | 10.60872 |
| H | 20.19927 | 5.65826  | 10.83659 |
| H | 20.48479 | 7.20975  | 11.64004 |
| H | 19.89365 | 5.35982  | 13.60034 |
| H | 17.20842 | 7.34595  | 15.37319 |
| H | 18.01962 | 6.39575  | 17.55500 |
| H | 18.73247 | 7.98050  | 17.23275 |
| H | 19.68128 | 6.50430  | 16.97034 |
| H | 20.17315 | 7.35109  | 14.60231 |
| H | 19.21806 | 8.75231  | 15.06919 |
| H | 18.86111 | 7.93770  | 13.56350 |
| H | 19.62178 | 1.43724  | 13.75066 |
| H | 21.73159 | 3.63229  | 14.03103 |
| H | 22.03653 | 1.89209  | 13.90607 |
| H | 21.20817 | 2.55488  | 15.32982 |
| H | 19.19707 | 2.31032  | 11.50724 |
| H | 20.91403 | 1.88484  | 11.65925 |
| H | 20.42129 | 3.57931  | 11.72371 |
| H | 16.40184 | 1.91138  | 15.93869 |
| H | 16.29800 | 1.10601  | 13.57826 |
| H | 16.59176 | -0.17967 | 14.76588 |
| H | 17.90886 | 0.40894  | 13.75220 |
| H | 19.28460 | 0.88182  | 15.88700 |
| H | 17.94653 | 0.24663  | 16.85120 |
| H | 18.60178 | 1.86221  | 17.18510 |
| H | 15.39818 | 3.68083  | 16.07301 |
| H | 16.90945 | 3.02248  | 17.90781 |
| H | 15.62045 | 4.07042  | 18.51161 |
| H | 17.25114 | 4.70941  | 18.28249 |
| H | 15.89609 | 6.56319  | 16.93663 |
| H | 14.41432 | 5.62434  | 17.03664 |
| H | 15.04019 | 6.08746  | 15.45280 |

|   |          |          |          |
|---|----------|----------|----------|
| H | 18.32342 | 0.03237  | 10.40496 |
| H | 17.44439 | -1.42863 | 9.93677  |
| H | 17.31500 | -0.80300 | 11.58843 |
| H | 17.26302 | 2.42198  | 7.53583  |
| H | 17.35218 | 0.67362  | 7.28256  |
| H | 18.30576 | 1.44057  | 8.56215  |
| H | 15.13691 | 3.23559  | 7.34318  |
| H | 13.50989 | 3.19692  | 8.01780  |
| H | 14.01962 | 1.94844  | 6.86969  |
| H | 12.29799 | 1.40038  | 11.08447 |
| H | 12.05365 | 0.35078  | 9.67489  |
| H | 12.16894 | 2.10253  | 9.46957  |
| H | 15.23794 | -1.07694 | 12.30889 |
| H | 13.79535 | -1.45724 | 11.35747 |
| H | 13.79396 | -0.07298 | 12.46325 |
| H | 8.60263  | 2.96140  | 14.70785 |
| H | 9.94328  | 4.18020  | 15.87505 |
| H | 12.80986 | 4.34778  | 14.65323 |
| H | 7.37710  | 8.18047  | 13.52627 |
| H | 11.08558 | 8.60748  | 14.59430 |
| H | 8.77409  | 10.57694 | 15.02290 |
| H | 10.48950 | 11.00743 | 14.87024 |
| H | 9.93023  | 10.07083 | 16.26463 |
| H | 10.21010 | 8.35367  | 12.29477 |
| H | 10.68000 | 10.02072 | 12.63263 |
| H | 8.96784  | 9.58718  | 12.61219 |
| H | 11.12301 | 7.82864  | 16.45339 |
| H | 10.89170 | 8.43588  | 18.75926 |
| H | 9.44347  | 7.45273  | 18.97632 |
| H | 9.36803  | 8.92008  | 17.99320 |
| H | 10.54214 | 5.31670  | 18.07540 |
| H | 12.00120 | 6.30857  | 18.11807 |
| H | 11.56113 | 5.43605  | 16.63376 |
| H | 8.52139  | 5.35687  | 18.02959 |
| H | 6.78802  | 5.99194  | 19.55308 |
| H | 5.76755  | 6.65884  | 18.27727 |

|   |          |         |          |
|---|----------|---------|----------|
| H | 7.26753  | 7.48459 | 18.72612 |
| H | 5.83616  | 4.51850 | 16.82200 |
| H | 6.57525  | 3.85745 | 18.27683 |
| H | 7.37767  | 3.64951 | 16.70439 |
| H | 5.18665  | 6.17459 | 16.10147 |
| H | 4.18289  | 8.39784 | 16.31441 |
| H | 5.46222  | 9.11857 | 15.31838 |
| H | 5.84790  | 8.49682 | 16.92651 |
| H | 3.63009  | 7.05623 | 14.38266 |
| H | 4.68907  | 5.81933 | 13.71281 |
| H | 4.98896  | 7.53390 | 13.36579 |
| H | 6.08256  | 5.92032 | 12.25800 |
| H | 8.87168  | 7.78959 | 10.66937 |
| H | 8.74399  | 6.49519 | 8.53797  |
| H | 7.75231  | 7.95077 | 8.44041  |
| H | 6.98939  | 6.37377 | 8.71440  |
| H | 5.81879  | 7.57126 | 10.57293 |
| H | 6.79787  | 9.01821 | 10.31385 |
| H | 6.69750  | 8.29968 | 11.91796 |
| H | 6.24558  | 1.99327 | 12.29898 |
| H | 4.25689  | 4.29593 | 11.99239 |
| H | 3.88469  | 2.56724 | 11.98683 |
| H | 4.85351  | 3.27816 | 10.67842 |
| H | 6.51437  | 2.65362 | 14.63032 |
| H | 4.80376  | 2.34230 | 14.28756 |
| H | 5.38951  | 4.00268 | 14.42817 |
| H | 9.75736  | 2.24507 | 10.73495 |
| H | 9.16349  | 1.32402 | 13.02702 |
| H | 9.20053  | 0.16276 | 11.68475 |
| H | 7.65930  | 0.71760 | 12.32693 |
| H | 6.83784  | 1.54093 | 10.12158 |
| H | 8.27685  | 0.81839 | 9.39275  |
| H | 7.85439  | 2.50883 | 9.05409  |
| H | 10.88134 | 4.04751 | 10.75737 |
| H | 9.87397  | 3.12986 | 8.74463  |
| H | 11.13690 | 4.27105 | 8.27543  |

|   |          |          |          |
|---|----------|----------|----------|
| H | 9.43788  | 4.72625  | 8.14370  |
| H | 10.54679 | 6.82638  | 9.53488  |
| H | 12.02328 | 5.90387  | 9.78645  |
| H | 11.12498 | 6.48681  | 11.18382 |
| H | 7.29441  | 0.36635  | 15.95515 |
| H | 8.14382  | -1.14697 | 16.29637 |
| H | 8.18454  | -0.44997 | 14.66949 |
| H | 8.62525  | 2.52103  | 18.87435 |
| H | 8.66013  | 0.76566  | 19.09194 |
| H | 7.51189  | 1.50025  | 17.96600 |
| H | 10.80579 | 3.24467  | 18.97813 |
| H | 12.37249 | 3.22233  | 18.17072 |
| H | 11.91379 | 1.89533  | 19.24911 |
| H | 13.34998 | 1.46950  | 14.95954 |
| H | 13.59244 | 0.40886  | 16.35903 |
| H | 13.56767 | 2.16378  | 16.56558 |
| H | 10.22927 | -0.86285 | 13.85919 |
| H | 11.75026 | -1.22619 | 14.68457 |
| H | 11.64584 | 0.15579  | 13.58098 |



## References

- 1 P. J. Bailey, R. A. Coxall, C. M. Dick, S. Fabre, L. C. Henderson, C. Herber, S. T. Liddle, D. Loroño-González, A. Parkin and S. Parsons, *Chemistry – A European Journal*, 2003, **9**, 4820–4828.
- 2 T. M. Gilbert and R. G. Bergman, *Organometallics*, 1983, **2**, 1458–1460.
- 3 M. A. Boreen, D. J. Lussier, B. A. Skeel, T. D. Lohrey, F. A. Watt, D. K. Shuh, J. R. Long, S. Hohloch and J. Arnold, *Inorg. Chem.*, 2019, **58**, 16629–16641.
- 4 APEX2, APEX3, SADABS, TWINABS and SAINT. Bruker AXS. Madison, WI, USA.
- 5 G. M. Sheldrick, *Acta Crystallogr A Found Adv*, 2015, **71**, 3–8.
- 6 G. M. Sheldrick, *Acta Crystallogr C Struct Chem*, 2015, **71**, 3–8.
- 7 O. V. Dolomanov, L. J. Bourhis, R. J. Gildea, J. A. K. Howard and H. Puschmann, *J Appl Crystallogr*, 2009, **42**, 339–341.
- 8 C. F. Macrae, I. J. Bruno, J. A. Chisholm, P. R. Edgington, P. McCabe, E. Pidcock, L. Rodriguez-Monge, R. Taylor, J. van de Streek and P. A. Wood, *Journal of Applied Crystallography*, 2008, **41**, 466–470.
- 9 M. J. Frisch, G. W. Trucks, H. B. Schlegel, G. E. Scuseria, M. A. Robb, J. R. Cheeseman, G. Scalmani, V. Barone, G. A. Petersson, H. Nakatsuji, X. Li, M. Caricato, A. Marenich, J. Bloino, B. G. Janesko, R. Gomperts, B. Mennucci, H. P. Hratchian, J. V. Ortiz, A. F. Izmaylov, J. L. Sonnenberg, D. Williams-Young, F. Ding, F. Lipparini, F. Egidi, J. Goings, B. Peng, A. Petrone, T. Henderson, D. Ranasinghe, V. G. Zakrzewski, J. Gao, N. Rega, G. Zheng, W. Liang, M. Hada, M. Ehara, K. Toyota, R. Fukuda, J. Hasegawa, M. Ishida, T. Nakajima, Y. Honda, O. Kitao, H. Nakai, T. Vreven, K. Throssell, J. A. Montgomery, Jr., J. E. Peralta, F. Ogliaro, M. Bearpark, J. J. Heyd, E. Brothers, K. N. Kudin, V. N. Staroverov, T. Keith, R. Kobayashi, J. Normand, K. Raghavachari, A. Rendell, J. C. Burant, S. S. Iyengar, J. Tomasi, M. Cossi, J. M. Millam, M. Klene, C. Adamo, R. Cammi, J. W. Ochterski, R. L. Martin, K. Morokuma, O. Farkas, J. B. Foresman and D. J. Fox, Gaussian 09.
- 10 J. P. Perdew, J. A. Chevary, S. H. Vosko, K. A. Jackson, M. R. Pederson, D. J. Singh and C. Fiolhais, *Phys. Rev. B*, 1992, **46**, 6671–6687.
- 11 A. D. Becke, *J. Chem. Phys.*, 1993, **98**, 5648–5652.
- 12 X. Cao and M. Dolg, *Journal of Molecular Structure: THEOCHEM*, 2004, **673**, 203–209.
- 13 X. Cao, M. Dolg and H. Stoll, *J. Chem. Phys.*, 2003, **118**, 487–496.
- 14 D. Andrae, U. Häußermann, M. Dolg, H. Stoll and H. Preuß, *Theoret. Chim. Acta*, 1990, **77**, 123–141.
- 15 A. W. Ehlers, M. Böhme, S. Dapprich, A. Gobbi, A. Höllwarth, V. Jonas, K. F. Köhler, R. Stegmann, A. Veldkamp and G. Frenking, *Chemical Physics Letters*, 1993, **208**, 111–114.
- 16 P. C. Hariharan and J. A. Pople, *Theoret. Chim. Acta*, 1973, **28**, 213–222.
- 17 R. Ditchfield, W. J. Hehre and J. A. Pople, *J. Chem. Phys.*, 1971, **54**, 724–728.
- 18 W. J. Hehre, R. Ditchfield and J. A. Pople, *J. Chem. Phys.*, 1972, **56**, 2257–2261.
- 19 A. E. Reed, L. A. Curtiss and F. Weinhold, *Chem. Rev.*, 1988, **88**, 899–926.
